# Supplementary material for: Aculeatones A and B, epimeric lovastatin derivatives with a 6/6/3-tricyclic carbon skeleton from Aspergillus aculeatus and their chemical transformation
Source: Royal Society of Chemistry journal article supplement (doi:10.1039/d4qo00351a), 2024-01-01
Supplement: d4qo00351a1.pdf [file d4qo00351a1.pdf]

# **Aculeatones A and B, Epimeric Lovastatin Derivatives with a 6/6/3-Tricyclic Carbon Skeleton from *Aspergillus aculeatus* and Their Chemical Transformation**

Fei Liu,<sup>a,b</sup> Fengqing Wang,<sup>a</sup> Qin Li,<sup>a</sup> Bingbing Dai,<sup>a</sup> Weiguang Sun,<sup>a</sup> Jianguo Li,<sup>b</sup>  
Chunmei Chen,<sup>\*a</sup> Yonghui Zhang,<sup>\*a</sup> Hucheng Zhu<sup>\*a</sup>

<sup>a</sup>Hubei Key Laboratory of Natural Medicinal Chemistry and Resource Evaluation, School of Pharmacy, Tongji Medical College, Huazhong University of Science and Technology, Wuhan 430030, Hubei Province, People's Republic of China.

<sup>b</sup>Department of Radiation Medicine and Environment Medicine, China Institute for Radiation Protection, Taiyuan 030006, China.

\* Corresponding authors.

E-mail addresses: [chenchunmei@hust.edu.cn](mailto:chenchunmei@hust.edu.cn) (C. Chen), [zhangyh@mails.tjmu.edu.cn](mailto:zhangyh@mails.tjmu.edu.cn) (Y. Zhang), [zhuhucheng@hust.edu.cn](mailto:zhuhucheng@hust.edu.cn) (H. Zhu).

## List of Supporting Information

|                                                                                                                                                       |    |
|-------------------------------------------------------------------------------------------------------------------------------------------------------|----|
| <b>Table S1.</b> $^1\text{H}$ (400 MHz) and $^{13}\text{C}$ (100 MHz) NMR Data for <b>1–6</b> in $\text{CDCl}_3$ ( $\delta$ in ppm, $J$ in Hz). ..... | 7  |
| <b>Figure S1</b> Key NOESY correlations of compounds <b>3–6</b> . .....                                                                               | 8  |
| <b>Figure S2.</b> the ICD spectra of Mo-complex of compounds <b>1</b> and <b>2</b> . .....                                                            | 8  |
| <b>Figure S3.</b> $^1\text{H}$ NMR spectrum of compound <b>1</b> in $\text{CDCl}_3$ . .....                                                           | 9  |
| <b>Figure S4.</b> $^{13}\text{C}$ NMR and DEPT spectra of compound <b>1</b> in $\text{CDCl}_3$ . .....                                                | 9  |
| <b>Figure S5.</b> HSQC spectrum of compound <b>1</b> in $\text{CDCl}_3$ . .....                                                                       | 10 |
| <b>Figure S6.</b> HMBC spectrum of compound <b>1</b> in $\text{CDCl}_3$ . .....                                                                       | 10 |
| <b>Figure S7.</b> Amplified $^1\text{H}$ - $^{13}\text{C}$ HMBC spectrum of compound <b>1</b> in $\text{CDCl}_3$ . .....                              | 11 |
| <b>Figure S8.</b> $^1\text{H}$ - $^1\text{H}$ COSY spectrum of compound <b>1</b> in $\text{CDCl}_3$ . .....                                           | 12 |
| <b>Figure S9.</b> NOESY spectrum of compound <b>1</b> in $\text{CDCl}_3$ . .....                                                                      | 12 |
| <b>Figure S10.</b> UV spectrum of compound <b>1</b> . .....                                                                                           | 13 |
| <b>Figure S11.</b> IR spectrum of compound <b>1</b> . .....                                                                                           | 13 |
| <b>Figure S12.</b> HRESIMS spectrum of compound <b>1</b> . .....                                                                                      | 13 |
| <b>Figure S13.</b> $^1\text{H}$ NMR spectrum of compound <b>2</b> in $\text{CDCl}_3$ . .....                                                          | 14 |
| <b>Figure S14.</b> $^{13}\text{C}$ NMR and DEPT spectra of compound <b>2</b> in $\text{CDCl}_3$ . .....                                               | 14 |
| <b>Figure S15.</b> HSQC spectrum of compound <b>2</b> in $\text{CDCl}_3$ .....                                                                        | 15 |
| <b>Figure S16.</b> HMBC spectrum of compound <b>2</b> in $\text{CDCl}_3$ . .....                                                                      | 15 |
| <b>Figure S17.</b> Amplified $^1\text{H}$ - $^{13}\text{C}$ HMBC spectrum of compound <b>2</b> in $\text{CDCl}_3$ . .....                             | 16 |
| <b>Figure S18.</b> $^1\text{H}$ - $^1\text{H}$ COSY spectrum of compound <b>2</b> in $\text{CDCl}_3$ . .....                                          | 17 |
| <b>Figure S19.</b> NOESY spectrum of compound <b>2</b> in $\text{CDCl}_3$ . .....                                                                     | 17 |

|                                                                                                                     |    |
|---------------------------------------------------------------------------------------------------------------------|----|
| <b>Figure S20.</b> UV spectrum of compound <b>2</b> .                                                               | 18 |
| <b>Figure S21.</b> IR spectrum of compound <b>2</b> .                                                               | 18 |
| <b>Figure S22.</b> HRESIMS spectrum of compound <b>2</b> .                                                          | 18 |
| <b>Figure S23.</b> $^1\text{H}$ NMR spectrum of compound <b>3</b> in $\text{CDCl}_3$ .                              | 19 |
| <b>Figure S24.</b> $^{13}\text{C}$ and DEPT NMR spectra of compound <b>3</b> in $\text{CDCl}_3$ .                   | 19 |
| <b>Figure S25.</b> HSQC spectrum of compound <b>3</b> in $\text{CDCl}_3$ .                                          | 20 |
| <b>Figure S26.</b> HMBC spectrum of compound <b>3</b> in $\text{CDCl}_3$ .                                          | 20 |
| <b>Figure S27.</b> Amplified $^1\text{H}$ - $^{13}\text{C}$ HMBC spectrum of compound <b>3</b> in $\text{CDCl}_3$ . | 21 |
| <b>Figure S28.</b> $^1\text{H}$ - $^1\text{H}$ COSY spectrum of compound <b>3</b> in $\text{CDCl}_3$ .              | 22 |
| <b>Figure S29.</b> NOESY spectrum of compound <b>3</b> in $\text{CDCl}_3$ .                                         | 22 |
| <b>Figure S30.</b> Amplified NOESY spectrum of compound <b>3</b> in $\text{CDCl}_3$ .                               | 23 |
| <b>Figure S31.</b> UV spectrum of compound <b>3</b> .                                                               | 23 |
| <b>Figure S32.</b> IR spectrum of compound <b>3</b> .                                                               | 24 |
| <b>Figure S33.</b> HRESIMS spectrum of compound <b>3</b> .                                                          | 24 |
| <b>Figure S34.</b> $^1\text{H}$ NMR spectrum of compound <b>4</b> in $\text{CDCl}_3$ .                              | 25 |
| <b>Figure S35.</b> $^{13}\text{C}$ and DEPT NMR spectra of compound <b>4</b> in $\text{CDCl}_3$ .                   | 25 |
| <b>Figure S36.</b> HSQC spectrum of compound <b>4</b> in $\text{CDCl}_3$ .                                          | 26 |
| <b>Figure S37.</b> HMBC spectrum of compound <b>4</b> in $\text{CDCl}_3$ .                                          | 26 |
| <b>Figure S38.</b> Amplified $^1\text{H}$ - $^{13}\text{C}$ HMBC spectrum of compound <b>4</b> in $\text{CDCl}_3$ . | 27 |
| <b>Figure S39.</b> $^1\text{H}$ - $^1\text{H}$ COSY spectrum of compound <b>4</b> in $\text{CDCl}_3$ .              | 28 |
| <b>Figure S40.</b> NOESY spectrum of compound <b>4</b> in $\text{CDCl}_3$ .                                         | 28 |
| <b>Figure S41.</b> Amplified NOESY spectrum of compound <b>4</b> in $\text{CDCl}_3$ .                               | 29 |

|                                                                                                              |    |
|--------------------------------------------------------------------------------------------------------------|----|
| <b>Figure S42.</b> UV spectrum of compound <b>4</b> . .....                                                  | 29 |
| <b>Figure S43.</b> IR spectrum of compound <b>4</b> . .....                                                  | 30 |
| <b>Figure S44.</b> HRESIMS spectrum of compound <b>4</b> . .....                                             | 30 |
| <b>Figure S45.</b> $^1\text{H}$ NMR spectrum of compound <b>5</b> in $\text{CDCl}_3$ . .....                 | 31 |
| <b>Figure S46.</b> $^{13}\text{C}$ and DEPT NMR spectra of compound <b>5</b> in $\text{CDCl}_3$ . .....      | 31 |
| <b>Figure S47.</b> HSQC spectrum of compound <b>5</b> in $\text{CDCl}_3$ . .....                             | 32 |
| <b>Figure S48.</b> HMBC spectrum of compound <b>5</b> in $\text{CDCl}_3$ . .....                             | 32 |
| <b>Figure S49.</b> $^1\text{H}$ - $^1\text{H}$ COSY spectrum of compound <b>5</b> in $\text{CDCl}_3$ . ..... | 33 |
| <b>Figure S50.</b> NOESY spectrum of compound <b>5</b> in $\text{CDCl}_3$ . .....                            | 33 |
| <b>Figure S51.</b> Amplified NOESY spectrum of compound <b>5</b> in $\text{CDCl}_3$ . .....                  | 34 |
| <b>Figure S52.</b> UV spectrum of compound <b>5</b> . .....                                                  | 34 |
| <b>Figure S53.</b> IR spectrum of compound <b>5</b> . .....                                                  | 34 |
| <b>Figure S54.</b> HRESIMS spectrum of compound <b>5</b> . .....                                             | 35 |
| <b>Figure S55.</b> $^1\text{H}$ NMR spectrum of compound <b>6</b> in $\text{CDCl}_3$ . .....                 | 35 |
| <b>Figure S56.</b> $^{13}\text{C}$ and DEPT NMR spectrum of compound <b>6</b> in $\text{CDCl}_3$ . .....     | 36 |
| <b>Figure S57.</b> HSQC spectrum of compound <b>6</b> in $\text{CDCl}_3$ . .....                             | 36 |
| <b>Figure S58.</b> HMBC spectrum of compound <b>6</b> in $\text{CDCl}_3$ . .....                             | 37 |
| <b>Figure S59.</b> $^1\text{H}$ - $^1\text{H}$ COSY spectrum of compound <b>6</b> in $\text{CDCl}_3$ . ..... | 37 |
| <b>Figure S60.</b> NOESY spectrum of compound <b>6</b> in $\text{CDCl}_3$ . .....                            | 38 |
| <b>Figure S61.</b> Amplified NOESY spectrum of compound <b>6</b> in $\text{CDCl}_3$ . .....                  | 38 |
| <b>Figure S62.</b> UV spectrum of compound <b>6</b> . .....                                                  | 39 |
| <b>Figure S63.</b> IR spectrum of compound <b>6</b> . .....                                                  | 39 |

|                                                                                                                                                                                                                         |    |
|-------------------------------------------------------------------------------------------------------------------------------------------------------------------------------------------------------------------------|----|
| <b>Figure S64.</b> HRESIMS spectrum of compound <b>6</b> .....                                                                                                                                                          | 39 |
| <b>Figure S65.</b> HRESIMS spectrum of the reaction product of <b>3</b> treated with <i>o</i> -phosphoric acid in EtOH. ....                                                                                            | 40 |
| <b>Figure S66.</b> <sup>1</sup> H NMR spectrum of <i>syn</i> - <b>1</b> in CDCl <sub>3</sub> . ....                                                                                                                     | 40 |
| <b>Figure S67.</b> <sup>13</sup> C and DEPT NMR spectrum of <i>syn</i> - <b>1</b> in CDCl <sub>3</sub> . ....                                                                                                           | 41 |
| <b>Figure S68.</b> (A) The UPLC-MS spectra of compound <b>1</b> and an extract of <i>A. aculeatus</i> . (B) HRMS spectra of <i>m/z</i> 501.1460 in extract (top) and <b>1</b> (bottom). ....                            | 41 |
| <b>Preparation of (S)- and (R)-MTPA esters of 5</b> .....                                                                                                                                                               | 42 |
| <b>Figure S69.</b> $\Delta\delta_{RS}$ values ( $\delta_R - \delta_S$ , in ppm) for <b>5R</b> and <b>5S</b> . ....                                                                                                      | 42 |
| <b>NMR calculation details</b> .....                                                                                                                                                                                    | 42 |
| <b>Figure S70.</b> Structures ( <b>A</b> and <b>B</b> ) used for NMR DP4+ calculation.....                                                                                                                              | 44 |
| <b>Table S2.</b> Gibbs free energies <sup>a</sup> and equilibrium populations <sup>b</sup> of low-energy conformers of <b>A</b> and <b>B</b> . ....                                                                     | 44 |
| <b>Table S3.</b> Cartesian coordinates for the low-energy reoptimized random search conformers of <b>A</b> and <b>B</b> at B3LYP-D3(BJ)/6-31G* level of theory in chloroform. ....                                      | 45 |
| <b>Table S4.</b> MAE <sub><math>\Delta\delta</math></sub> analysis based on the calculated NMR chemical shifts of <b>A</b> and <b>B</b> as well as the experimental NMR chemical shifts of <b>1</b> and <b>2</b> . .... | 47 |
| <b>Figure S71.</b> Structures ( <b>C</b> and <b>D</b> ) used for NMR DP4+ calculation.....                                                                                                                              | 48 |
| <b>Table S5.</b> Gibbs free energies <sup>a</sup> and equilibrium populations <sup>b</sup> of low-energy conformers of <b>C</b> and <b>D</b> . ....                                                                     | 48 |
| <b>Table S6.</b> Cartesian coordinates for the low-energy reoptimized random search conformers of <b>C</b> and <b>D</b> at B3LYP-D3(BJ)/6-31G* level of theory in chloroform. ....                                      | 49 |

|                                                                                                                                                                                                             |    |
|-------------------------------------------------------------------------------------------------------------------------------------------------------------------------------------------------------------|----|
| <b>Table S7.</b> MAE $_{\Delta\Delta\delta}$ analysis based on the calculated NMR chemical shifts of <b>C</b> and <b>D</b> as well as the experimental NMR chemical shifts of <b>5</b> and <b>6</b> . ..... | 52 |
| <b>Theory and ECD calculation details.</b> .....                                                                                                                                                            | 52 |

**Table S1.** <sup>1</sup>H (400 MHz) and <sup>13</sup>C (100 MHz) NMR Data for **1–6** in CDCl<sub>3</sub> ( $\delta$  in ppm, *J* in Hz).

| NO. | 1                    |                     | 2                    |                     | 3                   |                     | 4                   |                     | 5                   |                     | 6                   |                     |
|-----|----------------------|---------------------|----------------------|---------------------|---------------------|---------------------|---------------------|---------------------|---------------------|---------------------|---------------------|---------------------|
|     | $\delta_{\text{H}}$  | $\delta_{\text{C}}$ | $\delta_{\text{H}}$  | $\delta_{\text{C}}$ | $\delta_{\text{H}}$ | $\delta_{\text{C}}$ | $\delta_{\text{H}}$ | $\delta_{\text{C}}$ | $\delta_{\text{H}}$ | $\delta_{\text{C}}$ | $\delta_{\text{H}}$ | $\delta_{\text{C}}$ |
| 1   | 4.79 td (10.7, 4.4)  | 76.5                | 4.79 td (10.7, 4.4)  | 76.5                | 4.78 td (10.5, 5.0) | 74.4                | 4.78 td (10.5, 5.0) | 74.3                | 4.76 td (10.3, 4.5) | 75.1                | 4.76 td (10.3, 4.5) | 75.1                |
| 2   | 1.06 m               | 40.4                | 1.04 m               | 40.5                | 0.96 m              | 40.5                | 0.96 m              | 40.5                | 1.06 m              | 40.8                | 1.06 m              | 40.7                |
| 3   | 2.10 m               |                     | 2.10 m               |                     | 2.22 m              |                     | 2.22 m              |                     | 2.13 m              |                     | 2.13 m              |                     |
| 4   | 1.63 m               | 30.7                | 1.62 m               | 30.7                | 1.55 m              | 29.4                | 1.55 m              | 29.4                | 1.61 m              | 30.2                | 1.61 m              | 30.2                |
| 5   | 0.76 dd (12.4, 11.5) | 40.7                | 0.76 dd (12.4, 11.5) | 40.7                | 0.84 m              | 42.0                | 0.84 m              | 42.0                | 0.87 m              | 41.3                | 0.87 m              | 41.3                |
| 6   | 1.55 m               |                     | 1.55 m               |                     | 1.61 m              |                     | 1.61 m              |                     | 1.65 m              |                     | 1.65 m              |                     |
| 7   | 1.57 m               | 41.3                | 1.57 m               | 41.4                | 1.58 m              | 40.8                | 1.58 m              | 40.8                | 1.68 m              | 38.2                | 1.68 m              | 38.2                |
| 8   | 1.98 dd (15.5, 13.1) | 43.5                | 1.98 dd (13.0, 2.4)  | 43.4                | 2.19 m              | 48.4                | 2.19 m              | 48.4                | 2.23 m              | 44.4                | 2.23 m              | 44.4                |
| 9   | 2.18 m               |                     | 2.16 dd (13.0, 2.4)  |                     | 2.46 dd (10.5, 3.7) |                     | 2.46 dd (10.5, 3.7) |                     | 2.32 m              |                     | 2.32 m              |                     |
| 10  |                      | 209.1               |                      | 209.1               |                     | 209.1               |                     | 209.1               |                     | 212.1               |                     | 212.1               |
| 11  |                      | 33.2                |                      | 33.2                | 2.39 m              | 47.4                | 2.39 m              | 47.4                | 2.67 dd (7.3, 5.6)  | 45.9                | 2.67 dd (7.3, 5.6)  | 45.9                |
| 12  | 1.34 dd (5.9, 2.3)   | 32.3                | 1.35 dd (6.0, 2.2)   | 32.3                | 1.09 m              | 52.0                | 1.09 m              | 52.0                | 1.57 dd (7.3, 5.6)  | 45.5                | 1.57 dd (7.3, 5.6)  | 45.5                |
| 13  | 1.51 m               | 47.7                | 1.52 m               | 47.7                | 1.77 m              | 49.3                | 1.77 m              | 49.3                | 1.70 m              | 43.5                | 1.70 m              | 43.4                |
| 14  | 0.93 d (6.5)         | 21.8                | 0.93 d (6.5)         | 21.8                | 0.91 d (6.3)        | 21.7                | 0.91 d (6.3)        | 21.7                | 0.94 d (6.3)        | 21.8                | 0.94 d (6.4)        | 21.8                |
| 15  | 1.15 s               | 15.7                | 1.17 s               | 15.7                | 1.05 d (6.7)        | 13.1                | 1.05 d (6.7)        | 13.0                | 1.12 d (7.1)        | 12.4                | 1.13 d (7.1)        | 12.5                |
| 16  | 1.21 dd (8.4, 5.9)   | 37.7                | 1.22 dd (8.3, 6.0)   | 37.7                | 3.00 m              | 57.9                | 3.00 dd (7.0, 2.3)  | 57.9                | 2.91 dd (7.5, 2.3)  | 57.6                | 2.91 dd (7.5, 2.3)  | 57.7                |
| 17  | 3.22 t (7.1)         | 73.7                | 3.24 dd (8.3, 6.0)   | 73.5                | 2.77 dd (3.8, 2.3)  | 61.8                | 2.77 dd (3.8, 2.3)  | 61.8                | 2.79 dd (4.8, 2.3)  | 60.3                | 2.79 dd (4.8, 2.3)  | 60.3                |
| 18  | 4.05 t (5.9)         | 75.8                | 4.04 t (6.0)         | 75.9                | 4.14 br s           | 70.3                | 4.15 br s           | 70.4                | 4.02 br s           | 71.3                | 4.02 br s           | 71.4                |
| 19  | 5.85 dd (15.5, 5.9)  | 128.4               | 5.87 dd (15.5, 6.0)  | 128.7               | 5.97 overlapped     | 128.6               | 5.98 overlapped     | 128.6               | 5.97 m              | 128.2               | 5.97 m              | 128.1               |
| 20  | 5.94 d (15.5)        | 134.8               | 5.98 d (15.5)        | 135.0               | 5.97 overlapped     | 134.3               | 5.98 overlapped     | 134.3               | 5.95 m              | 134.3               | 5.95 m              | 134.4               |
| 21  |                      | 74.6                |                      | 74.3                |                     | 74.4                |                     | 74.4                |                     | 74.3                |                     | 74.3                |
| 22  |                      | 175.6               |                      | 175.6               |                     | 175.8               |                     | 175.8               |                     | 175.9               |                     | 175.8               |
| 23  | 1.49 s               | 26.2                | 1.51 s               | 26.4                | 1.48 s              | 26.4                | 1.48 s              | 26.4                | 1.49 s              | 26.5                | 1.49 s              | 26.5                |
| 24  | 3.79 s               | 53.1                | 3.79 s               | 53.3                | 3.78 s              | 53.4                | 3.78 s              | 53.4                | 3.79 s              | 53.4                | 3.79 s              | 53.4                |
| 25  | 1'                   | 171.4               | 1'                   | 171.4               | 1'                  | 170.8               | 1'                  | 170.8               | 1'                  | 171.2               | 1'                  | 171.2               |
| 26  | 3.10 br s            | 44.0                | 3.10 br s            | 44                  | 3.01 br s           | 44.0                | 3.01 br s           | 44.0                | 3.03 br s           | 43.9                | 3.03 br s           | 43.9                |
| 27  | 3'                   | 139.2               | 3'                   | 139.2               | 3'                  | 139.4               | 3'                  | 139.4               | 3'                  | 139.0               | 3'                  | 139.0               |
| 28  | 4.88 br s            | 114.7               | 4.88 br s            | 114.8               | 4.84 br s           | 114.5               | 4.84 br s           | 114.5               | 4.83 br s           | 114.7               | 4.83 br s           | 114.7               |
| 29  | 4.93 br s            |                     | 4.93 br s            |                     | 4.90 br s           |                     | 4.90 br s           |                     | 4.90 br s           |                     | 4.90 br s           |                     |
| 30  | 1.84 br s            | 22.7                | 1.84 br s            | 22.7                | 1.83 br s           | 22.7                | 1.83 br s           | 22.7                | 1.82 br s           | 22.7                | 1.82 br s           | 22.7                |

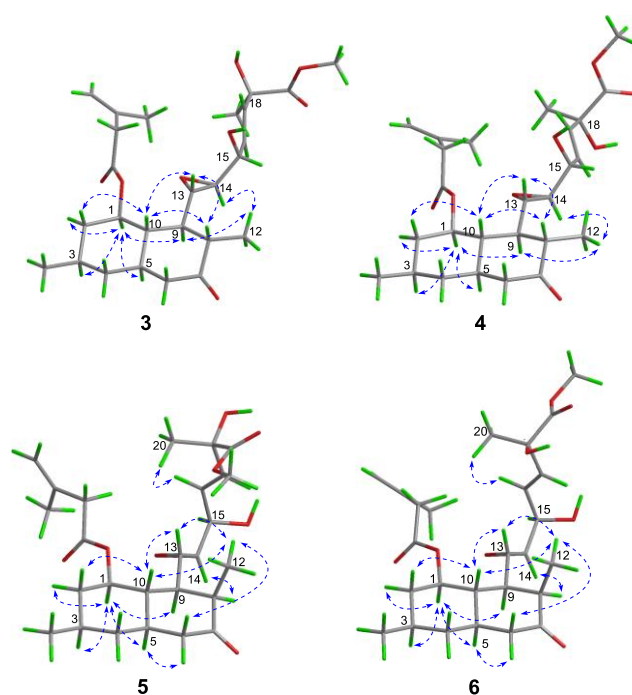

**Figure. S1** Key NOESY correlations of compounds **3–6**.

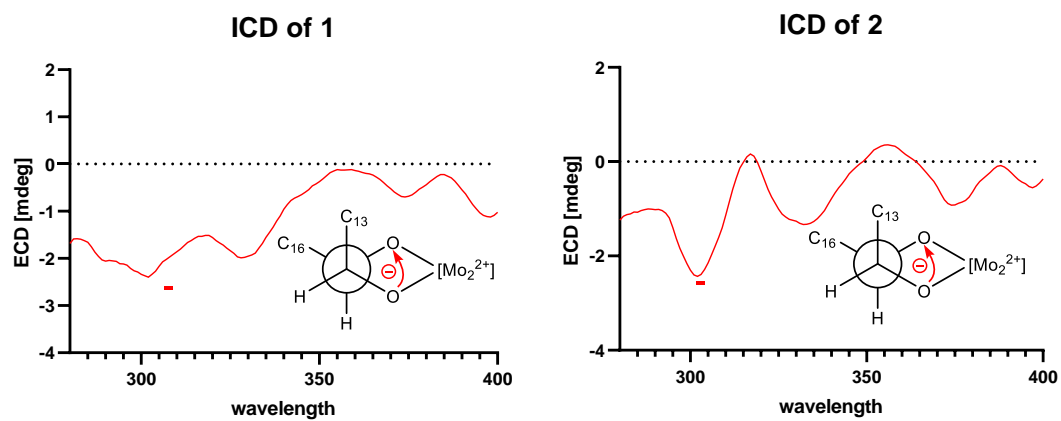

**Figure S2.** the ICD spectra of Mo-complex of compounds **1** and **2**.



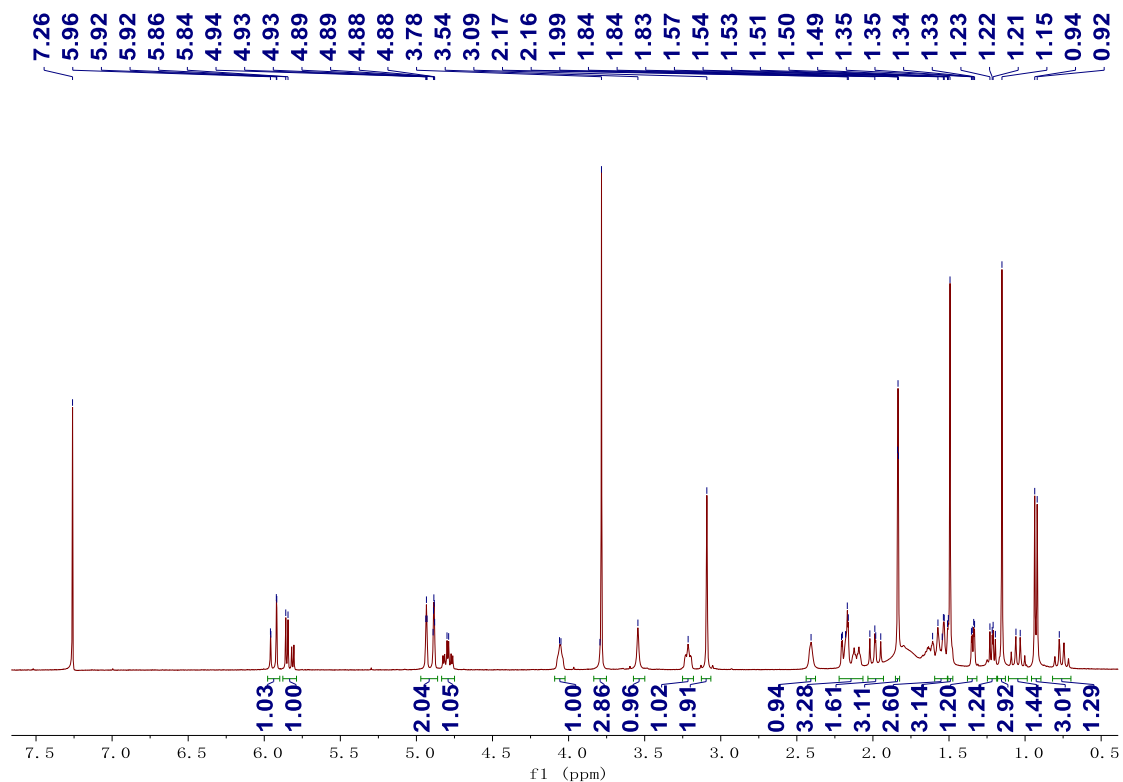

Figure S3.  $^1\text{H}$  NMR spectrum of compound **1** in  $\text{CDCl}_3$ .

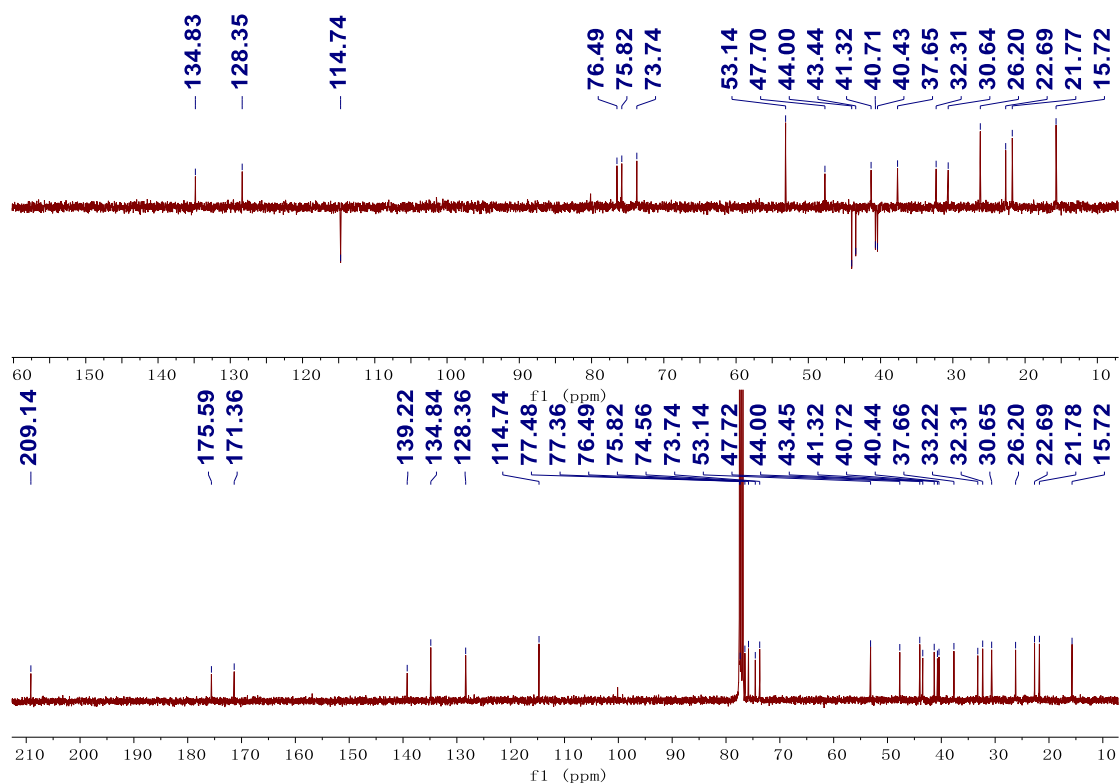

Figure S4.  $^{13}\text{C}$  NMR and DEPT spectra of compound **1** in  $\text{CDCl}_3$ .

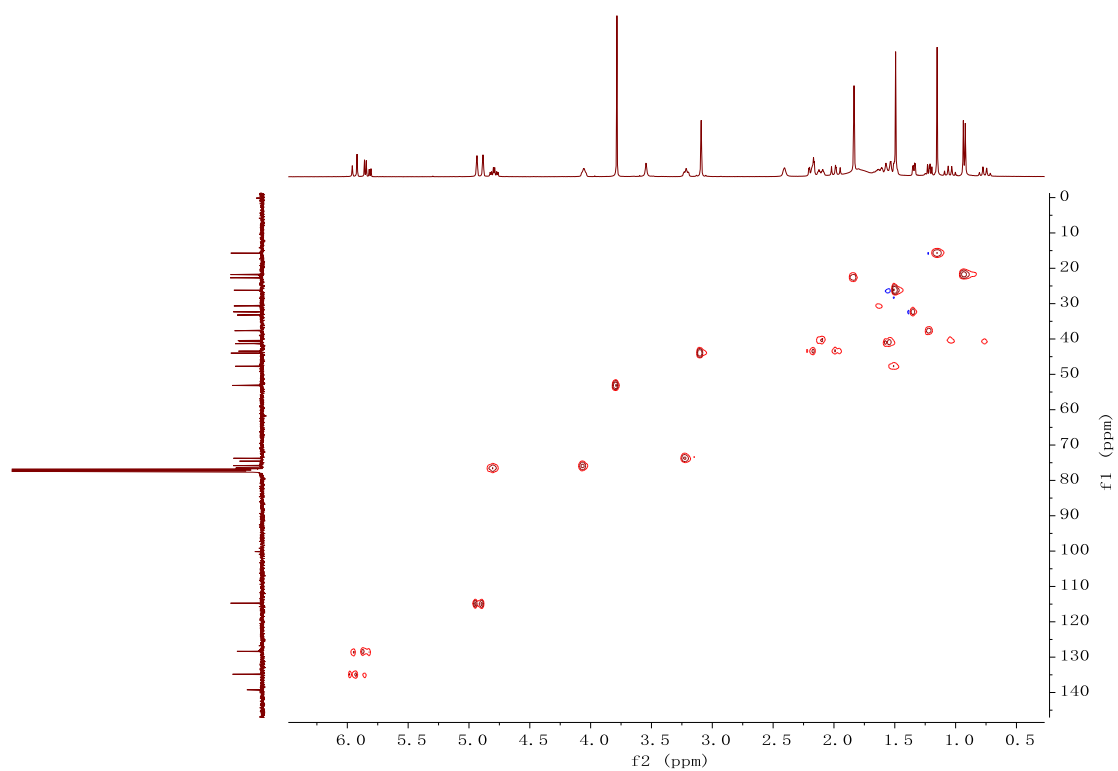

**Figure S5.** HSQC spectrum of compound **1** in  $\text{CDCl}_3$ .

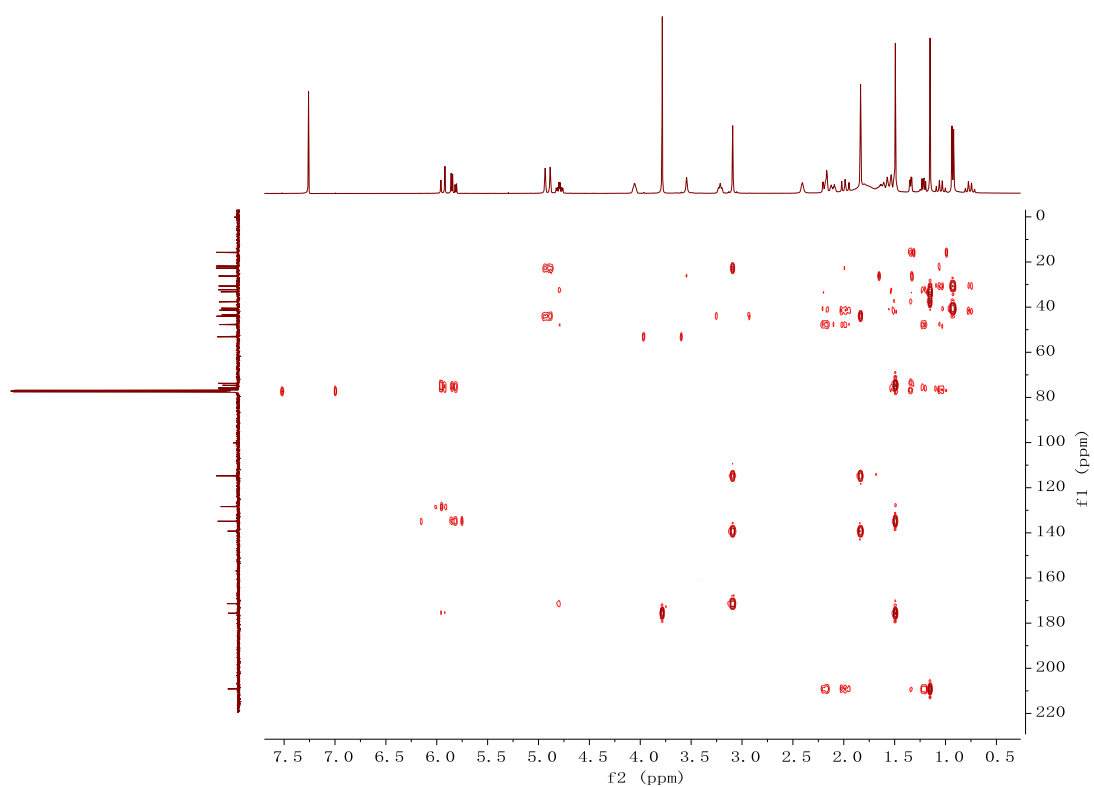

**Figure S6.** HMBC spectrum of compound **1** in  $\text{CDCl}_3$ .

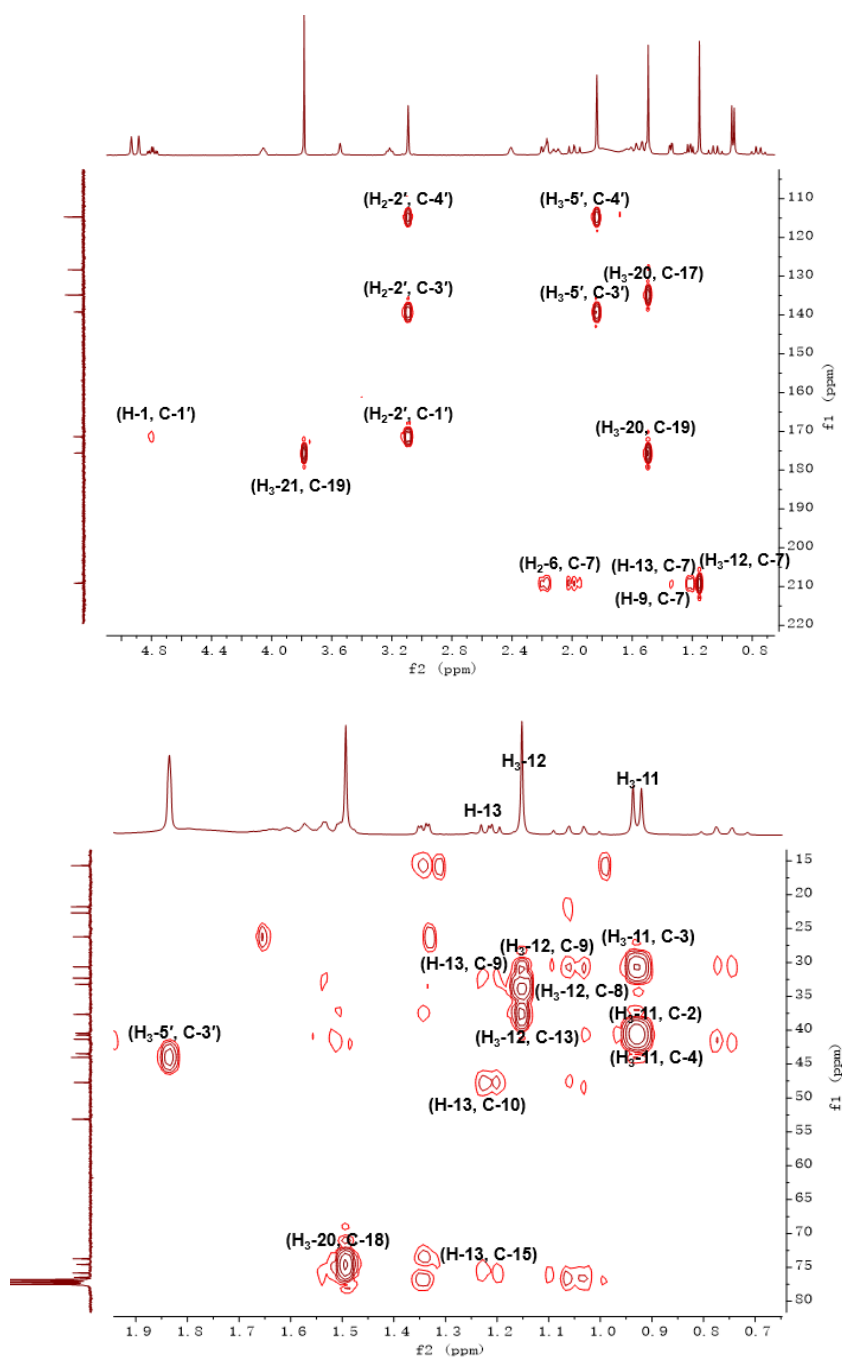

**Figure S7.** Amplified  $^1\text{H}$ - $^{13}\text{C}$  HMBC spectrum of compound **1** in  $\text{CDCl}_3$ .

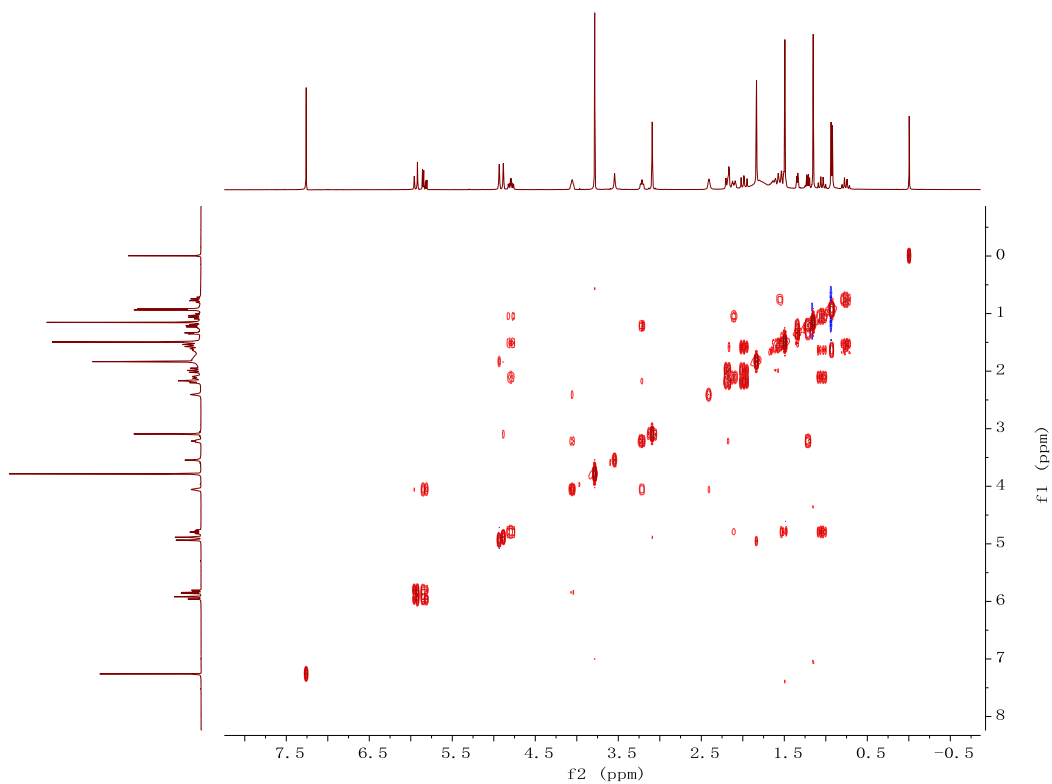

**Figure S8.**  $^1\text{H}$ - $^1\text{H}$  COSY spectrum of compound **1** in  $\text{CDCl}_3$ .

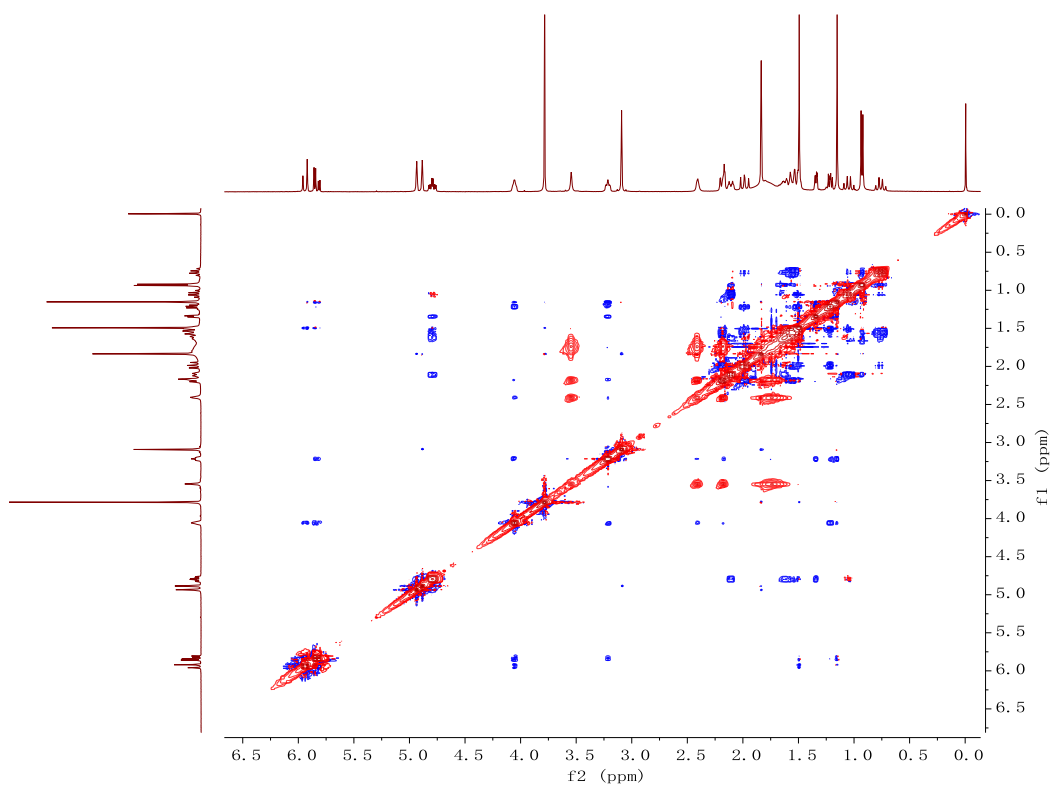

**Figure S9.** NOESY spectrum of compound **1** in  $\text{CDCl}_3$ .

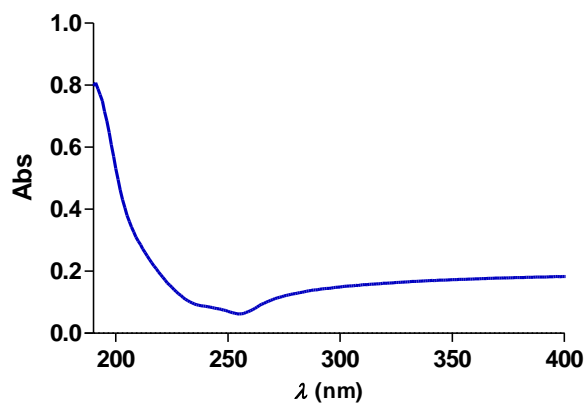

**Figure S10.** UV spectrum of compound 1.

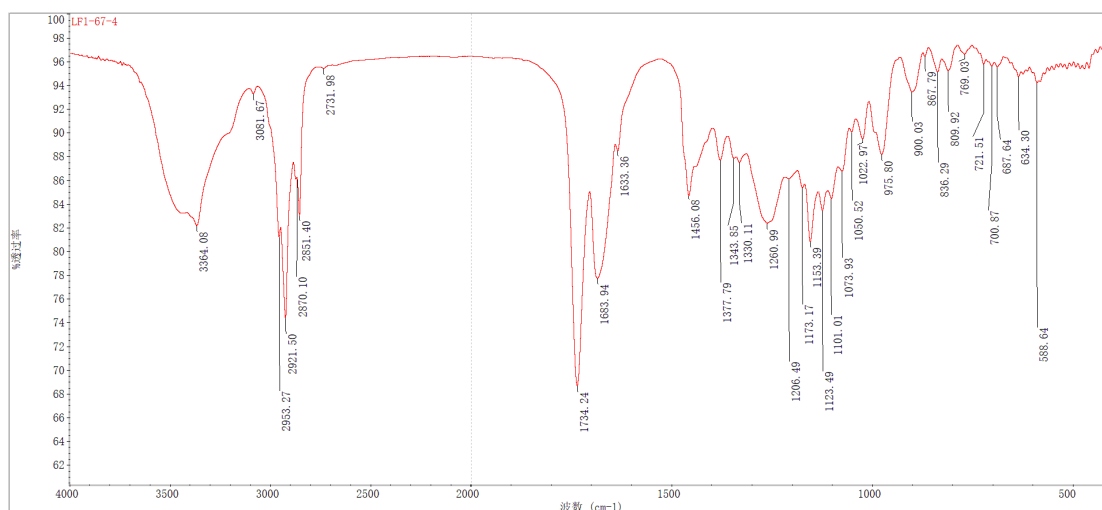

**Figure S11.** IR spectrum of compound 1.

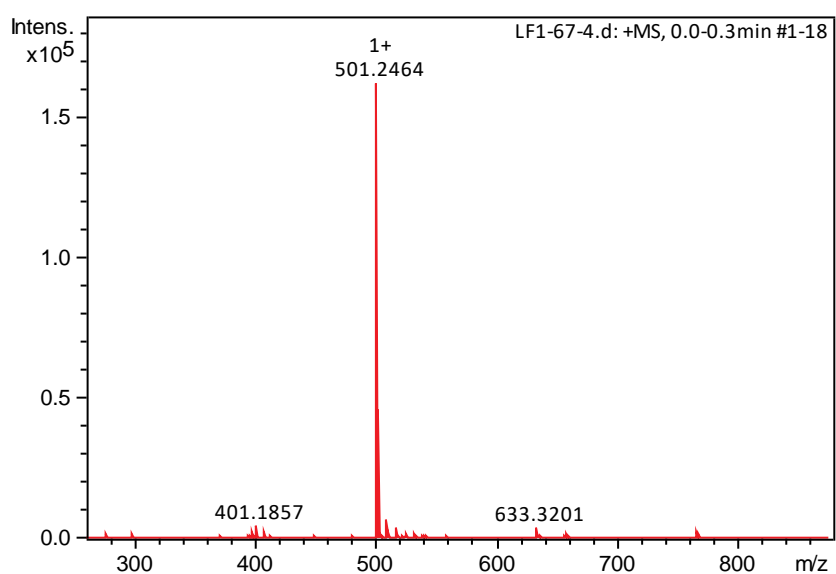

**Figure S12.** HRESIMS spectrum of compound 1.

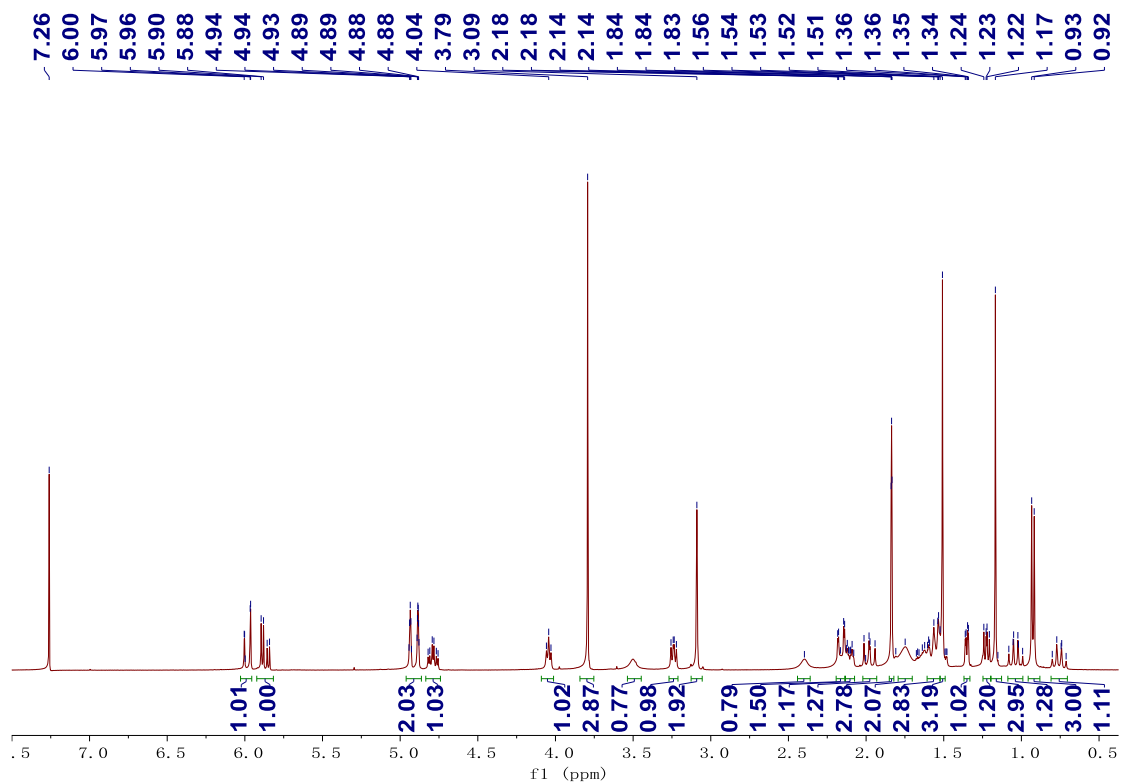

**Figure S13.**  $^1\text{H}$  NMR spectrum of compound **2** in  $\text{CDCl}_3$ .

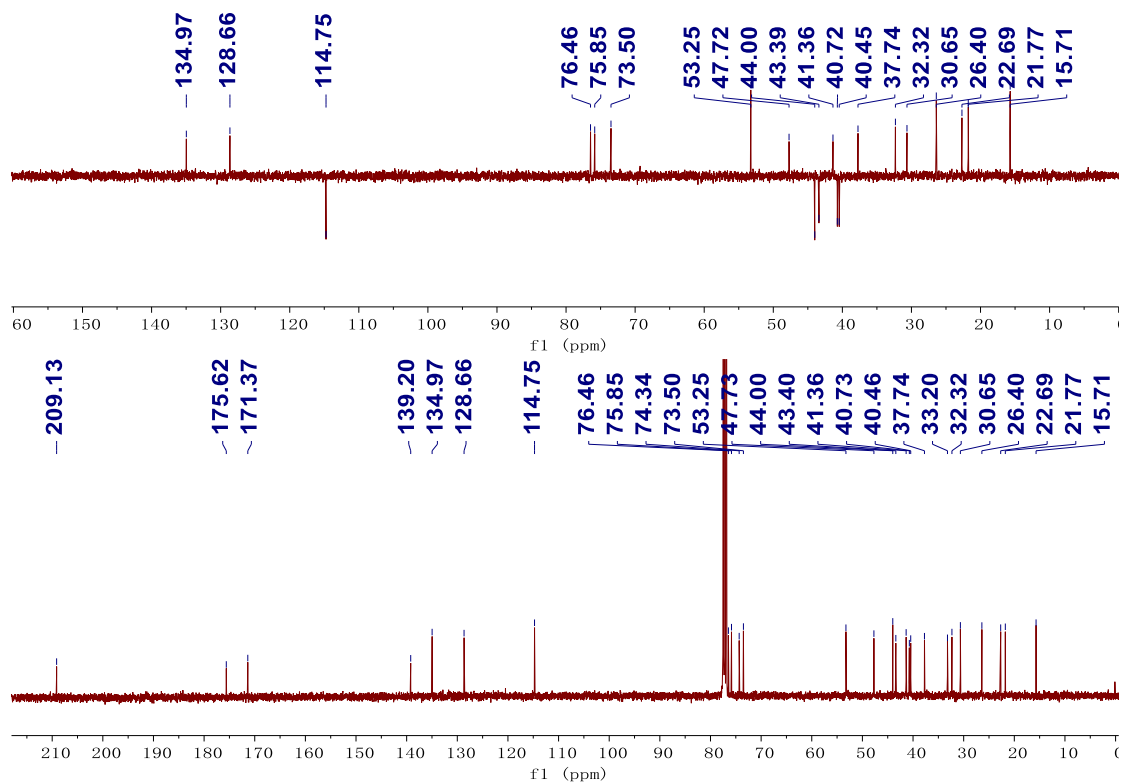

**Figure S14.**  $^{13}\text{C}$  NMR and DEPT spectra of compound **2** in  $\text{CDCl}_3$ .

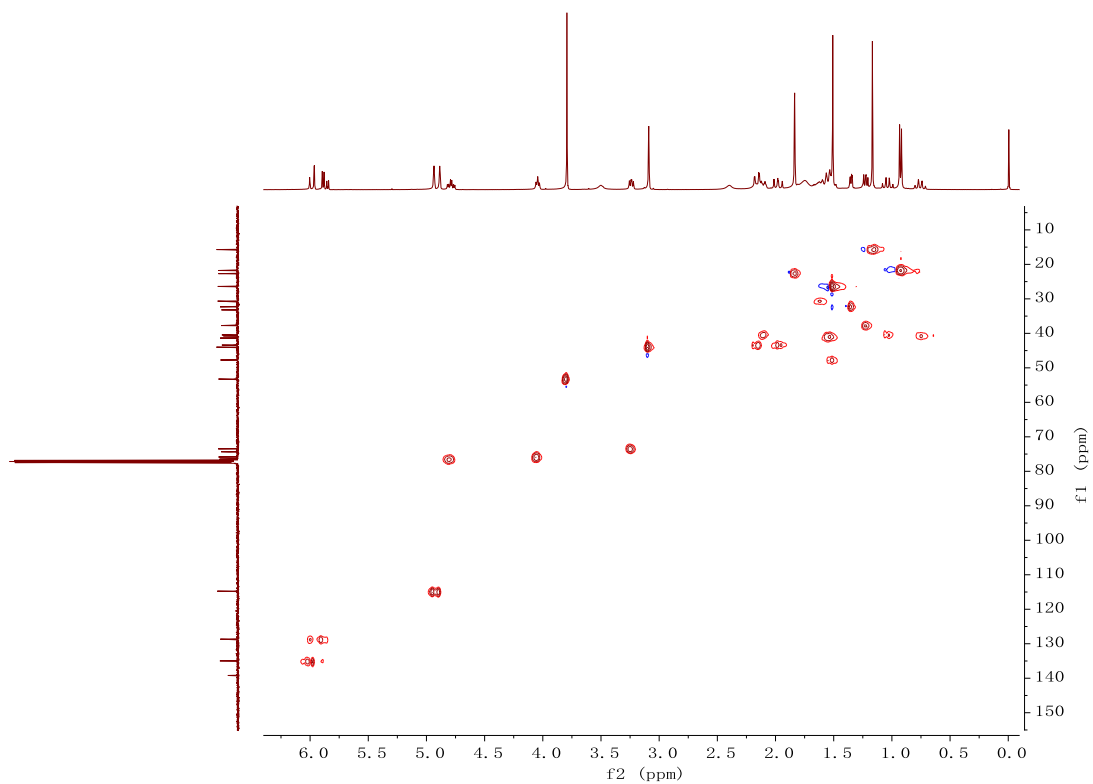

**Figure S15.** HSQC spectrum of compound **2** in CDCl<sub>3</sub>

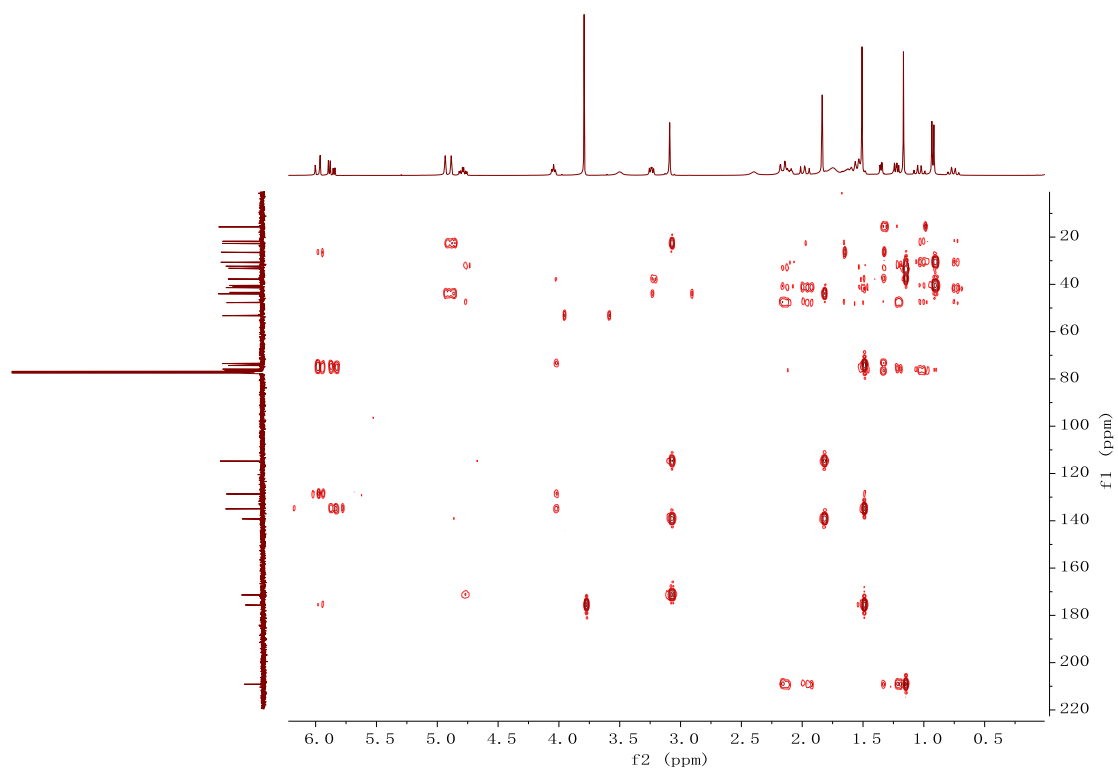

**Figure S16.** HMBC spectrum of compound **2** in CDCl<sub>3</sub>.

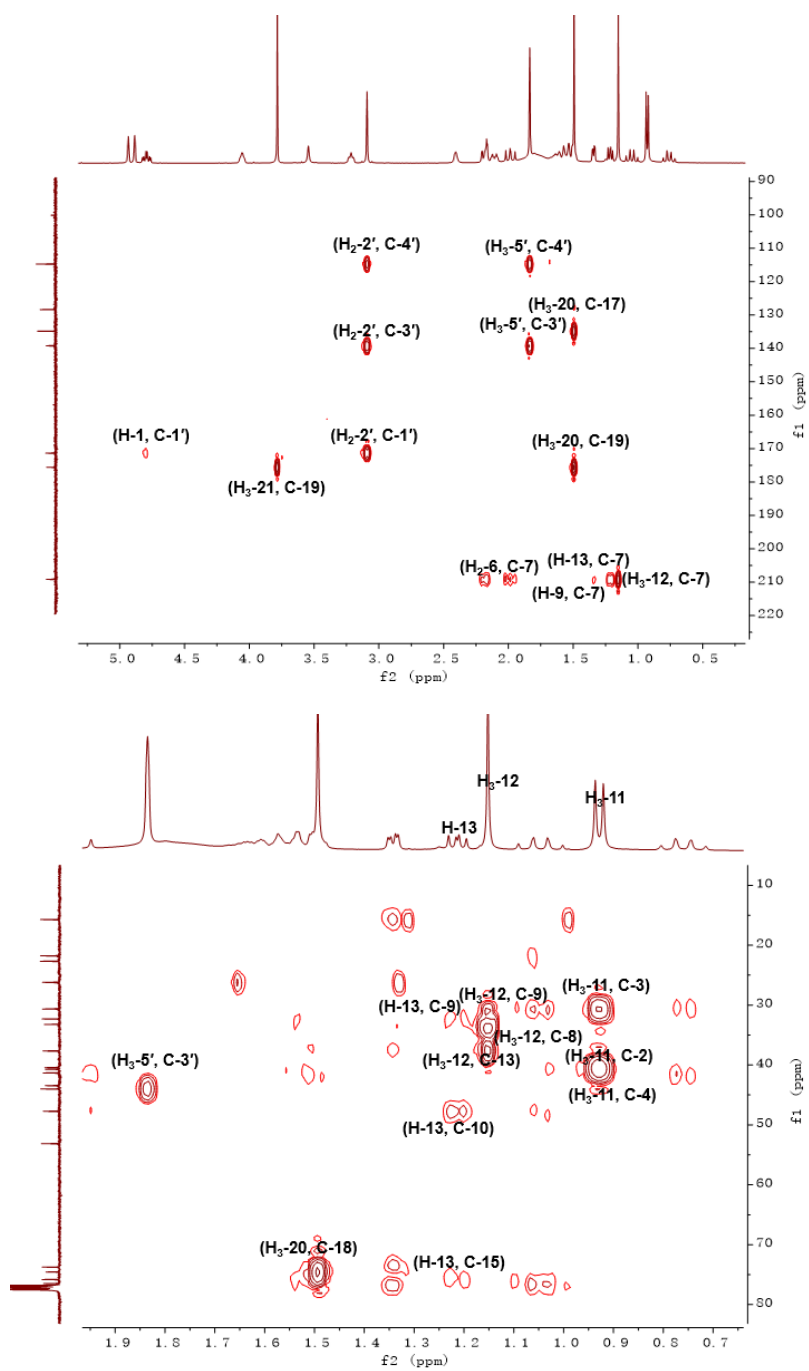

**Figure S17.** Amplified  $^1\text{H}$ - $^{13}\text{C}$  HMBC spectrum of compound **2** in  $\text{CDCl}_3$ .



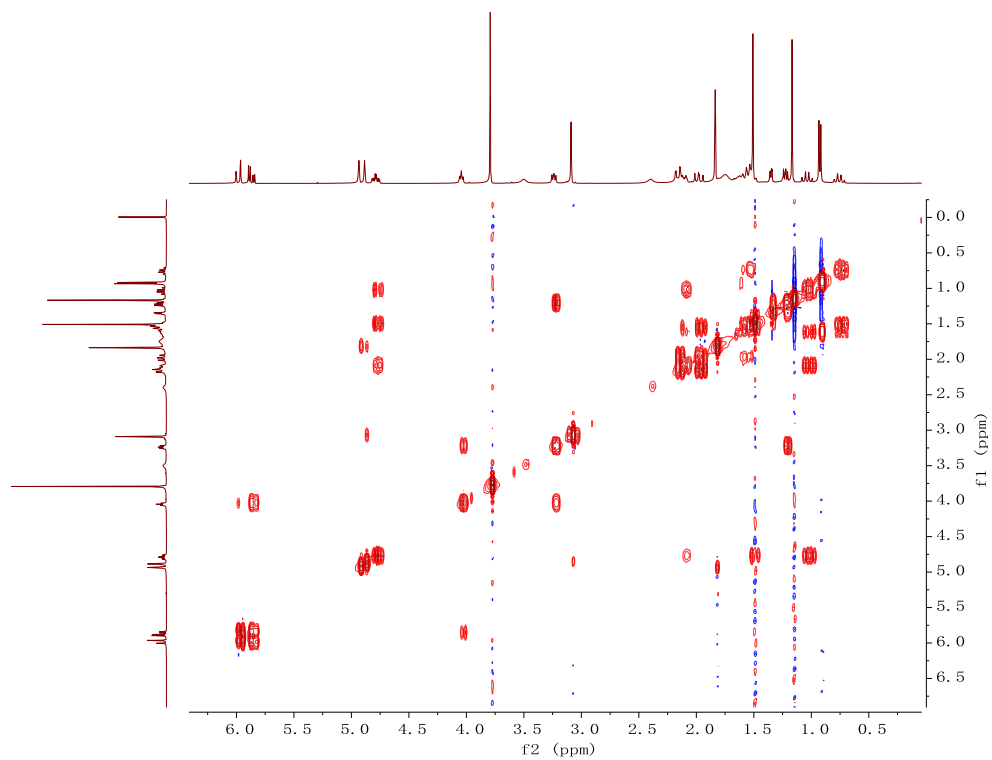

**Figure S18.**  $^1\text{H}$ - $^1\text{H}$  COSY spectrum of compound **2** in  $\text{CDCl}_3$ .

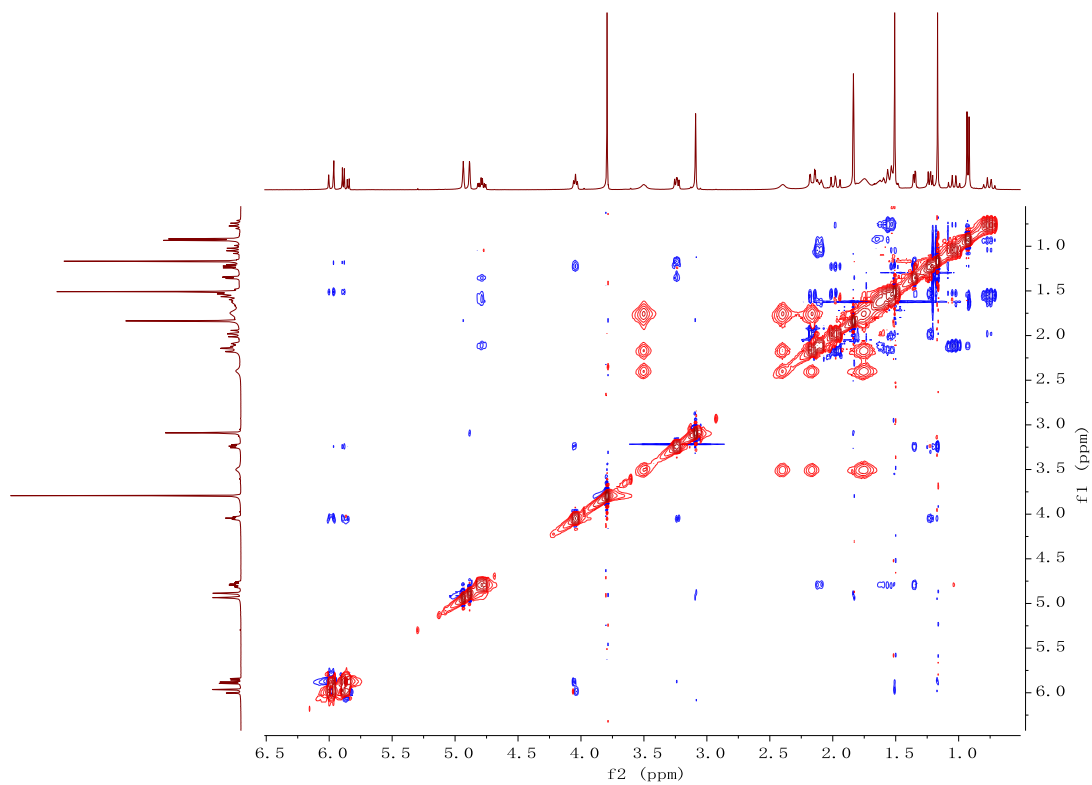

**Figure S19.** NOESY spectrum of compound **2** in  $\text{CDCl}_3$ .

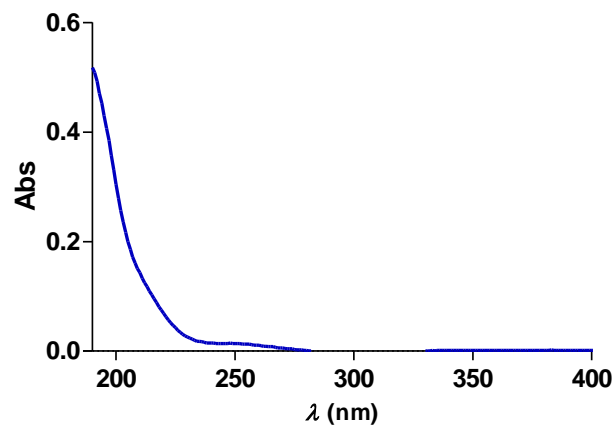

**Figure S20.** UV spectrum of compound 2.

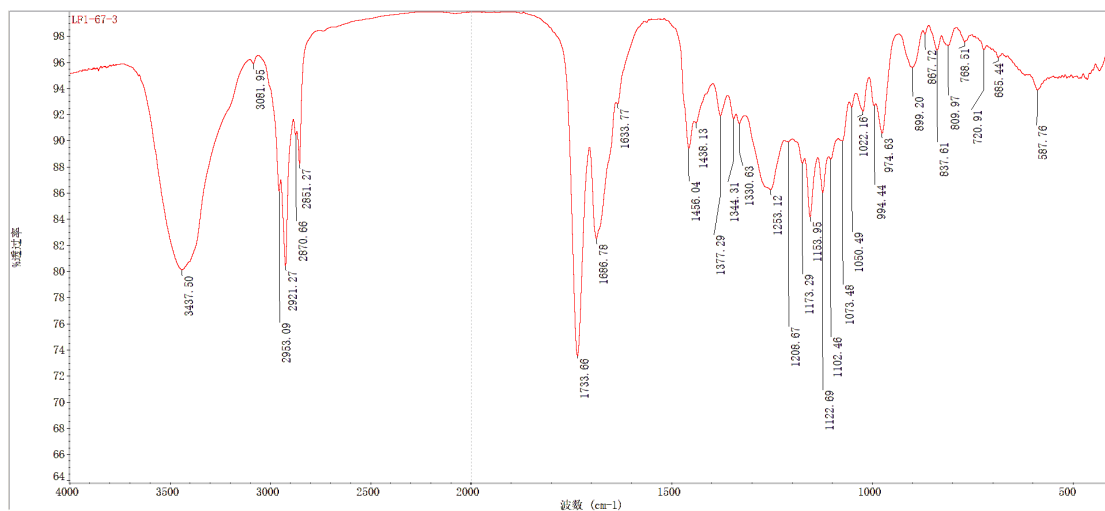

**Figure S21.** IR spectrum of compound 2.

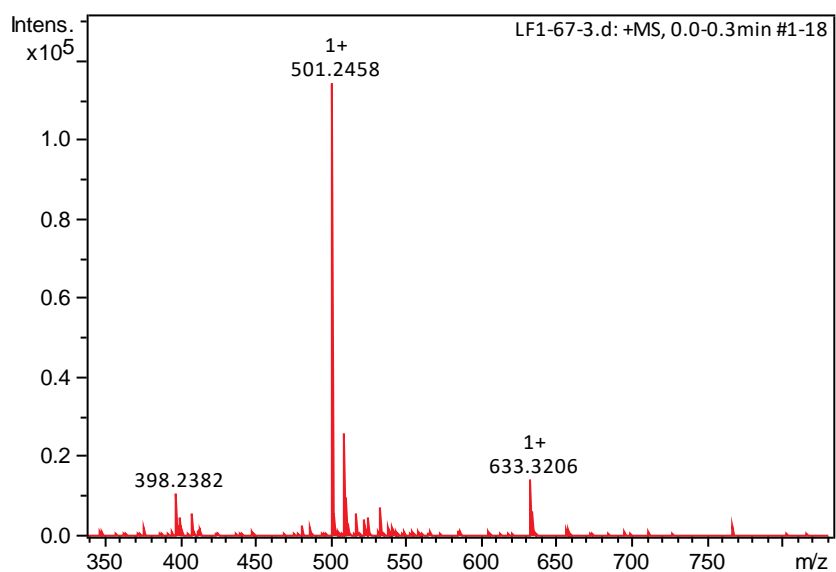

**Figure S22.** HRESIMS spectrum of compound 2.

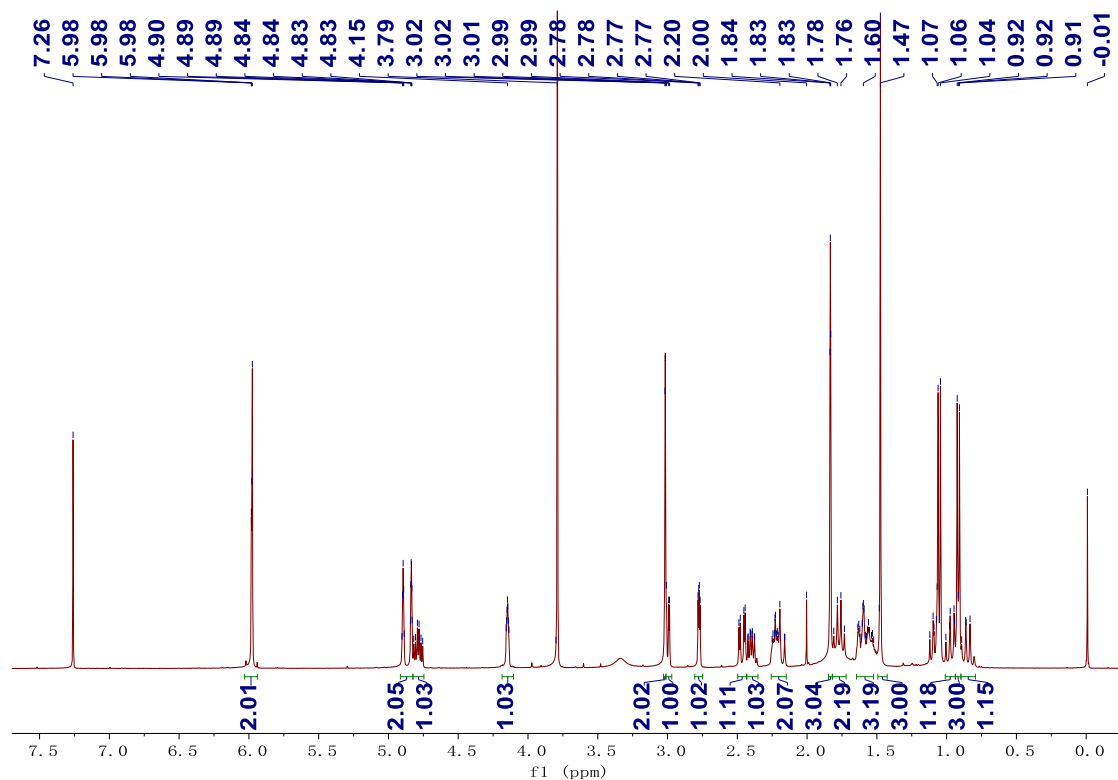

Figure S23.  $^1\text{H}$  NMR spectrum of compound **3** in  $\text{CDCl}_3$ .

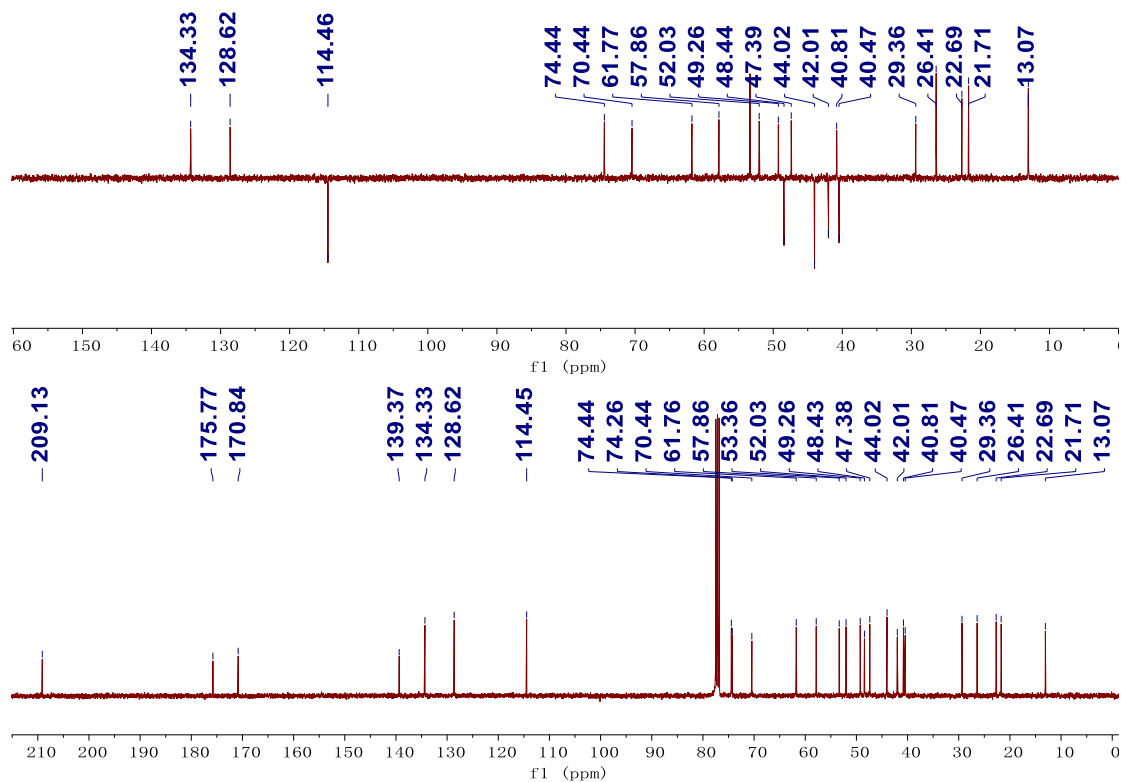

Figure S24.  $^{13}\text{C}$  and DEPT NMR spectra of compound **3** in  $\text{CDCl}_3$ .

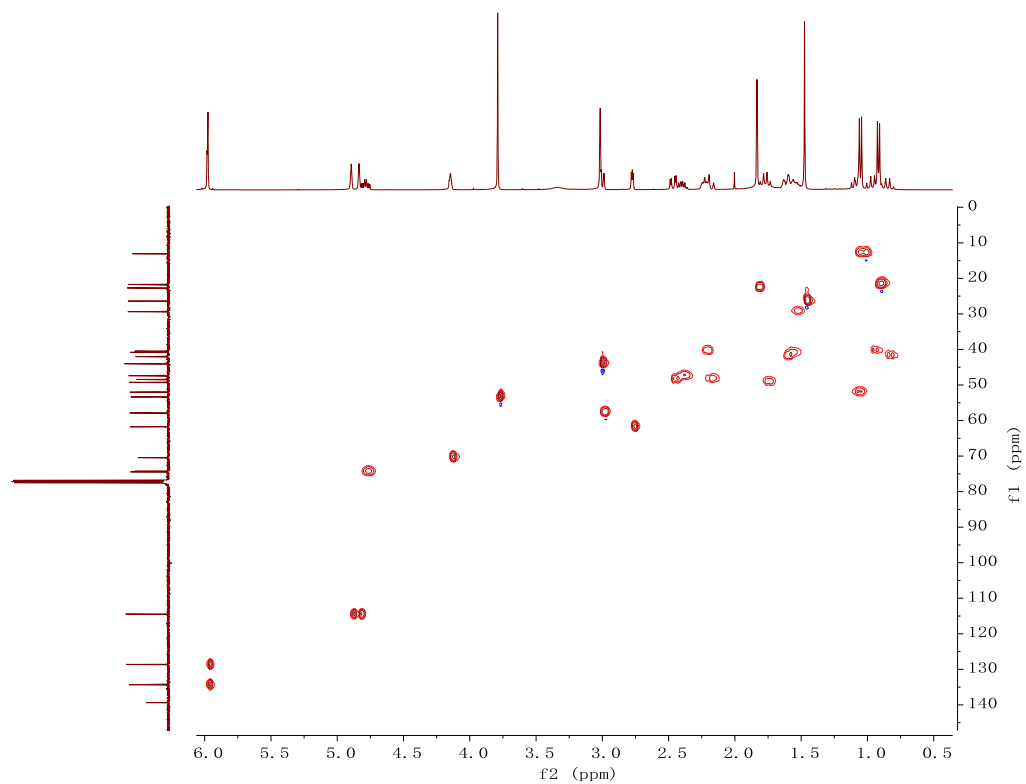

**Figure S25.** HSQC spectrum of compound **3** in CDCl<sub>3</sub>.

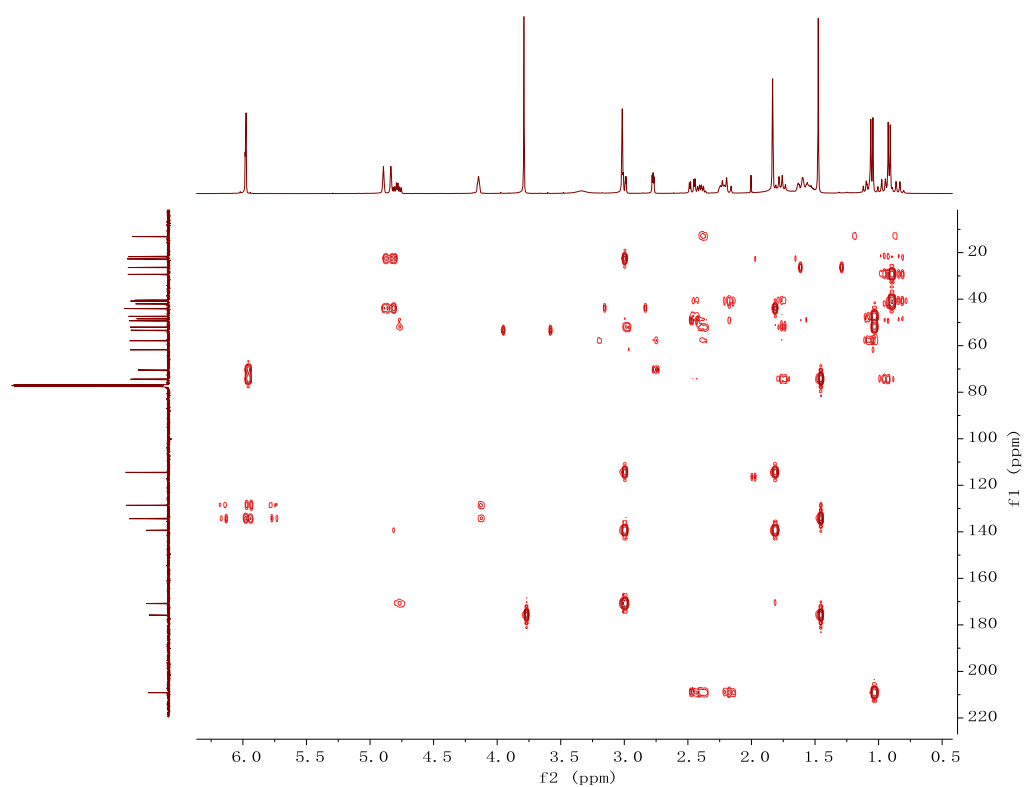

**Figure S26.** HMBC spectrum of compound **3** in CDCl<sub>3</sub>.

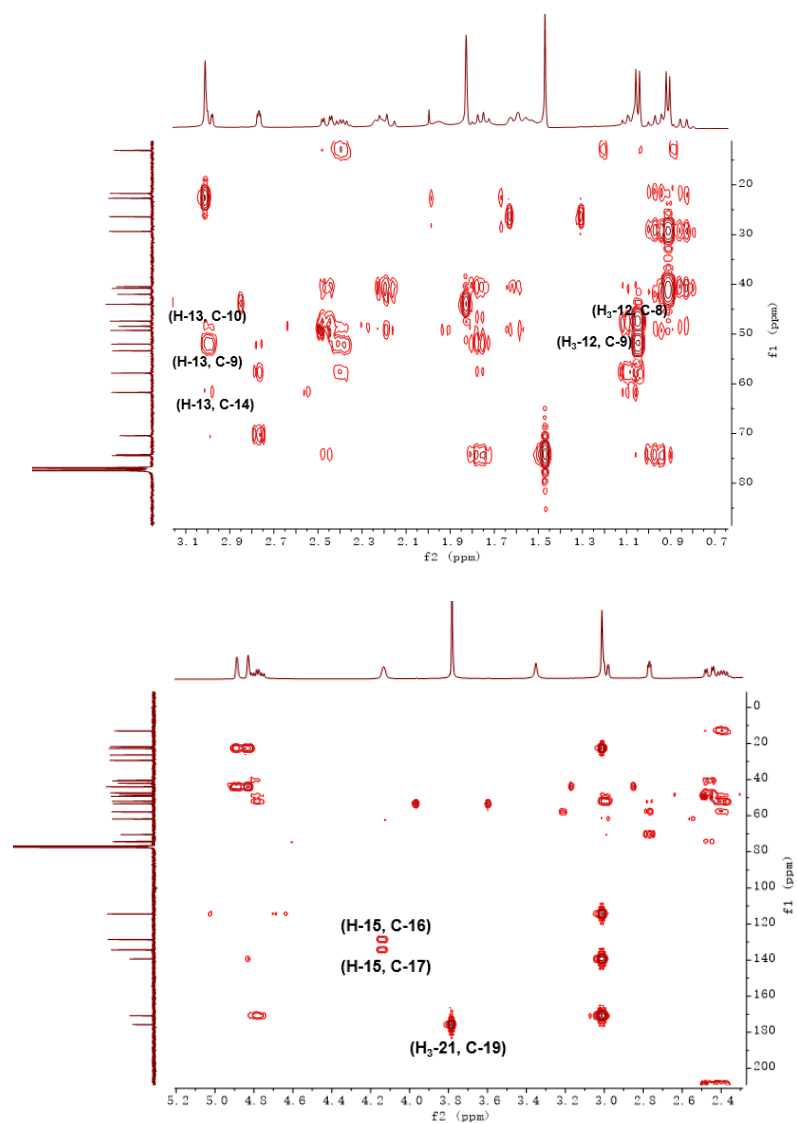

**Figure S27.** Amplified  $^1\text{H}$ - $^{13}\text{C}$  HMBC spectrum of compound **3** in  $\text{CDCl}_3$ .

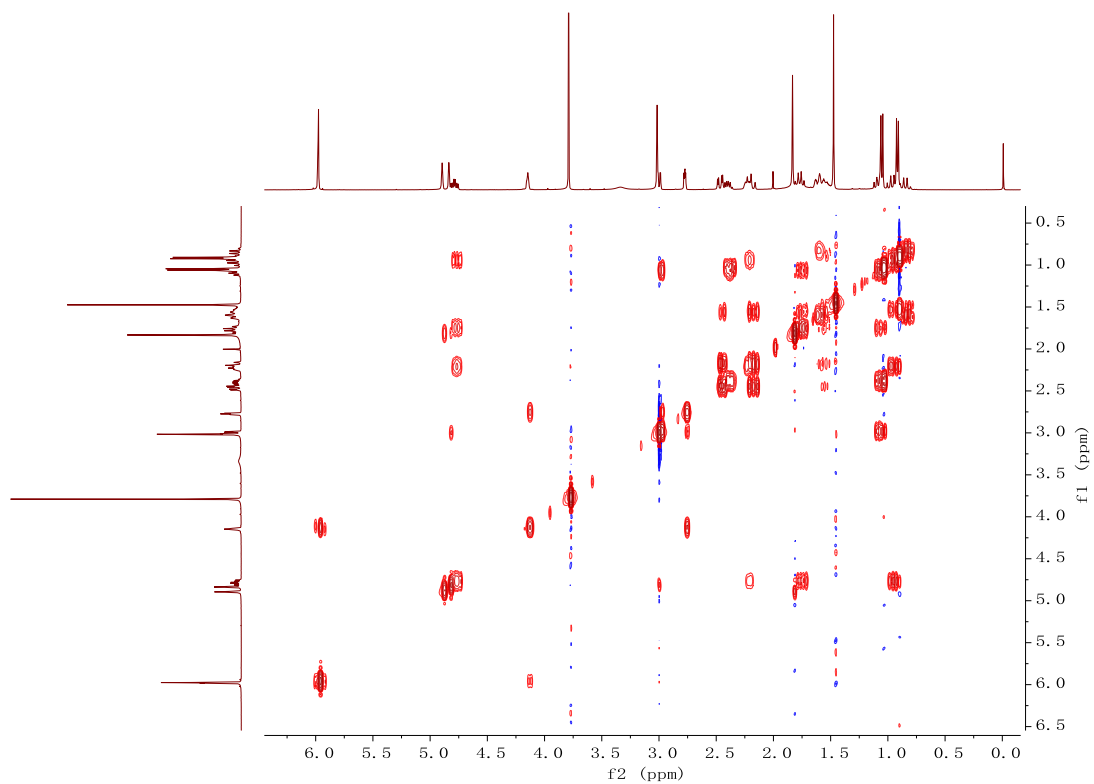

**Figure S28.**  $^1\text{H}$ - $^1\text{H}$  COSY spectrum of compound **3** in  $\text{CDCl}_3$ .

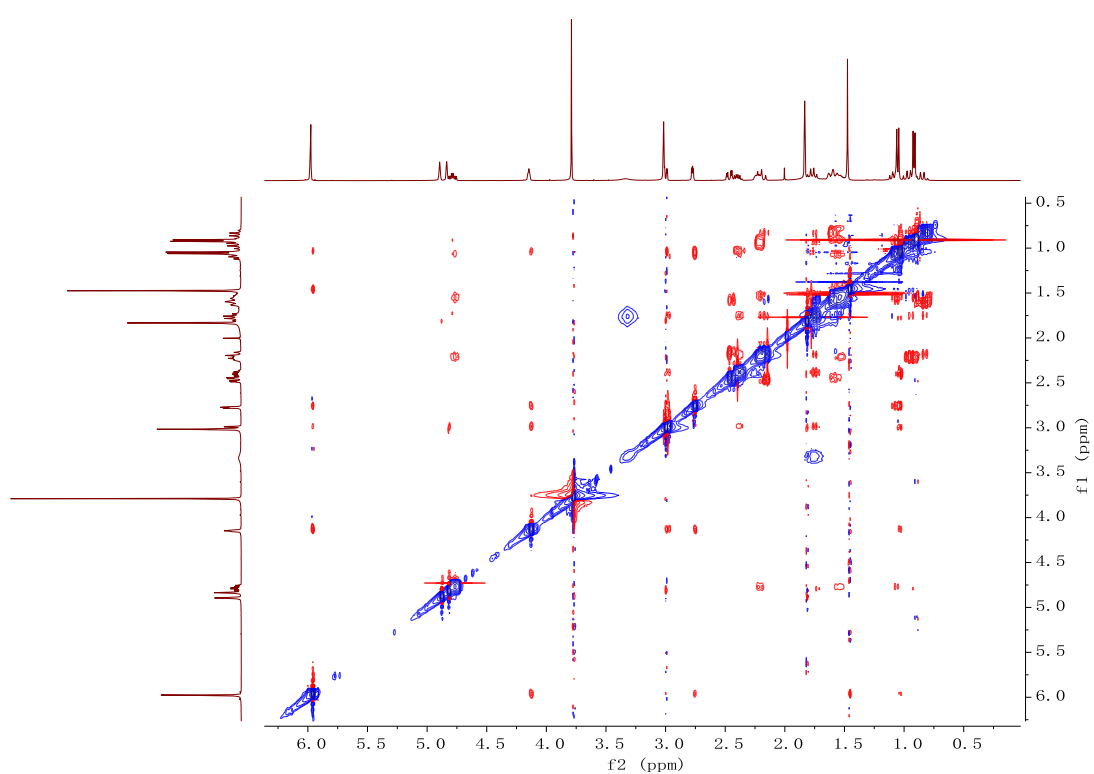

**Figure S29.** NOESY spectrum of compound **3** in  $\text{CDCl}_3$ .

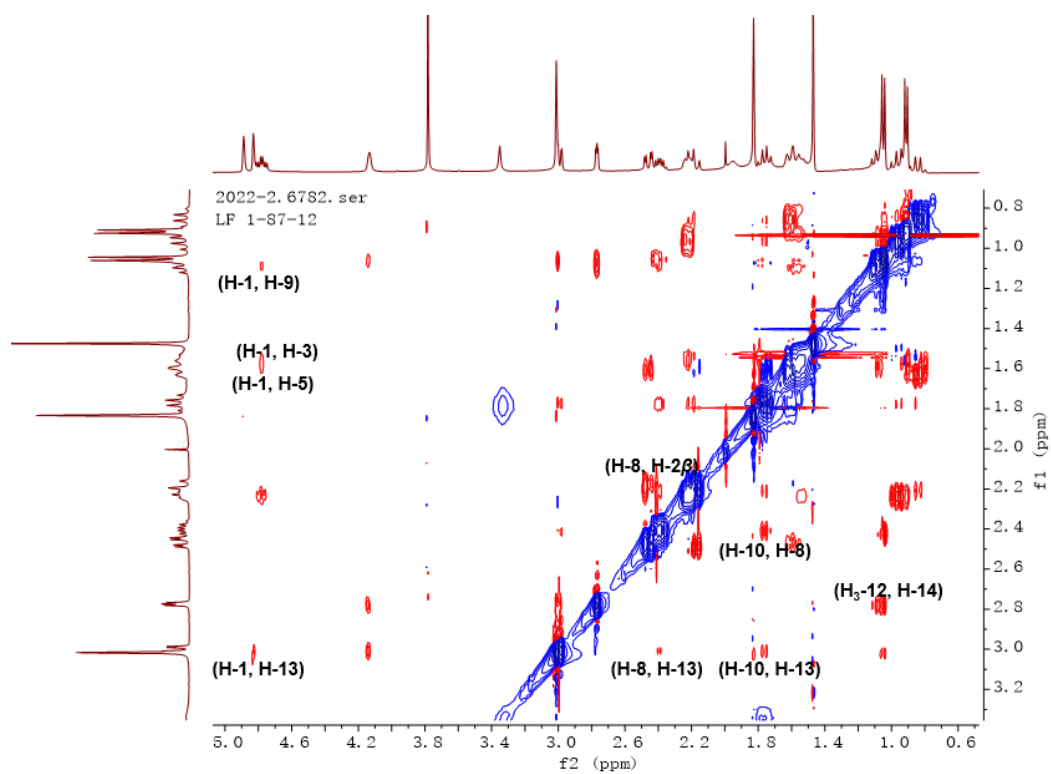

**Figure S30.** Amplified NOESY spectrum of compound **3** in CDCl<sub>3</sub>.

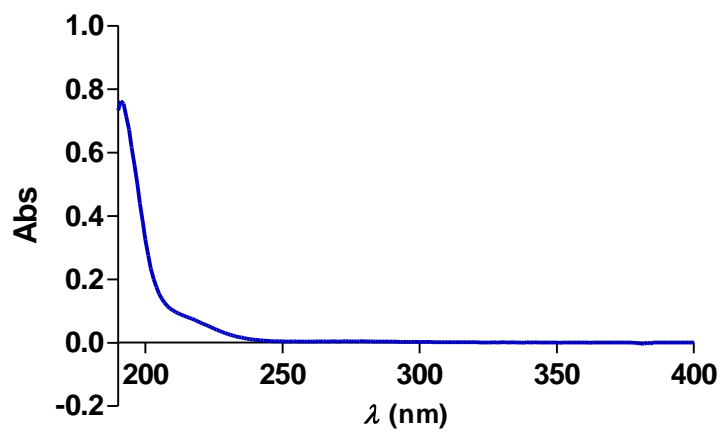

**Figure S31.** UV spectrum of compound **3**.

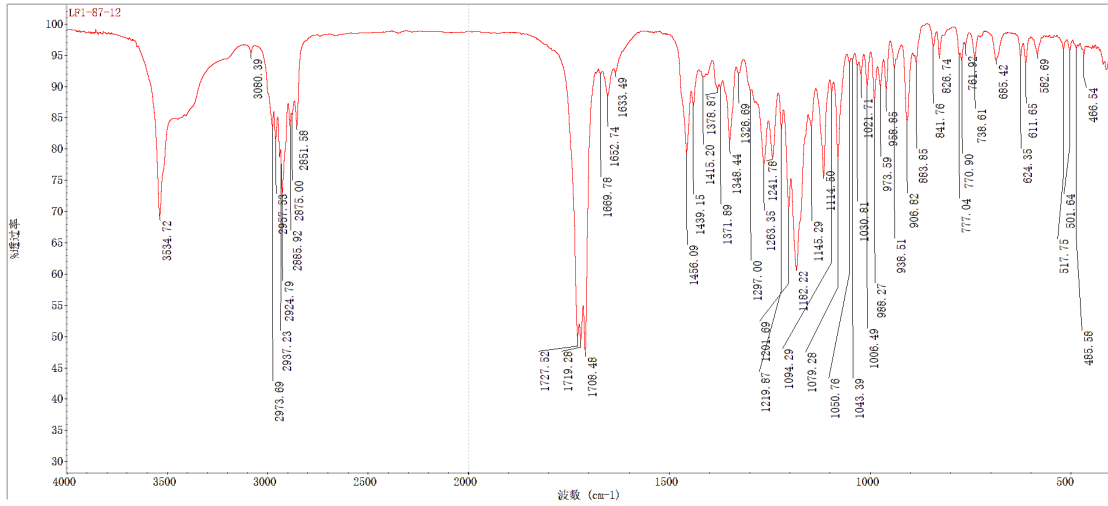

Figure S32. IR spectrum of compound 3.

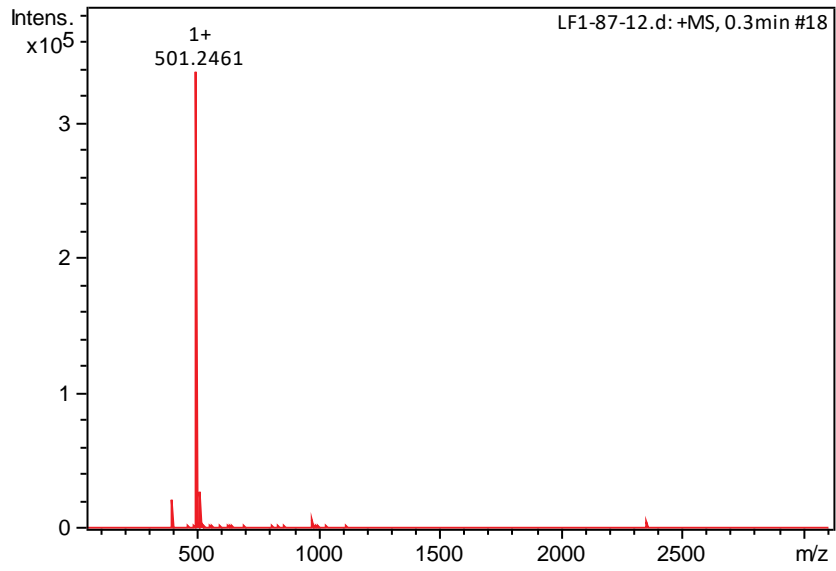

Figure S33. HRESIMS spectrum of compound 3.



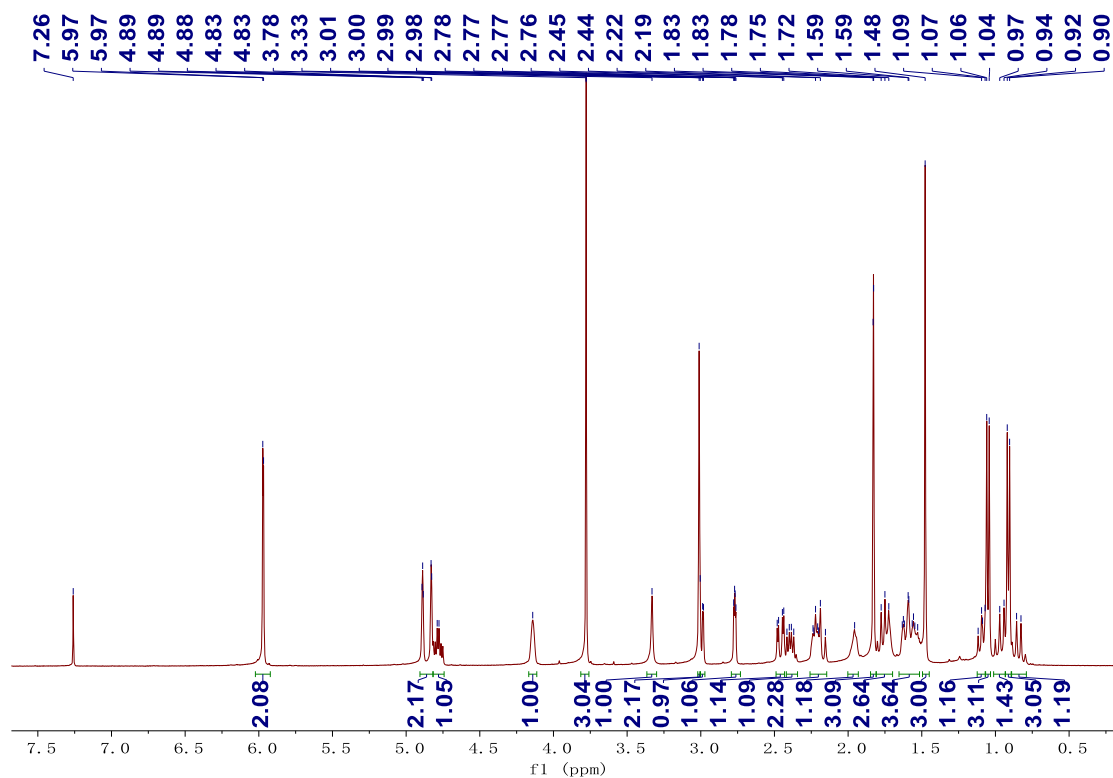

Figure S34.  $^1\text{H}$  NMR spectrum of compound **4** in  $\text{CDCl}_3$ .

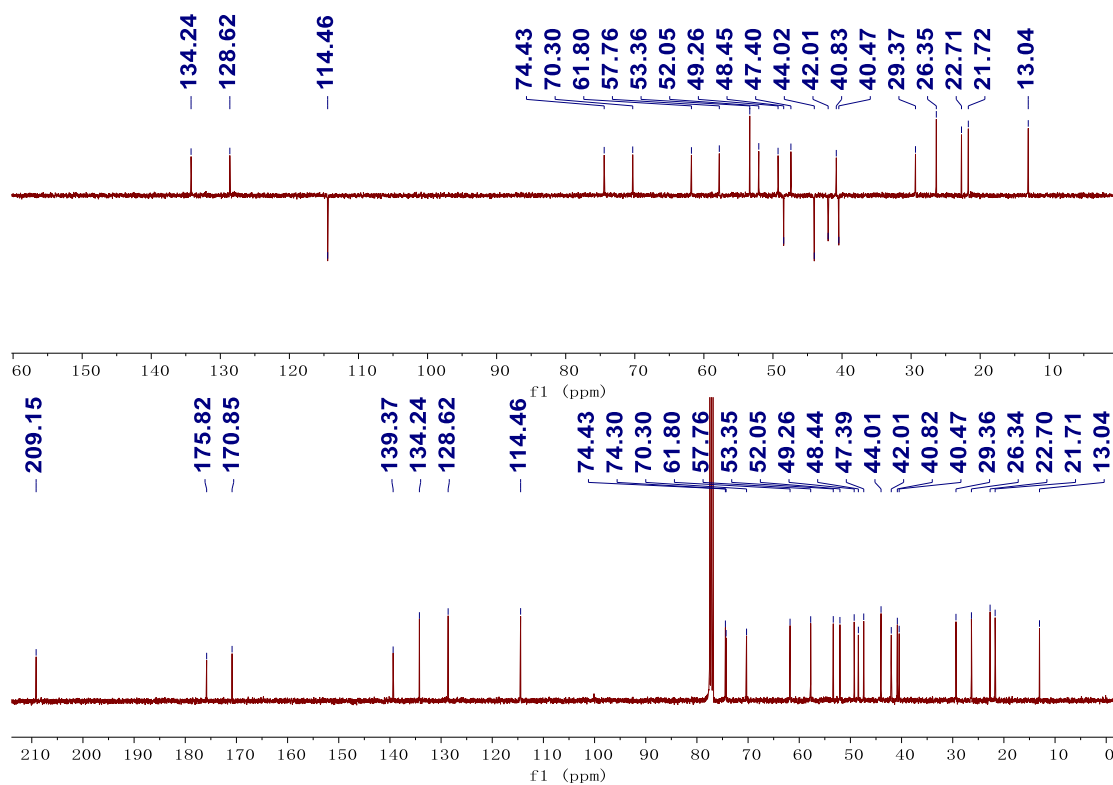

Figure S35.  $^{13}\text{C}$  and DEPT NMR spectra of compound **4** in  $\text{CDCl}_3$ .

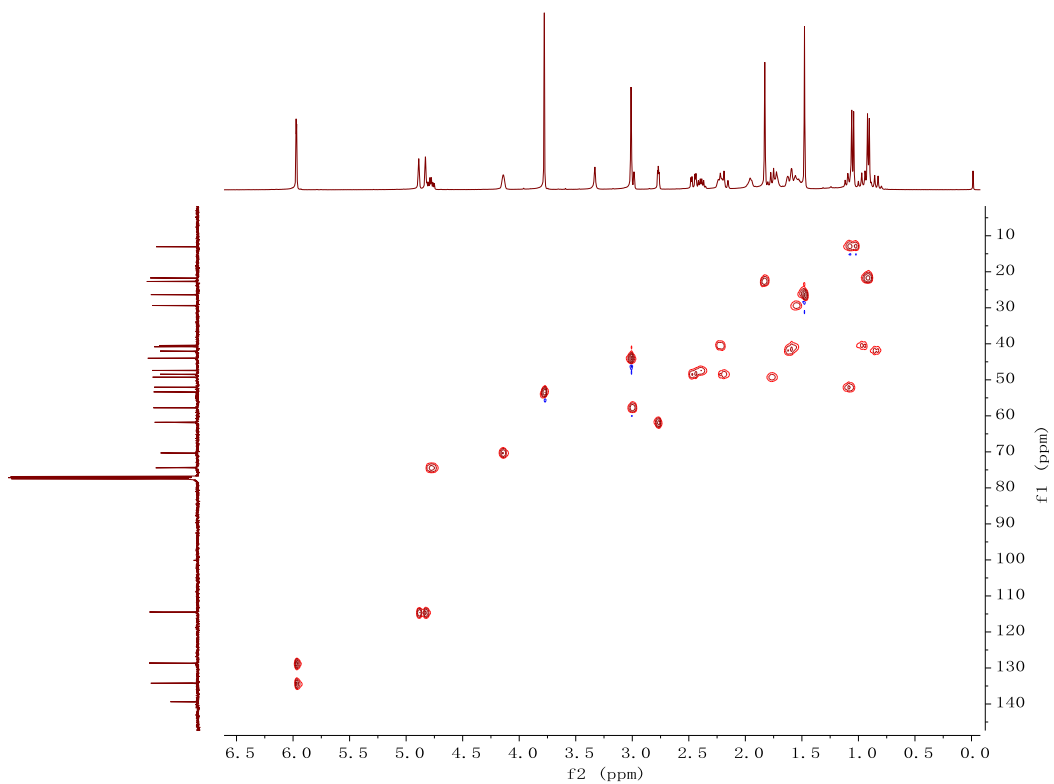

**Figure S36.** HSQC spectrum of compound **4** in  $\text{CDCl}_3$ .

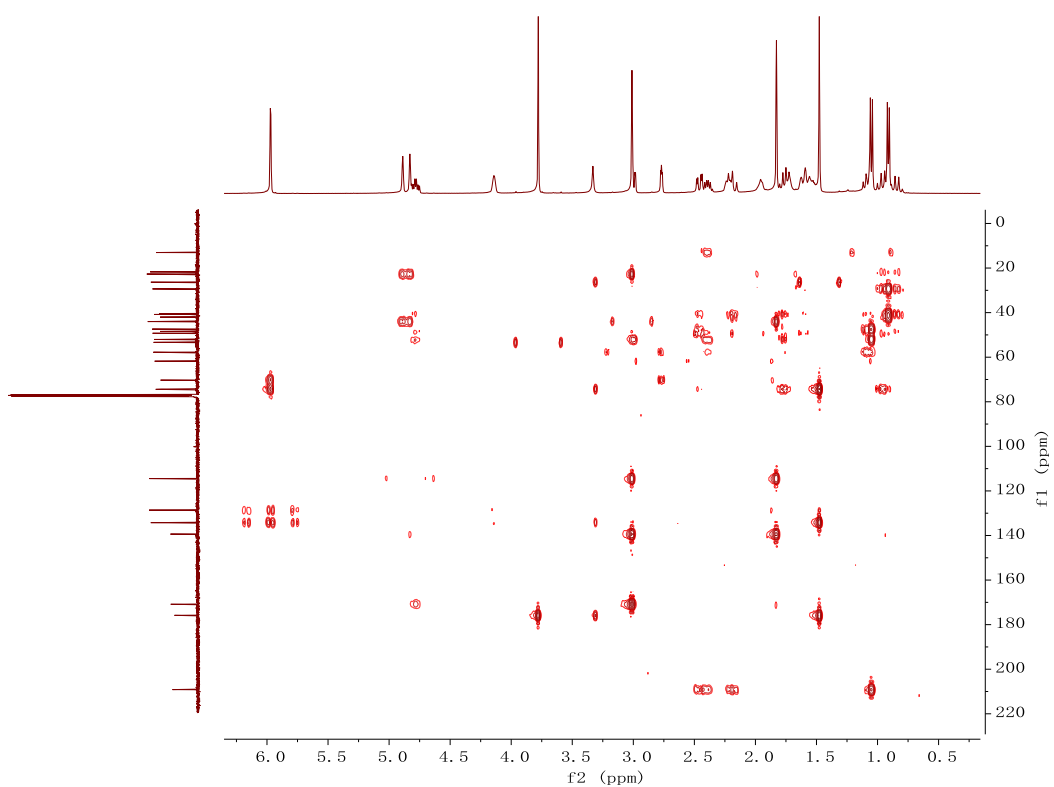

**Figure S37.** HMBC spectrum of compound **4** in  $\text{CDCl}_3$ .

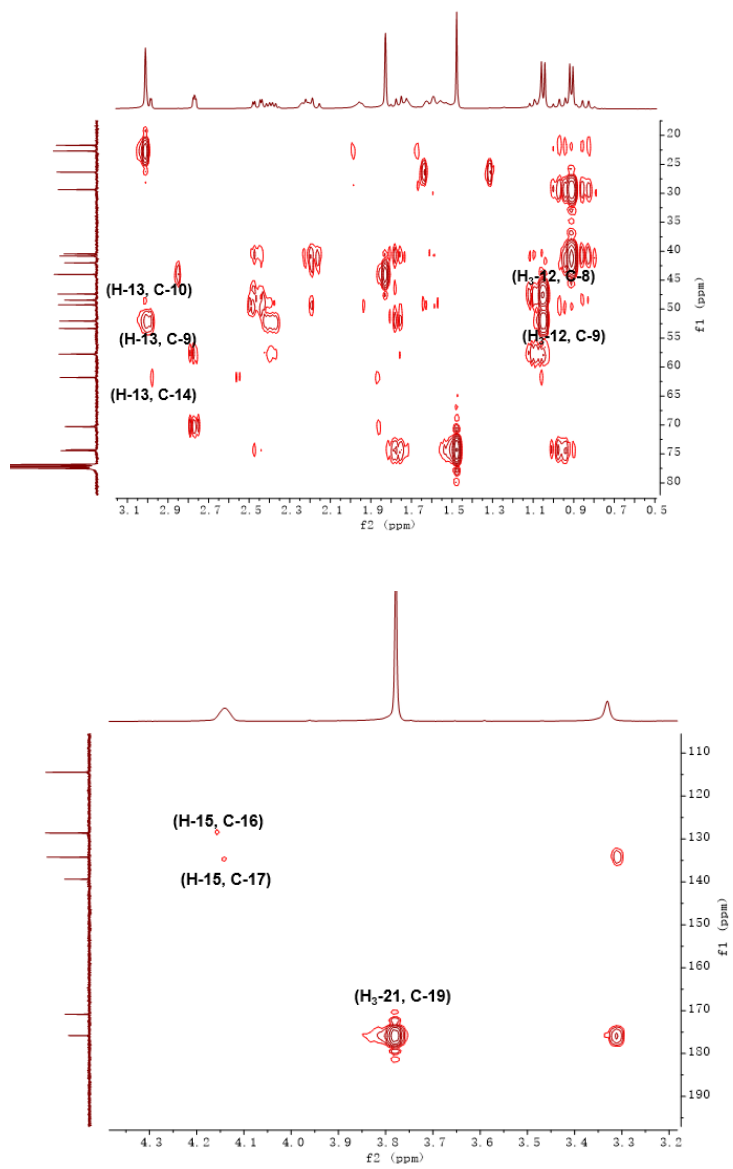

**Figure S38.** Amplified  $^1\text{H}$ - $^{13}\text{C}$  HMBC spectrum of compound **4** in  $\text{CDCl}_3$ .

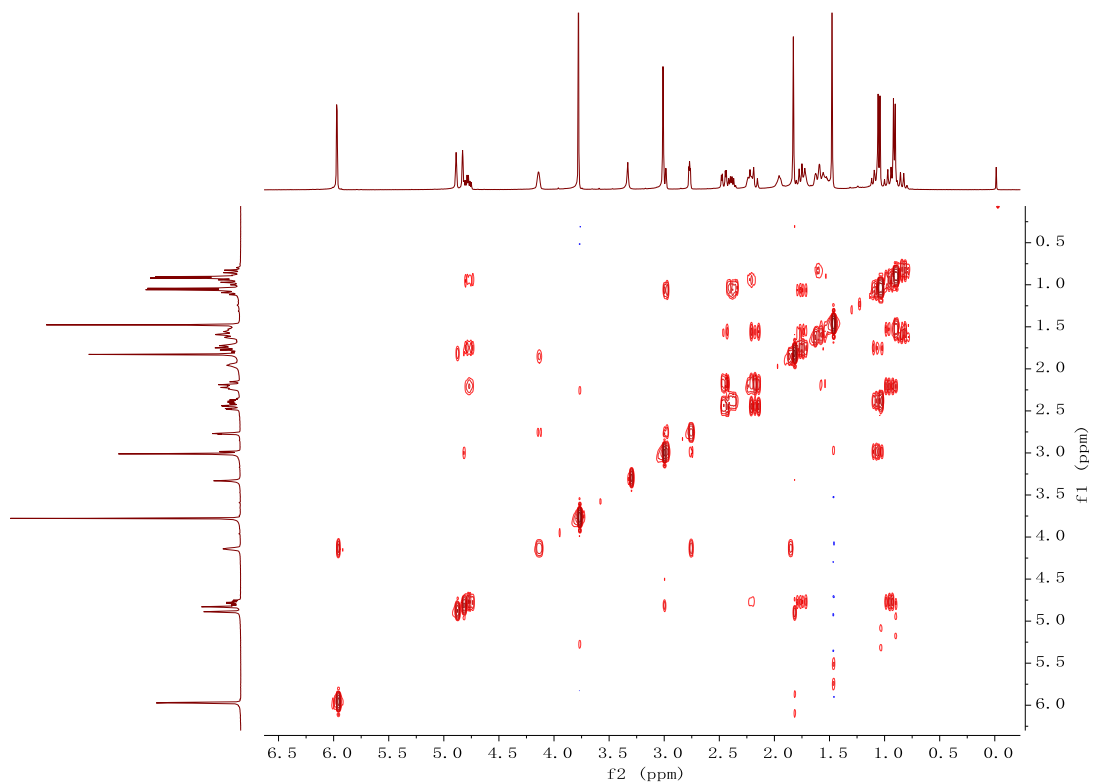

**Figure S39.**  $^1\text{H}$ - $^1\text{H}$  COSY spectrum of compound **4** in  $\text{CDCl}_3$ .

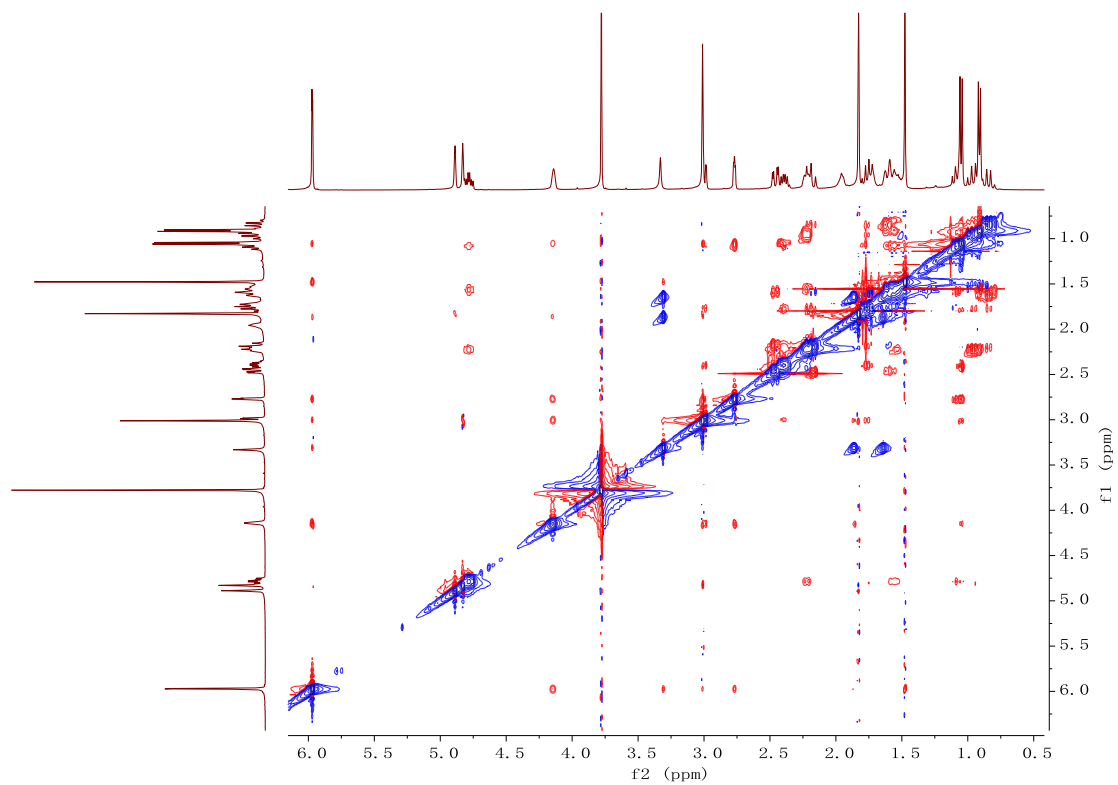

**Figure S40.** NOESY spectrum of compound **4** in  $\text{CDCl}_3$ .

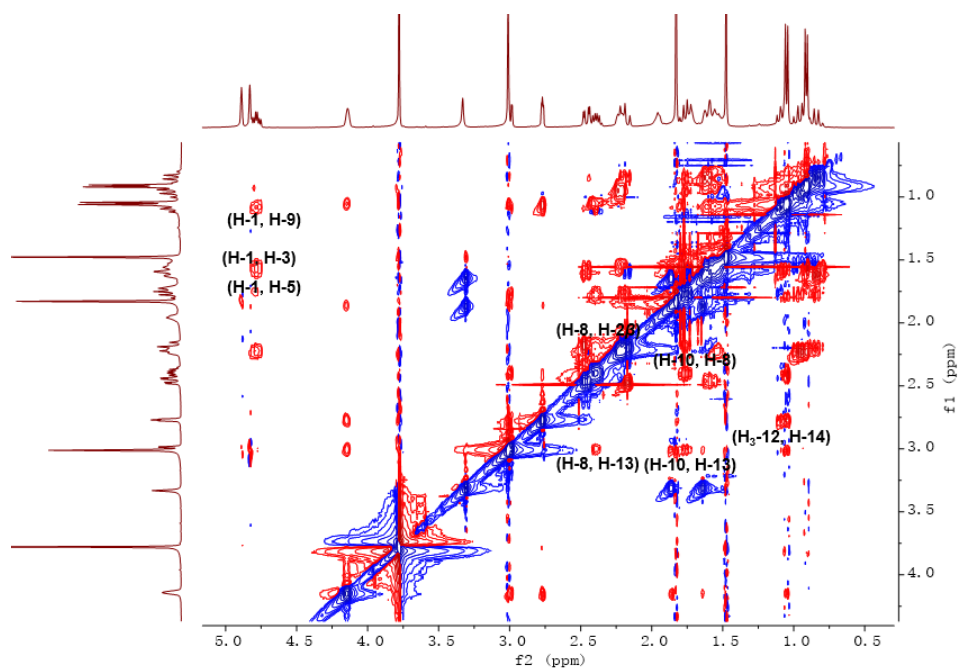

**Figure S41.** Amplified NOESY spectrum of compound 4 in CDCl<sub>3</sub>.

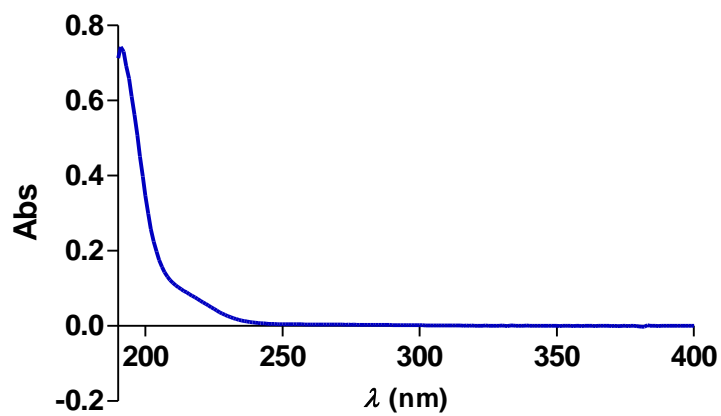

**Figure S42.** UV spectrum of compound 4.

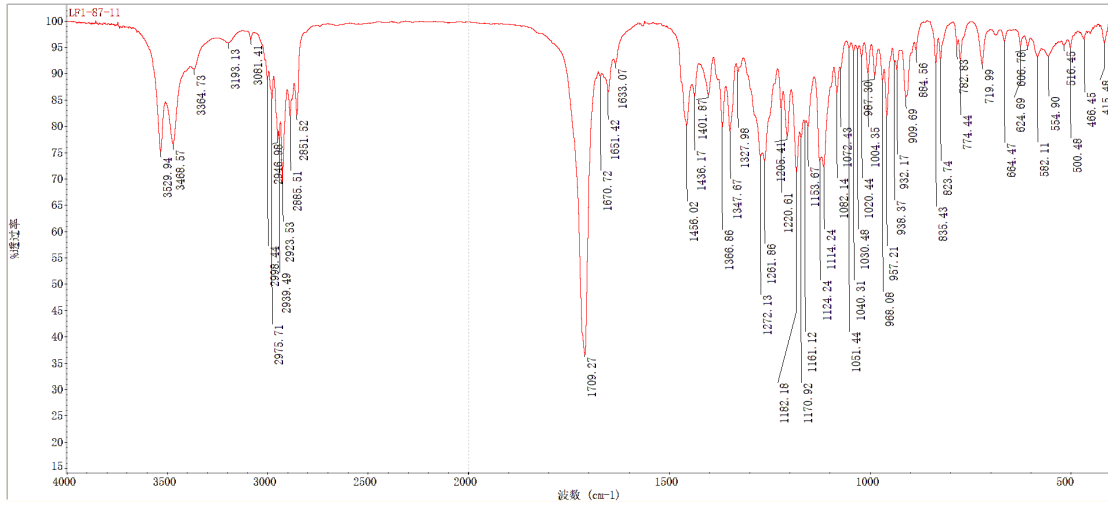

**Figure S43.** IR spectrum of compound **4**.

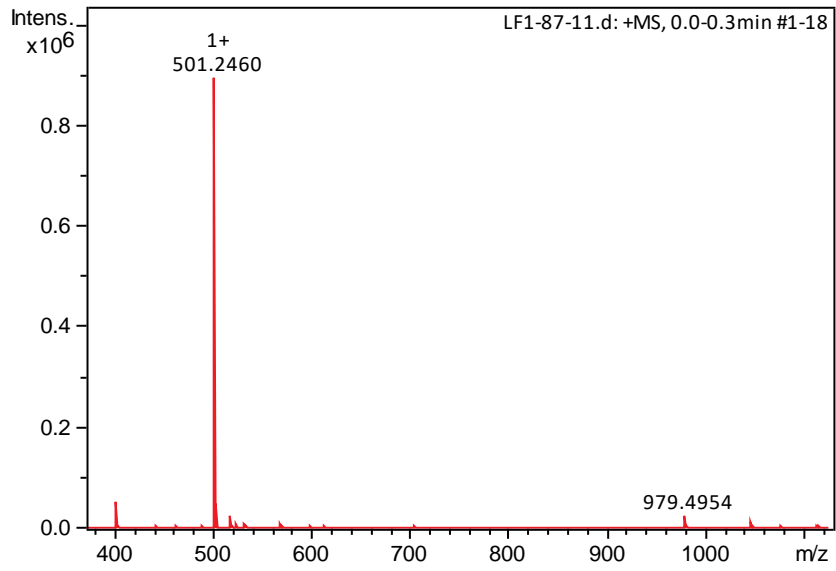

**Figure S44.** HRESIMS spectrum of compound **4**.

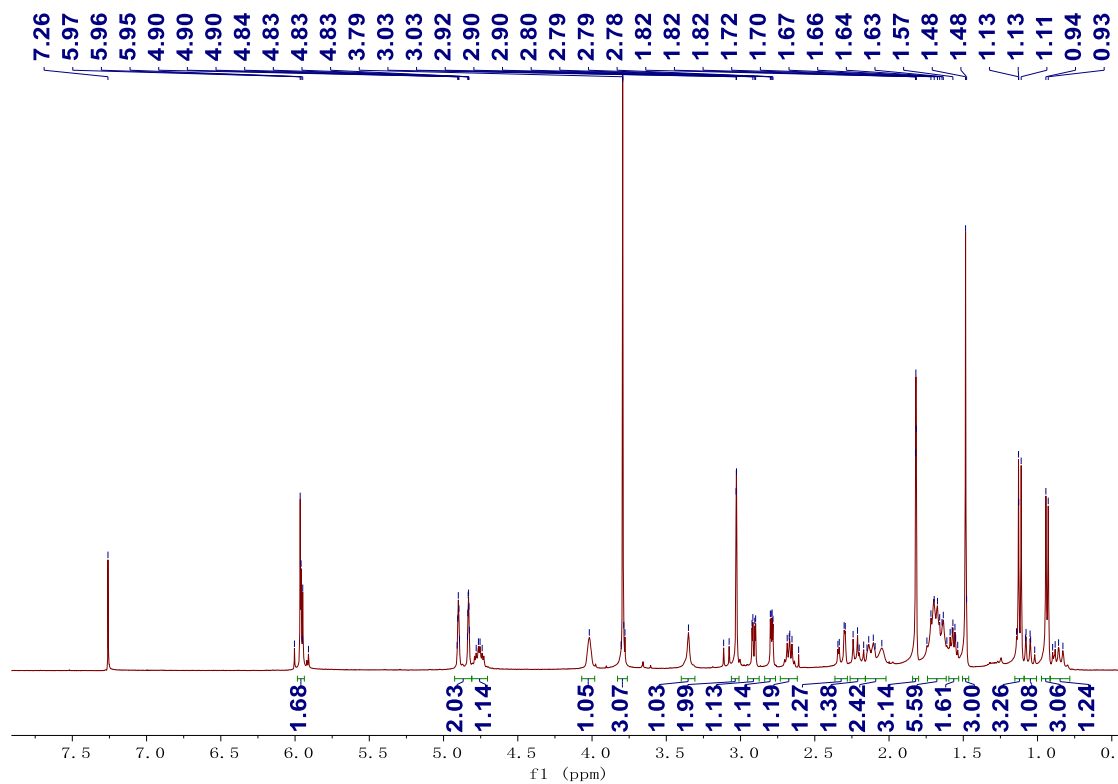

Figure S45.  $^1\text{H}$  NMR spectrum of compound **5** in  $\text{CDCl}_3$ .

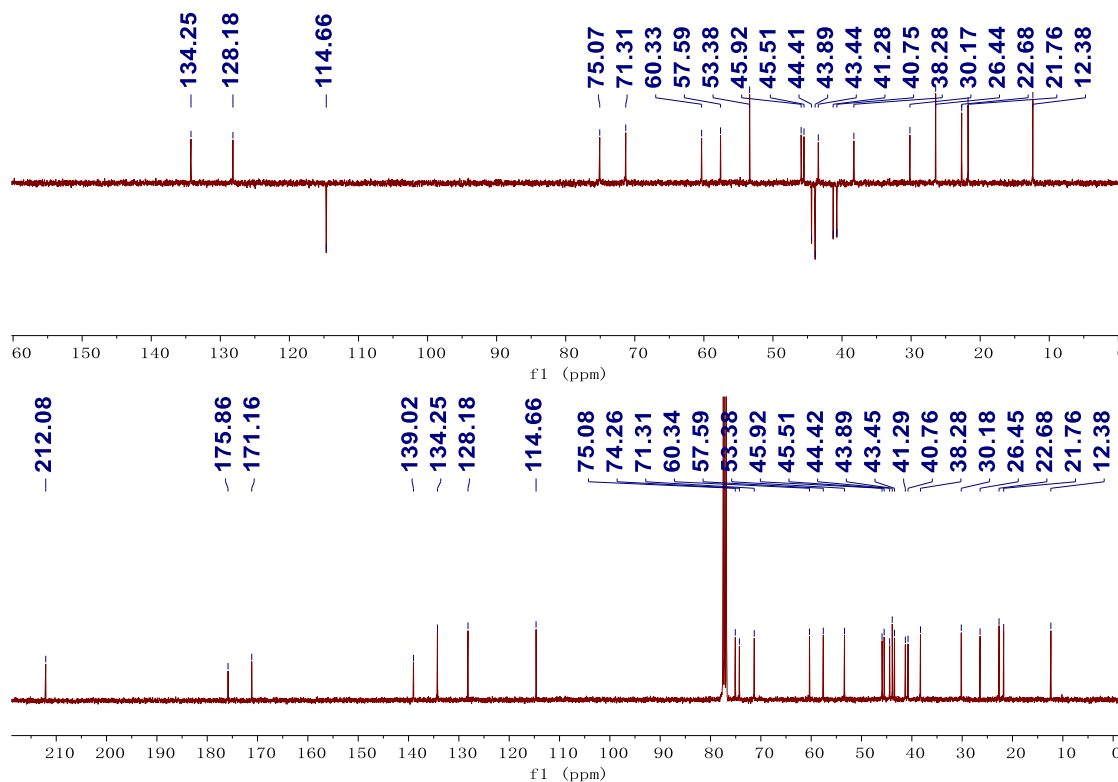

Figure S46.  $^{13}\text{C}$  and DEPT NMR spectra of compound **5** in  $\text{CDCl}_3$ .

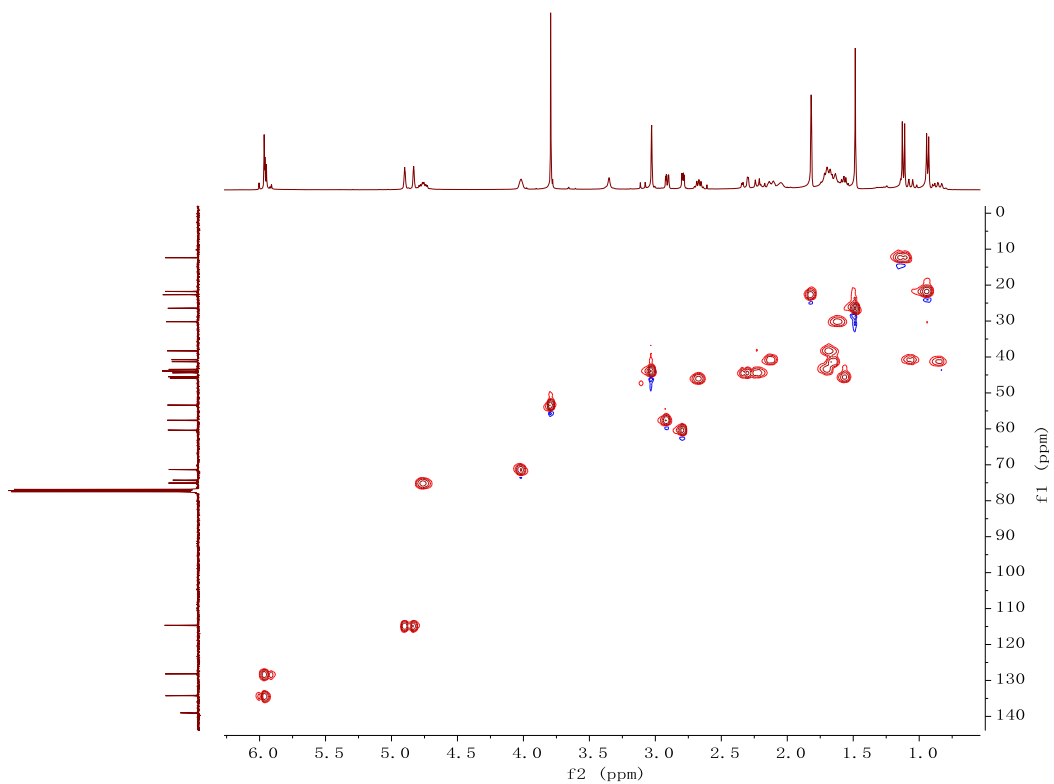

**Figure S47.** HSQC spectrum of compound **5** in  $\text{CDCl}_3$ .

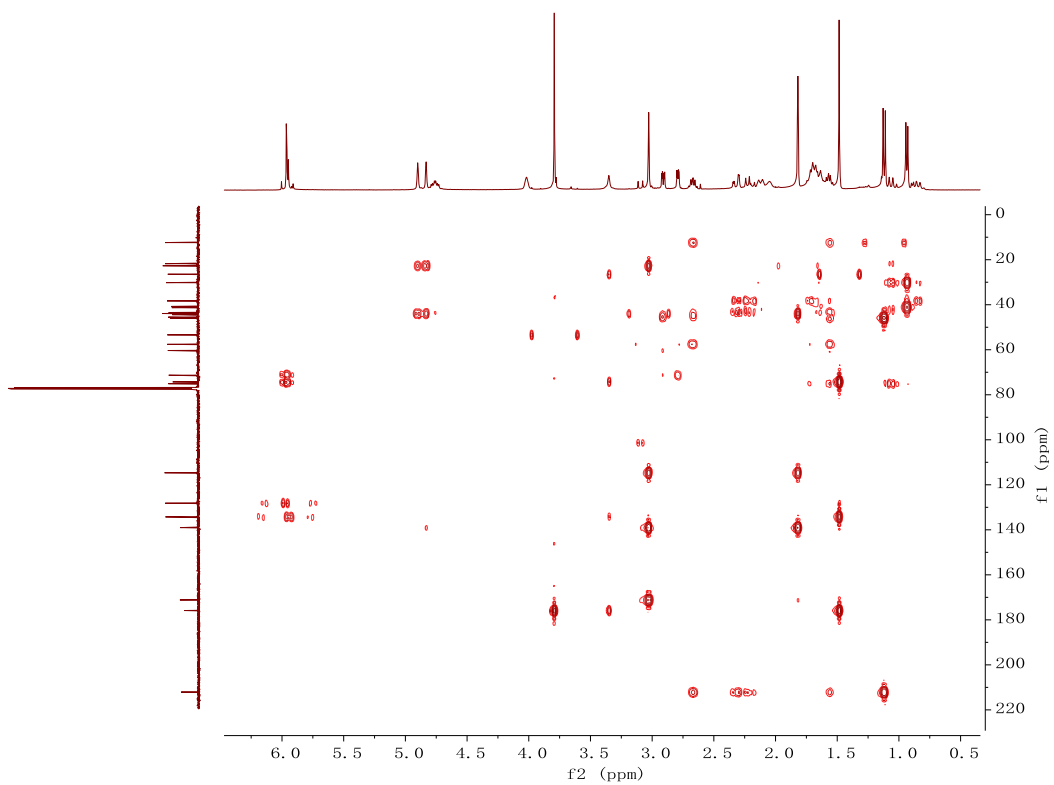

**Figure S48.** HMBC spectrum of compound **5** in  $\text{CDCl}_3$ .



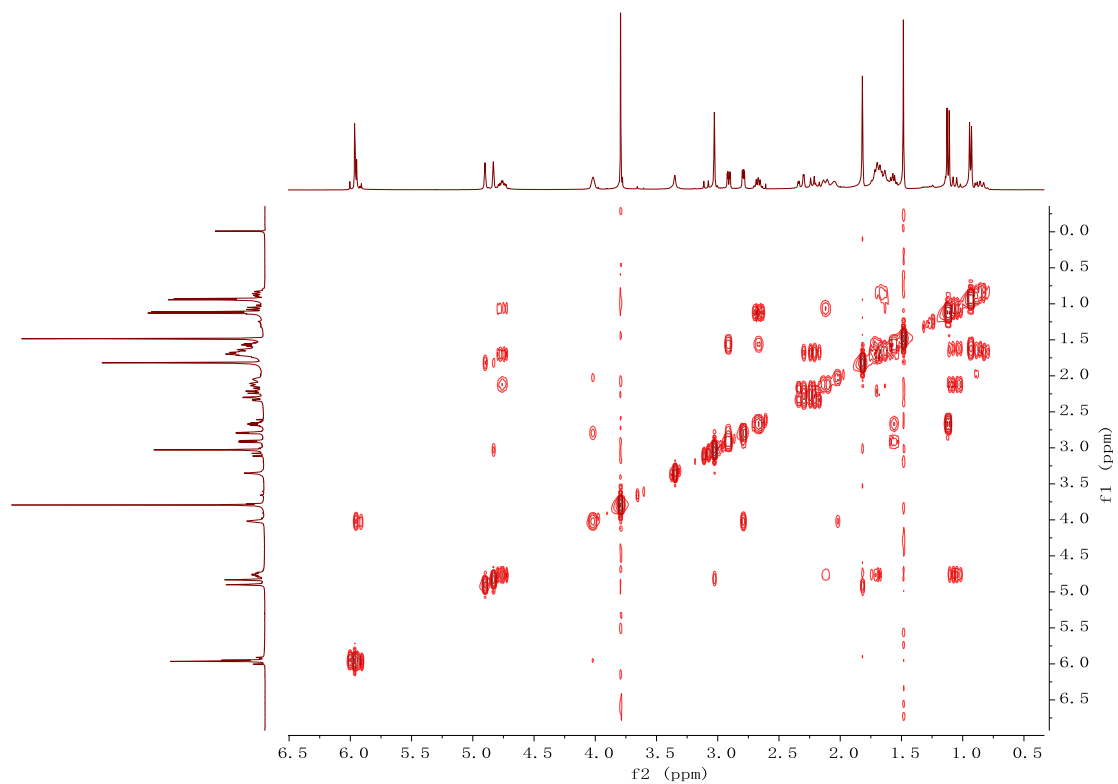

**Figure S49.**  $^1\text{H}$ - $^1\text{H}$  COSY spectrum of compound **5** in  $\text{CDCl}_3$ .

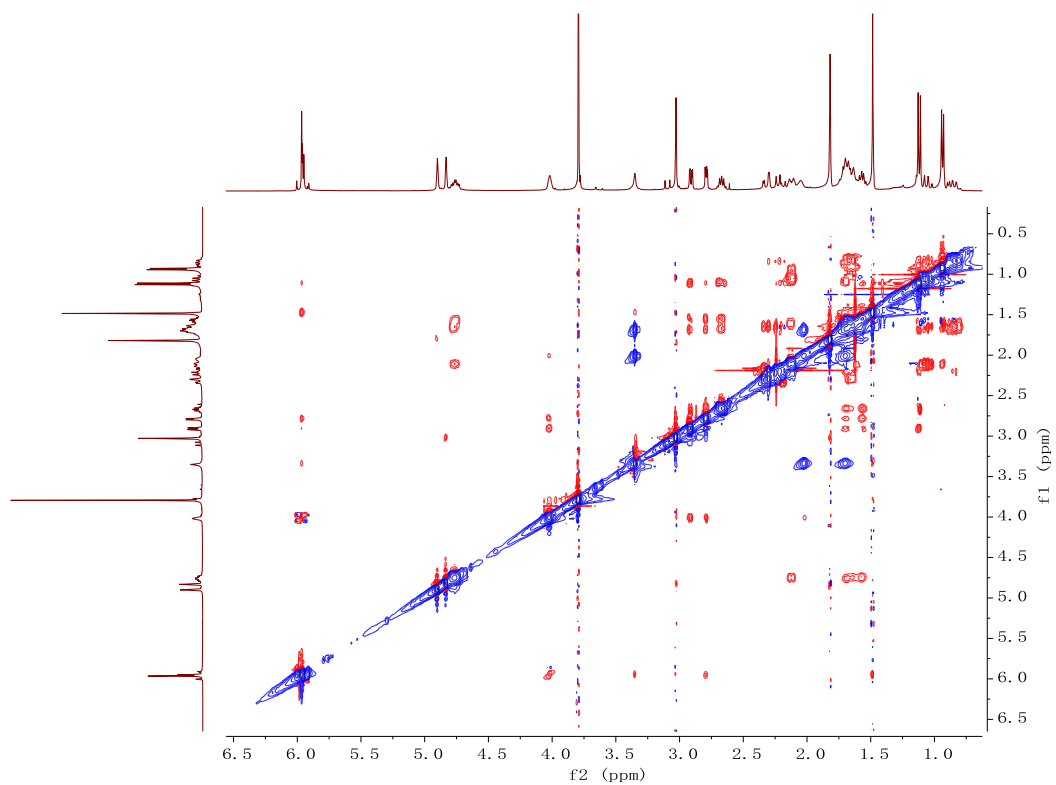

**Figure S50.** NOESY spectrum of compound **5** in  $\text{CDCl}_3$ .

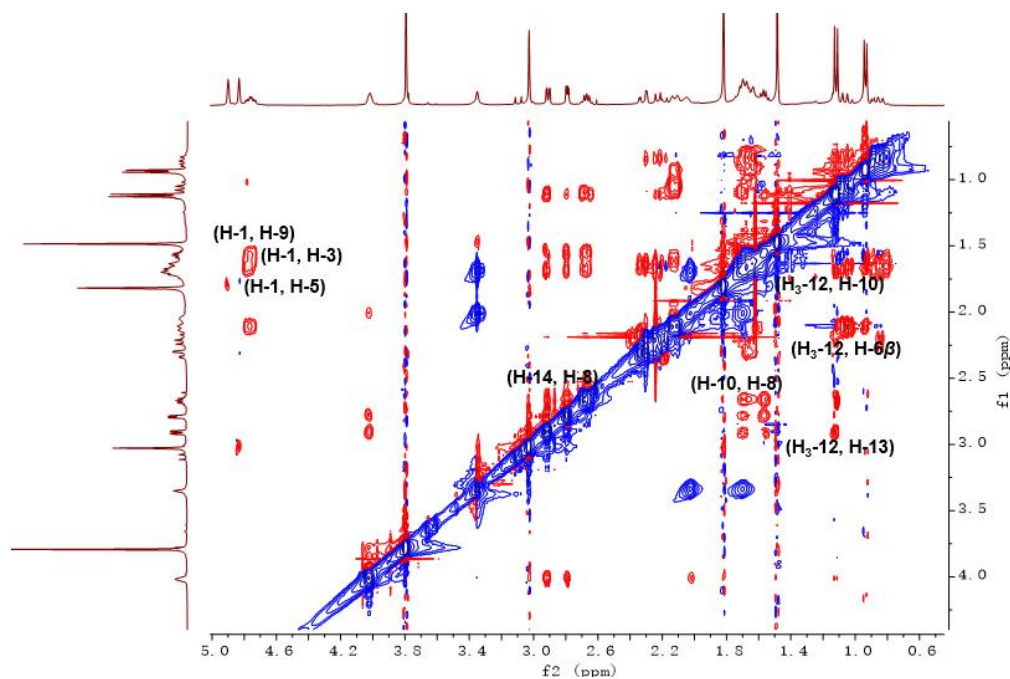

**Figure S51.** Amplified NOESY spectrum of compound **5** in  $\text{CDCl}_3$ .

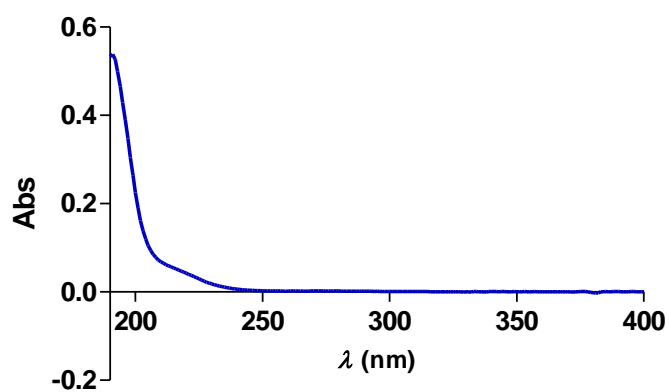

**Figure S52.** UV spectrum of compound **5**.

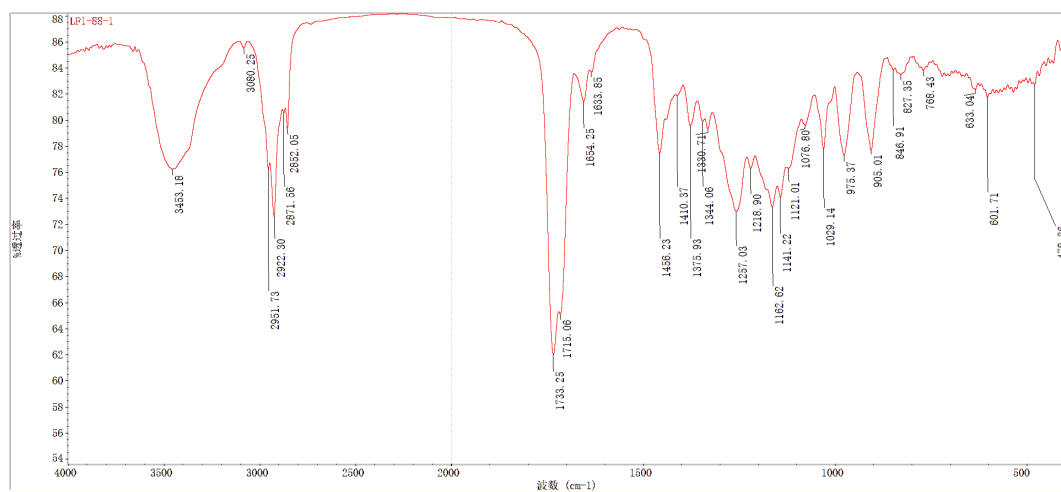

**Figure S53.** IR spectrum of compound **5**.

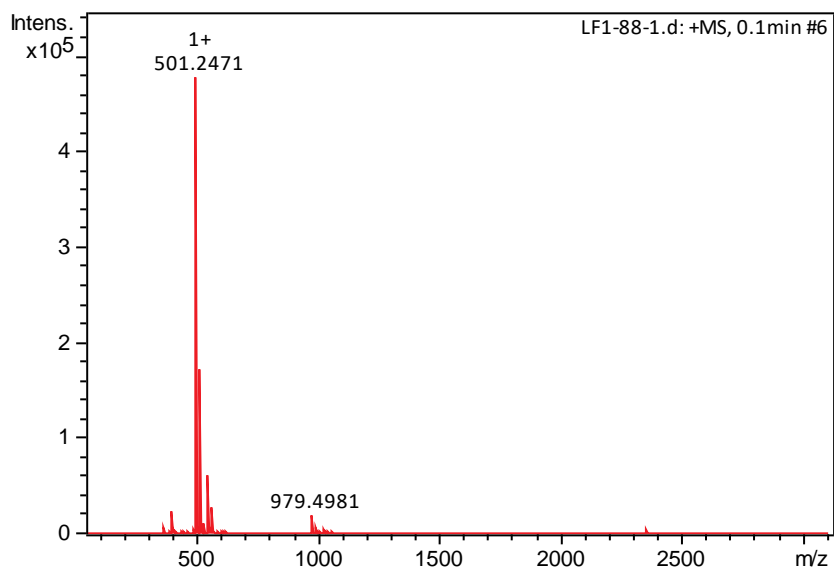

Figure S54. HRESIMS spectrum of compound 5.

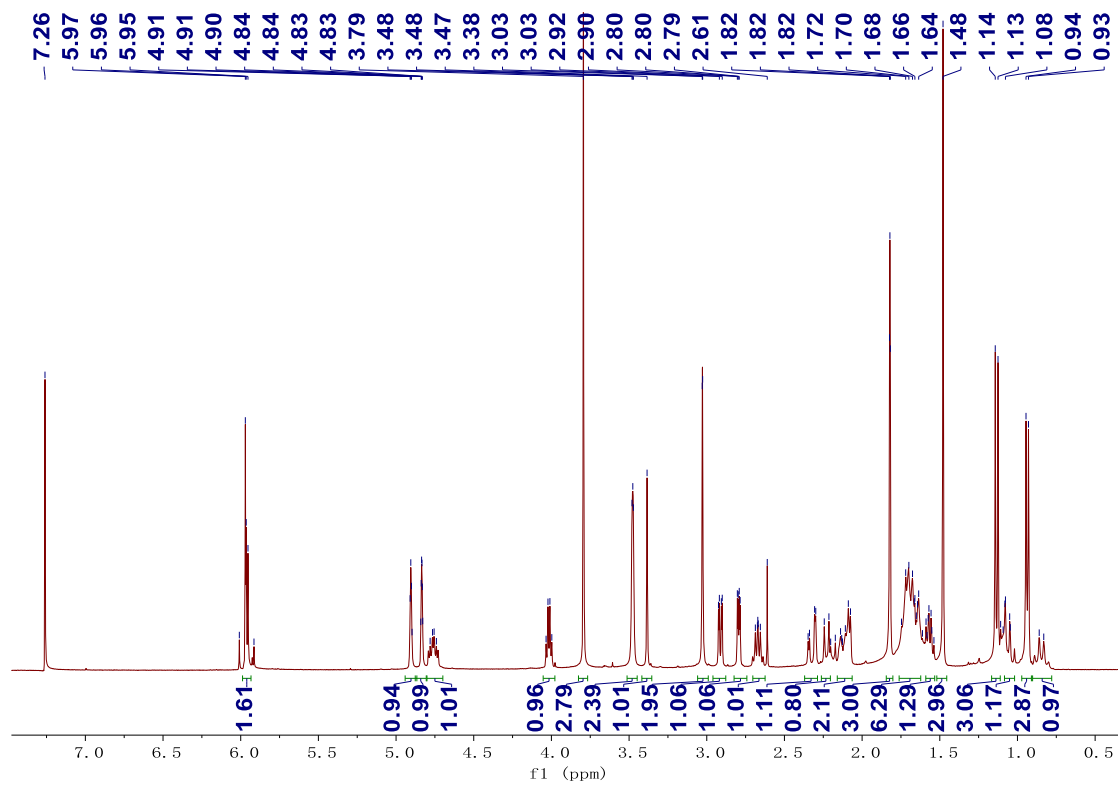

Figure S55.  $^1\text{H}$  NMR spectrum of compound 6 in  $\text{CDCl}_3$ .

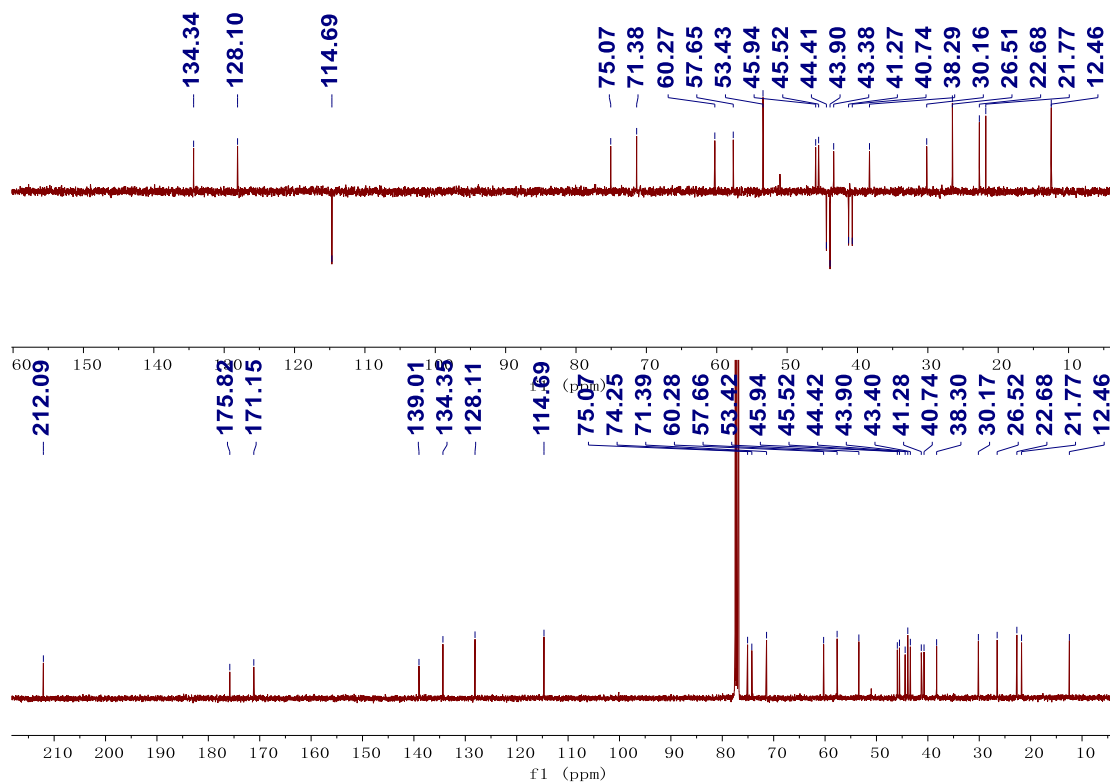

**Figure S56.** <sup>13</sup>C and DEPT NMR spectrum of compound **6** in CDCl<sub>3</sub>.

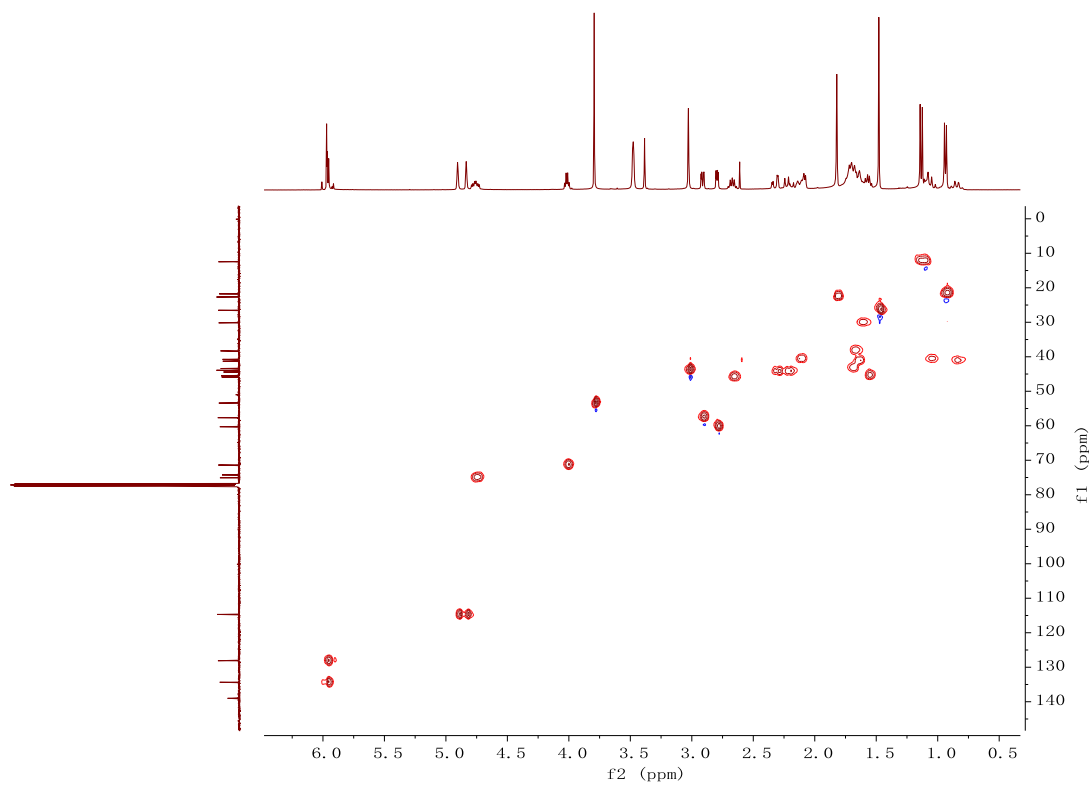

**Figure S57.** HSQC spectrum of compound **6** in CDCl<sub>3</sub>.

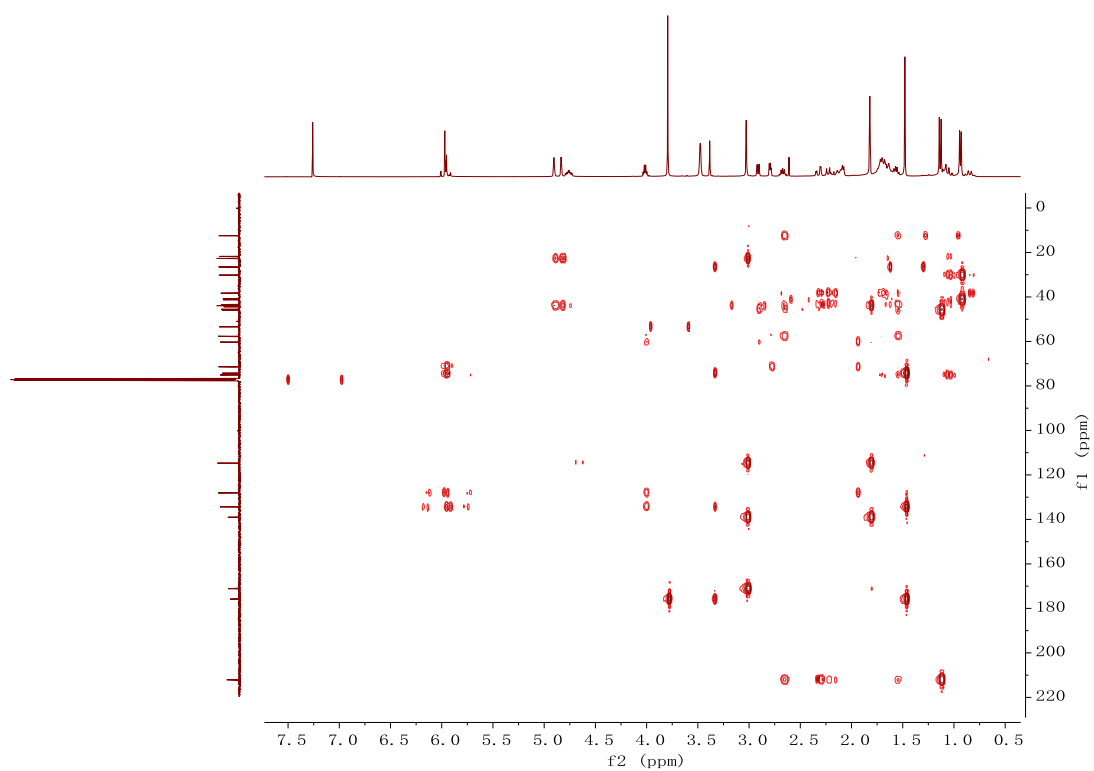

**Figure S58.** HMBC spectrum of compound **6** in CDCl<sub>3</sub>.

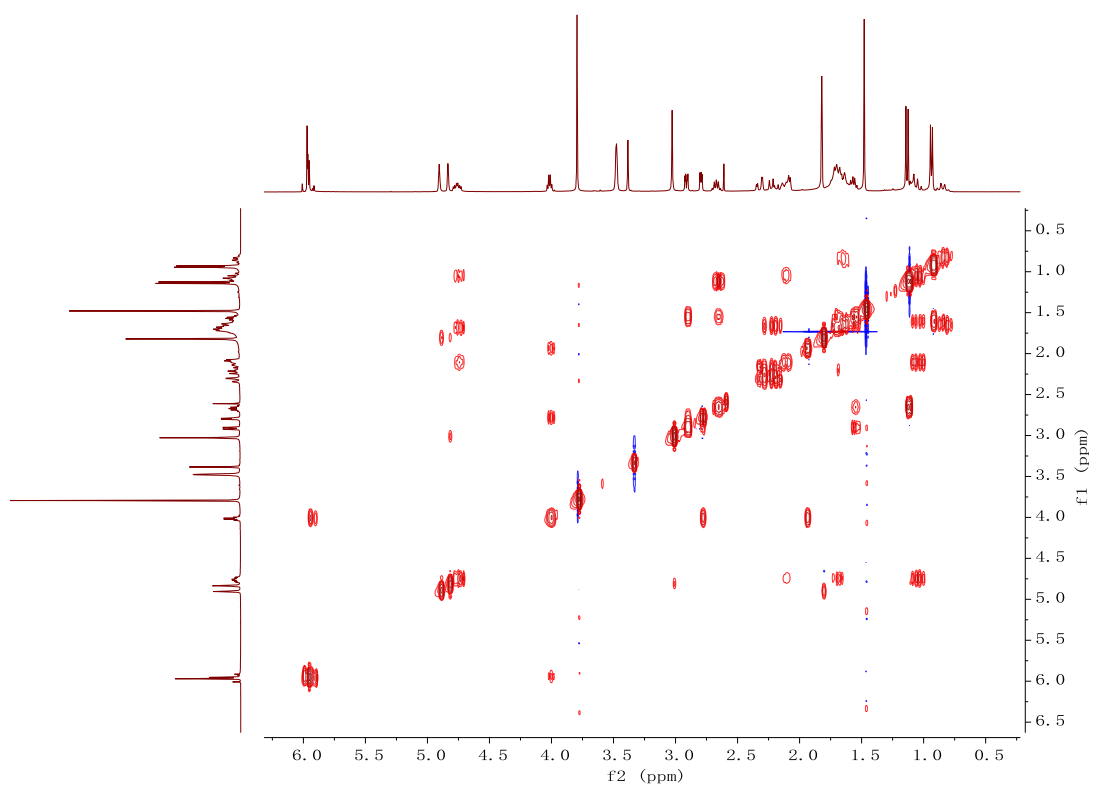

**Figure S59.** <sup>1</sup>H-<sup>1</sup>H COSY spectrum of compound **6** in CDCl<sub>3</sub>.

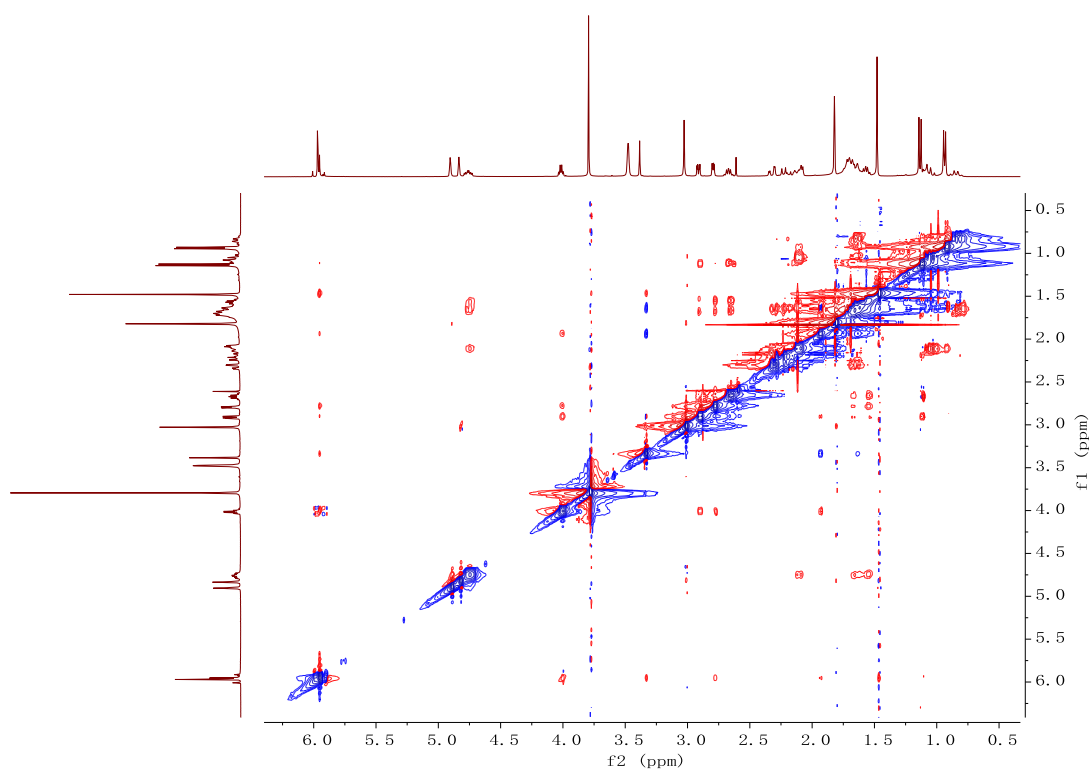

**Figure S60.** NOESY spectrum of compound **6** in  $\text{CDCl}_3$ .

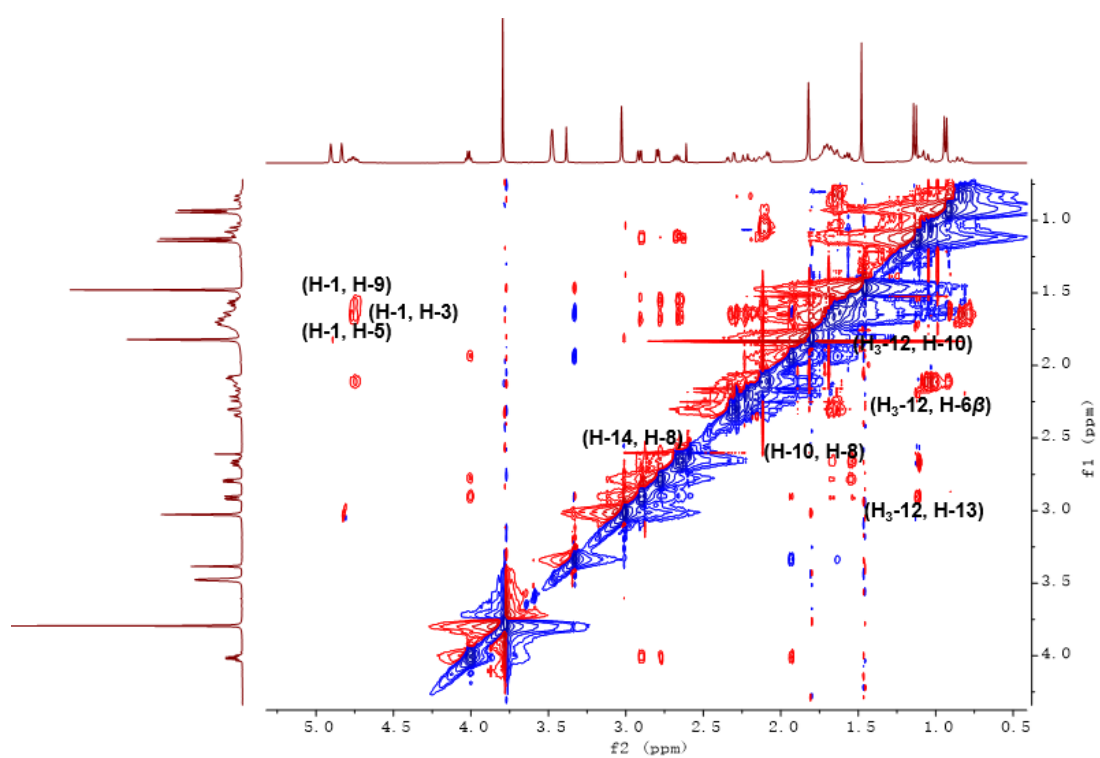

**Figure S61.** Amplified NOESY spectrum of compound **6** in  $\text{CDCl}_3$ .

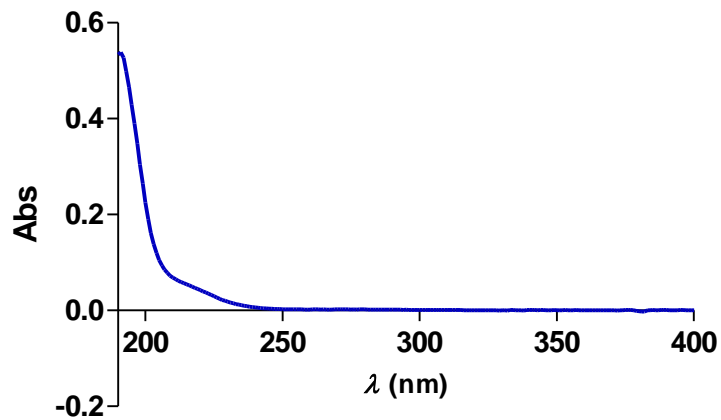

Figure S62. UV spectrum of compound 6.

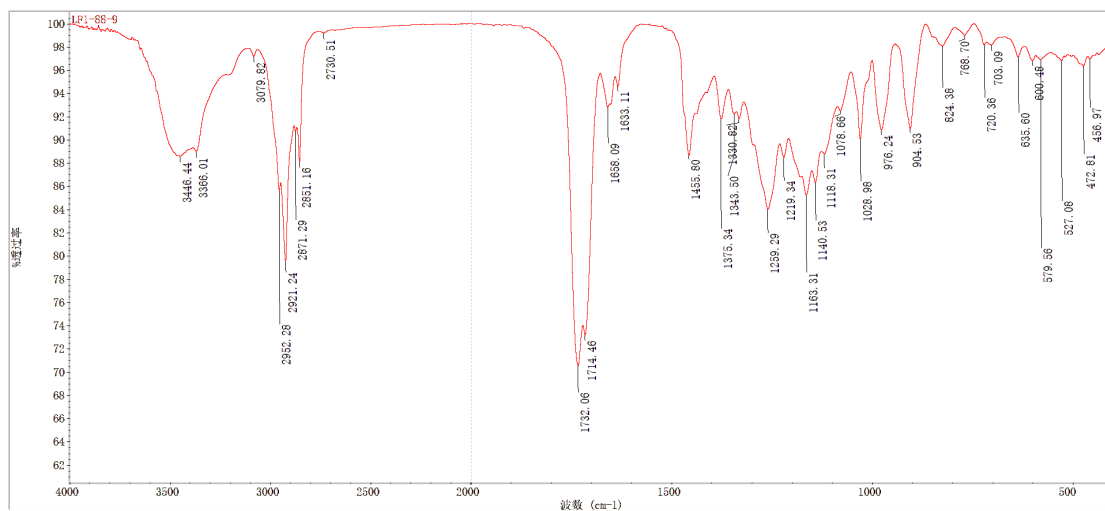

Figure S63. IR spectrum of compound 6.

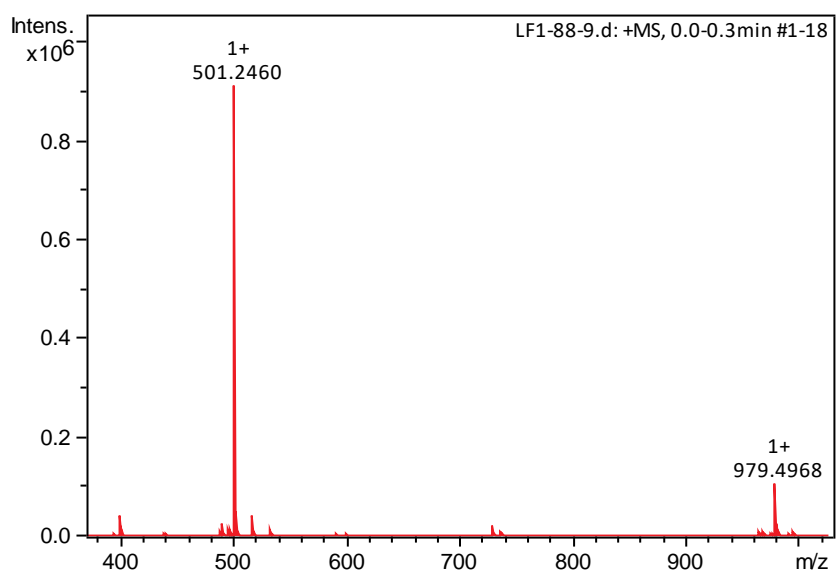

Figure S64. HRESIMS spectrum of compound 6.

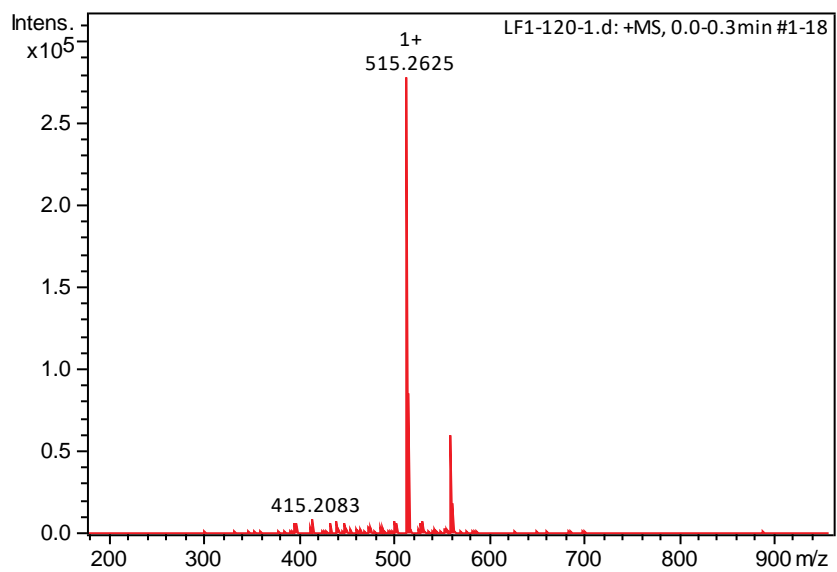

**Figure S65.** HRESIMS spectrum of the reaction product of **3** treated with *o*-phosphoric acid in EtOH.

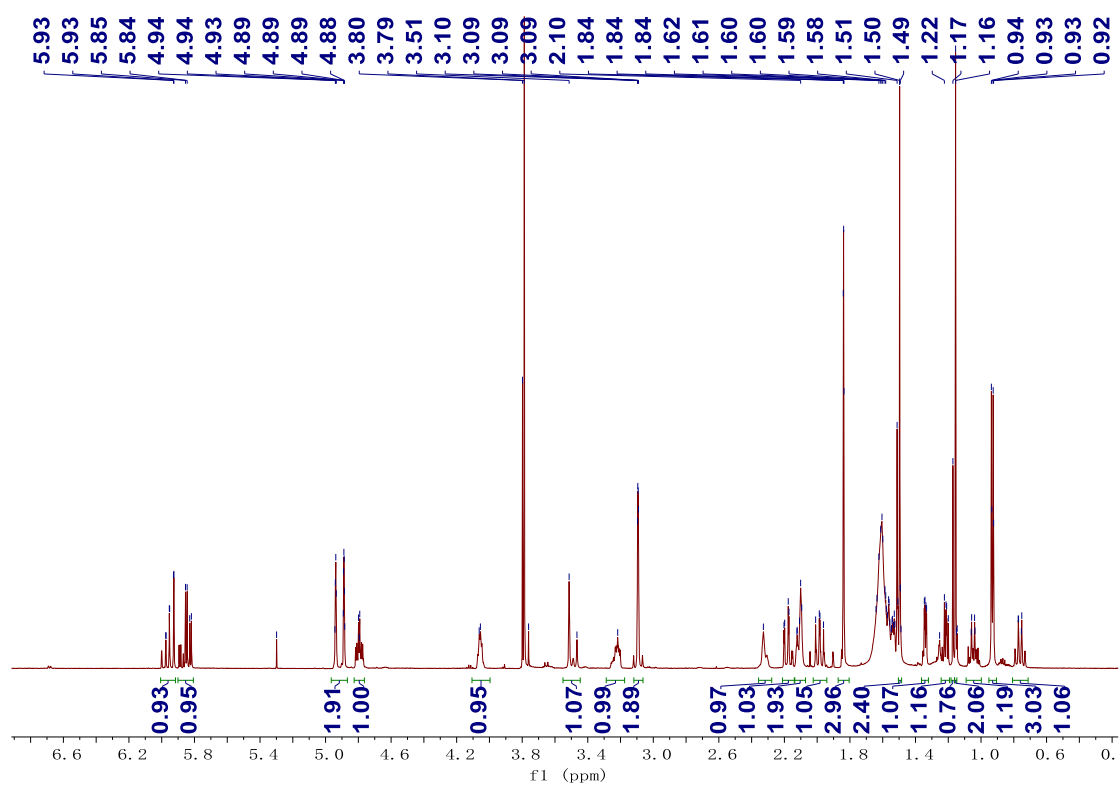

**Figure S66.** <sup>1</sup>H NMR spectrum of *syn*-**1** in CDCl<sub>3</sub>.



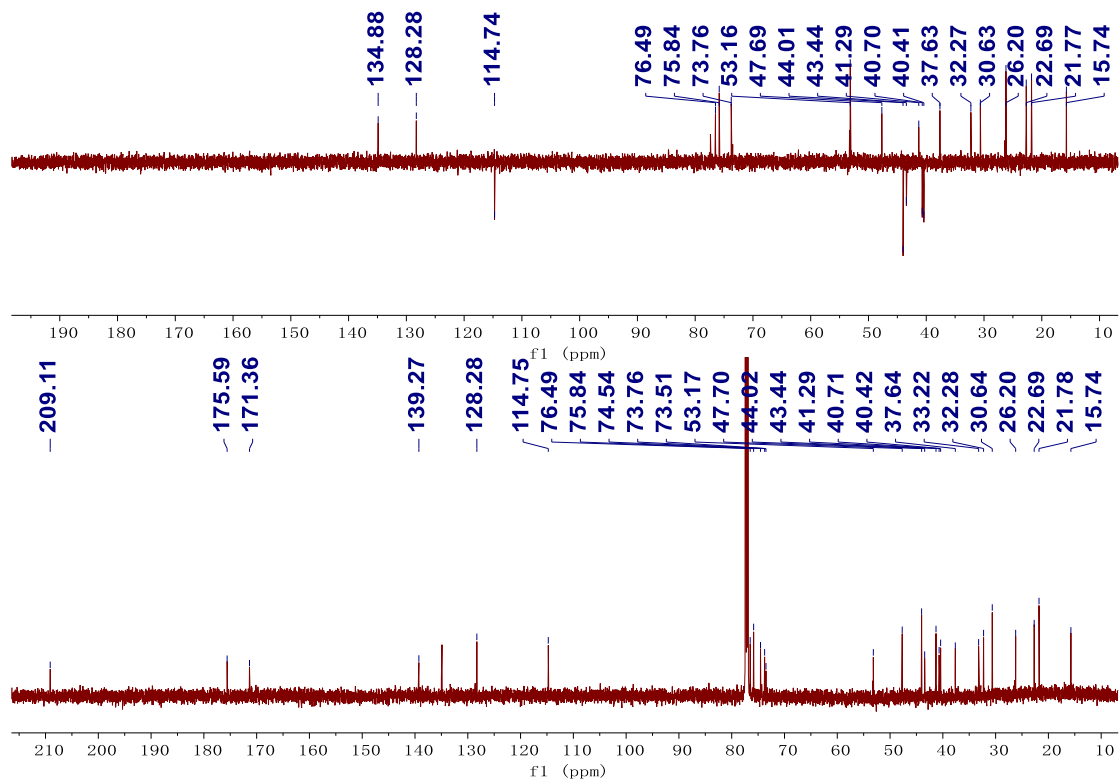

**Figure S67.**  $^{13}\text{C}$  and DEPT NMR spectrum of *syn-1* in  $\text{CDCl}_3$ .

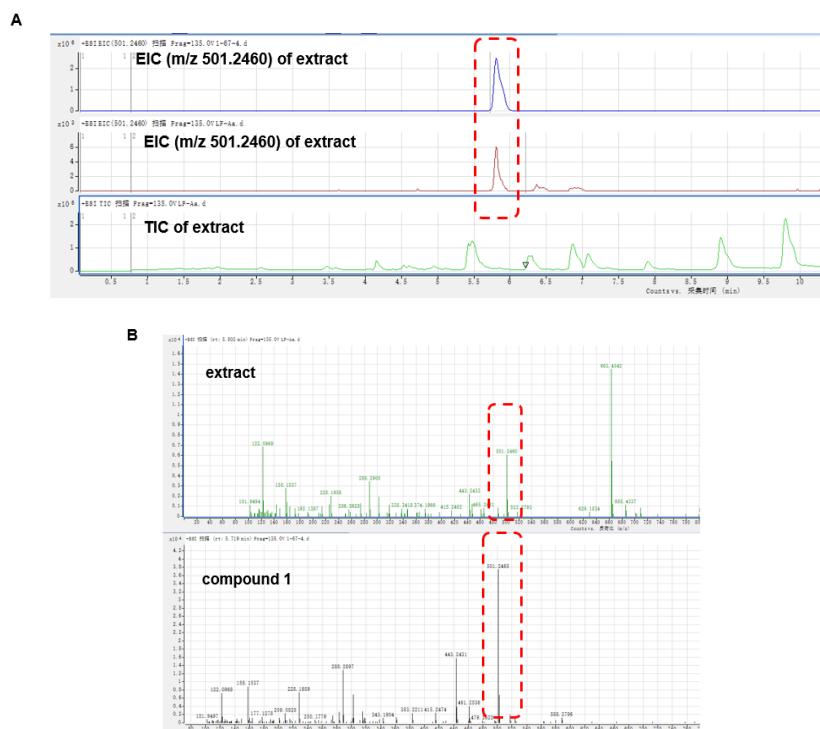

**Figure S68.** (A) The UPLC-MS spectra of compound **1** and an extract of *A. aculeatus*. (B) HRMS spectra of  $m/z$  501.1460 in extract (top) and **1** (bottom).

### Preparation of (*S*)- and (*R*)-MTPA esters of **5**.

The anhydrous CH<sub>2</sub>Cl<sub>2</sub> approximately 2 mL was used to dissolve a sample of compound **5** (0.7 mg). Then, dimethylaminopyridine (30 mg) was added to the transparent solution. Subsequently, triethylamine was taken, followed by (*S*)-MTPA chloride (20 μL) to the solution. After mixing, it was reacted fully at room temperature, and was detected by thin layer analysis (approximately 3 h), and then was quenched by methanol. Solvents were removed to obtain the residue. Finally, the (*R*)-MTPA ester of **5** (0.9 mg, *t<sub>R</sub>* 17.0 min) was obtained from the residue by using RP HPLC (MeCN, 93%). By using the same method, the (*S*)-MTPA ester was also obtained.

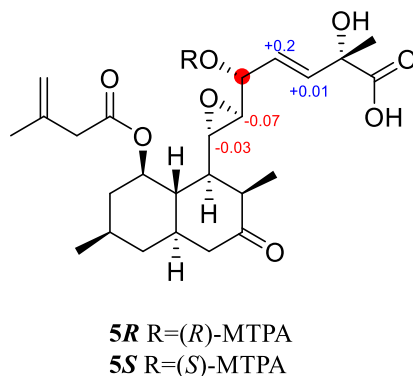

**Figure S69.**  $\Delta\delta_{RS}$  values ( $\delta_R - \delta_S$ , in ppm) for **5R** and **5S**.

### NMR calculation details

#### 1. Methods

In general, conformational analyses were carried out via random searching in the Sybyl-X 2.0 using the MMFF94S force field with an energy cutoff of 5.0 kcal/mol. [1] The results showed twenty-three lowest energy conformers. Subsequently, the conformers were re-optimized at the B3LYP-D3(BJ)/6-31G\* level in PCM DMSO by the GAUSSIAN09 program. [2] All conformers used for property calculations in this work were characterized to be stable point on potential energy surface (PES) with no imaginary frequencies. NMR shielding constants were computed using the GIAO method at the mPW1PW91/6-311+G\*\* level in PCM DMSO by the GAUSSIAN09 program. [2] Gibbs free energies for conformers were determined by using thermal correction at B3LYP-D3(BJ)/6-31G\* level and electronic energies evaluated at the wB97M-V/def2-TZVP level in CPCM DMSO using ORCA [3][4] Boltzmann weights

were computed using relative gibbs free energies. [5] The unscaled chemical shifts( $\delta_u$ ) were computed using TMS (Tetramethylsilane) as a reference standard according to  $\delta_u = \sigma_0 - \sigma_x$ , where  $\sigma_x$  is the Boltzmann averaged shielding tensor (over all significantly populated conformations) and  $\sigma_0$  is the shielding tensor of the TMS computed at the same level of theory employed for  $\sigma_x$ . The scaled chemical shifts( $\delta_s$ ) were calculated as  $\delta_s = (\delta_u - b) / m$ , where m and b are the slope and intercept, respectively, deduced from a linear regression calculation on a plot of  $\delta_u$  against  $\delta_{exp}$ .

[1].Sybyl Software, version X 2.0; Tripos Associates Inc.: St. Louis, MO, 2013.

[2].Gaussian 09, Revision E.01, M. J. Frisch, G. W. Trucks, H. B. Schlegel, G. E. Scuseria, M. A. Robb, J. R. Cheeseman, G. Scalmani, V. Barone, B. Mennucci, G. A. Petersson, H. Nakatsuji, M. Caricato, X. Li, H. P. Hratchian, A. F. Izmaylov, J. Bloino, G. Zheng, J. L. Sonnenberg, M. Hada, M. Ehara, K. Toyota, R. Fukuda, J. Hasegawa, M. Ishida, T. Nakajima, Y. Honda, O. Kitao, H. Nakai, T. Vreven, J. A. Montgomery, Jr., J. E. Peralta, F. Ogliaro, M. Bearpark, J. J. Heyd, E. Brothers, K. N. Kudin, V. N. Staroverov, R. Kobayashi, J. Normand, K. Raghavachari, A. Rendell, J. C. Burant, S. S. Iyengar, J. Tomasi, M. Cossi, N. Rega, J. M. Millam, M. Klene, J. E. Knox, J. B. Cross, V. Bakken, C. Adamo, J. Jaramillo, R. Gomperts, R. E. Stratmann, O. Yazyev, A. J. Austin, R. Cammi, C. Pomelli, J. W. Ochterski, R. L. Martin, K. Morokuma, V. G. Zakrzewski, G. A. Voth, P. Salvador, J. J. Dannenberg, S. Dapprich, A. D. Daniels, J. Farkas, J. B. Foresman, J. V. Ortiz, J. Cioslowski, and D. J. Fox, Gaussian, Inc., Wallingford CT, 2009.

[3]. Neese, F. (2012) The ORCA program system, Wiley Interdiscip. Rev.: Comput. Mol. Sci., 2, 73-78

[4]. Neese, F. (2017) Software update: the ORCA program system, version 4.0, Wiley Interdiscip. Rev.: Comput. Mol. Sci., 8, e1327.

[5]. Nicolás Grimblat, María M. Zanardi, and Ariel M. Sarotti J. Org. Chem. 2015, 80, 12526–12534

## 2. Results

Calculated structures:

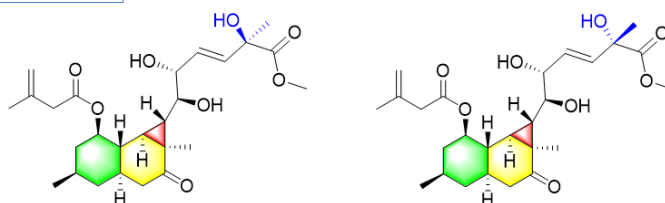

A: 1*R*,3*R*,5*R*,8*S*,9*S*,10*S*,13*S*,14*S*,15*R*,18*R* B: 1*R*,3*R*,5*R*,8*S*,9*S*,10*S*,13*S*,14*S*,15*R*,18*S*

**Figure S70.** Structures (A and B) used for NMR DP4+ calculation.

**Table S2.** Gibbs free energies<sup>a</sup> and equilibrium populations<sup>b</sup> of low-energy conformers of A and B.

| Conformers | $\Delta G$ (a.u.) | P(%) / 100 | G(a.u.)      |
|------------|-------------------|------------|--------------|
| A-1        | 0.00266           | 2.99       | -1614.930704 |
| A-2        | 0.01326           | 0.0        | -1614.920109 |
| A-3        | 0.00557           | 0.14       | -1614.927796 |
| A-4        | 0.00253           | 3.44       | -1614.930838 |
| A-5        | 0.00216           | 5.07       | -1614.931204 |
| A-6        | 0.00514           | 0.22       | -1614.928229 |
| A-7        | 0.00138           | 11.65      | -1614.93199  |
| A-8        | 0.00606           | 0.08       | -1614.927303 |
| A-9        | 0.00474           | 0.33       | -1614.928623 |
| A-10       | 0.00221           | 4.8        | -1614.931153 |
| A-11       | 0.00302           | 2.04       | -1614.930346 |
| A-12       | 0.00105           | 16.52      | -1614.93232  |
| A-13       | 0.00299           | 2.12       | -1614.93038  |
| A-14       | 0.0               | 50.12      | -1614.933367 |
| A-15       | 0.01295           | 0.0        | -1614.920421 |
| A-16       | 0.00457           | 0.4        | -1614.928799 |
| A-17       | 0.00597           | 0.09       | -1614.927397 |
| B-1        | 0.00208           | 5.04       | -1614.928983 |
| B-2        | 0.00233           | 3.85       | -1614.928727 |
| B-3        | 0.00817           | 0.01       | -1614.922888 |
| B-4        | 0.00099           | 15.98      | -1614.930072 |
| B-5        | 0.00293           | 2.04       | -1614.928129 |
| B-6        | 0.00811           | 0.01       | -1614.922949 |
| B-7        | 0.00631           | 0.06       | -1614.924747 |
| B-8        | 0.00203           | 5.3        | -1614.92903  |
| B-9        | 0.00532           | 0.16       | -1614.925744 |
| B-10       | 0.00297           | 1.97       | -1614.928093 |
| B-11       | 0.00485           | 0.27       | -1614.926209 |
| B-12       | 0.00164           | 8.02       | -1614.929421 |
| B-13       | 0.00831           | 0.01       | -1614.922749 |
| B-14       | 0.00644           | 0.05       | -1614.924621 |
| B-15       | 0.00867           | 0.01       | -1614.922387 |
| B-16       | 0.00768           | 0.01       | -1614.923382 |
| B-17       | 0.0               | 45.46      | -1614.931059 |
| B-18       | 0.00947           | 0.0        | -1614.921587 |
| B-19       | 0.00128           | 11.76      | -1614.929782 |

<sup>a</sup>wB97M-V/def2-TZVP, in a.u.

<sup>b</sup>From  $\Delta G$  values at 298.15K.

**Table S3.** Cartesian coordinates for the low-energy reoptimized random research conformers of **A** and **B** at B3LYP-D3(BJ)/6-31G\* level of theory in chloroform.

| <b>A-14</b>   |               | Standard Orientation (A.U.) |           |           |           |
|---------------|---------------|-----------------------------|-----------|-----------|-----------|
| Center number | Atomic number | Atomic Type                 | X         | Y         | Z         |
| 0             | 6             | C                           | 0.473255  | 5.970939  | 0.908457  |
| 1             | 6             | C                           | 2.96975   | 7.39718   | 0.503905  |
| 2             | 6             | C                           | 4.752113  | 5.824773  | -1.161872 |
| 3             | 6             | C                           | 5.141943  | 3.182645  | -0.05572  |
| 4             | 6             | C                           | 2.606649  | 1.76284   | 0.181843  |
| 5             | 6             | C                           | 0.880202  | 3.30152   | 1.918779  |
| 6             | 6             | C                           | 7.056443  | 1.581363  | -1.543513 |
| 7             | 6             | C                           | 7.73055   | -0.739493 | 0.003027  |
| 8             | 6             | C                           | 5.585857  | -2.184909 | 1.132921  |
| 9             | 6             | C                           | 2.96838   | -0.959924 | 1.08133   |
| 10            | 6             | C                           | 3.547658  | -2.995002 | -0.780506 |
| 11            | 8             | O                           | 9.927625  | -1.333716 | 0.418937  |
| 12            | 6             | C                           | 6.30863   | -3.884243 | 3.325228  |
| 13            | 6             | C                           | 2.489261  | 10.021006 | -0.613471 |
| 14            | 8             | O                           | -1.607545 | 2.116489  | 2.053838  |
| 15            | 6             | C                           | -2.241325 | 0.870971  | 4.186754  |
| 16            | 8             | O                           | -0.80888  | 0.552992  | 5.95664   |
| 17            | 6             | C                           | -4.96909  | -0.010146 | 4.061609  |
| 18            | 6             | C                           | -5.460209 | -2.490049 | 5.404964  |
| 19            | 6             | C                           | -6.14041  | -4.5286   | 4.074934  |
| 20            | 6             | C                           | -5.231571 | -2.508708 | 8.240604  |
| 21            | 6             | C                           | 2.400742  | -5.602356 | -0.655185 |
| 22            | 6             | C                           | 0.329067  | -5.962615 | -2.6729   |
| 23            | 8             | O                           | 1.412223  | -5.662908 | -5.110666 |
| 24            | 6             | C                           | -1.889753 | -4.235453 | -2.340758 |
| 25            | 6             | C                           | -2.554556 | -2.46349  | -3.997872 |
| 26            | 6             | C                           | -4.967943 | -0.953747 | -3.849983 |
| 27            | 6             | C                           | -4.408873 | 1.839919  | -3.259838 |
| 28            | 6             | C                           | -6.318571 | -1.01133  | -6.437269 |
| 29            | 8             | O                           | -6.559995 | -2.026251 | -1.961747 |
| 30            | 8             | O                           | -2.602312 | 3.016054  | -4.036039 |
| 31            | 8             | O                           | -6.318745 | 2.845601  | -1.913694 |
| 32            | 8             | O                           | 4.235872  | -7.507392 | -1.276221 |
| 33            | 6             | C                           | -6.15514  | 5.488054  | -1.276032 |
| 34            | 1             | H                           | 1.807442  | -1.528142 | 2.674599  |
| 35            | 1             | H                           | 5.90498   | 3.415914  | 1.867384  |
| 36            | 1             | H                           | 1.70315   | 1.722793  | -1.686133 |
| 37            | 1             | H                           | 3.865372  | -2.381435 | -2.714108 |
| 38            | 1             | H                           | -0.743448 | 7.017925  | 2.220576  |
| 39            | 1             | H                           | -0.528139 | 5.829081  | -0.898253 |
| 40            | 1             | H                           | 3.888935  | 7.634405  | 2.354518  |
| 41            | 1             | H                           | 3.956852  | 5.665064  | -3.075567 |
| 42            | 1             | H                           | 6.57911   | 6.78817   | -1.345959 |
| 43            | 1             | H                           | 1.655134  | 3.334229  | 3.832487  |
| 44            | 1             | H                           | 6.248765  | 1.04475   | -3.378923 |
| 45            | 1             | H                           | 8.802184  | 2.625427  | -1.909162 |
| 46            | 1             | H                           | 4.686169  | -4.948614 | 4.031659  |
| 47            | 1             | H                           | 7.802362  | -5.214433 | 2.79479   |

|    |   |   |           |           |           |
|----|---|---|-----------|-----------|-----------|
| 48 | 1 | H | 7.045525  | -2.744181 | 4.886805  |
| 49 | 1 | H | 1.259228  | 11.146298 | 0.616098  |
| 50 | 1 | H | 1.57023   | 9.870593  | -2.465837 |
| 51 | 1 | H | 4.26329   | 11.059263 | -0.866704 |
| 52 | 1 | H | -6.096283 | 1.507268  | 4.932316  |
| 53 | 1 | H | -5.522213 | -0.128509 | 2.081671  |
| 54 | 1 | H | -6.537377 | -6.318706 | 5.002619  |
| 55 | 1 | H | -6.346963 | -4.461558 | 2.034105  |
| 56 | 1 | H | -3.31772  | -1.985257 | 8.822538  |
| 57 | 1 | H | -6.516171 | -1.112251 | 9.084853  |
| 58 | 1 | H | -5.691286 | -4.367369 | 9.020766  |
| 59 | 1 | H | 1.594829  | -5.96905  | 1.22178   |
| 60 | 1 | H | -0.350809 | -7.922048 | -2.444389 |
| 61 | 1 | H | 2.993385  | -6.602646 | -5.023533 |
| 62 | 1 | H | -3.034749 | -4.577317 | -0.672145 |
| 63 | 1 | H | -1.39945  | -2.127076 | -5.657216 |
| 64 | 1 | H | -5.118499 | -0.207173 | -7.916496 |
| 65 | 1 | H | -8.081278 | 0.070258  | -6.351598 |
| 66 | 1 | H | -6.756121 | -2.973596 | -6.913652 |
| 67 | 1 | H | -7.859305 | -0.783524 | -1.591573 |
| 68 | 1 | H | 5.841867  | -6.994508 | -0.55969  |
| 69 | 1 | H | -4.884676 | 5.714269  | 0.329912  |
| 70 | 1 | H | -5.459458 | 6.569544  | -2.887613 |
| 71 | 1 | H | -8.069172 | 6.05836   | -0.775916 |

| <b>B-17</b>   |               | Standard Orientation (A.U.) |           |           |           |
|---------------|---------------|-----------------------------|-----------|-----------|-----------|
| Center number | Atomic number | Atomic Type                 | X         | Y         | Z         |
| 0             | 6             | C                           | 6.097137  | 3.485001  | 1.432664  |
| 1             | 6             | C                           | 8.501863  | 2.279305  | 2.532031  |
| 2             | 6             | C                           | 9.090783  | -0.209387 | 1.157816  |
| 3             | 6             | C                           | 6.863491  | -2.052473 | 1.271772  |
| 4             | 6             | C                           | 4.439694  | -0.831015 | 0.243465  |
| 5             | 6             | C                           | 3.853002  | 1.67755   | 1.526492  |
| 6             | 6             | C                           | 7.351369  | -4.492191 | -0.237217 |
| 7             | 6             | C                           | 5.27089   | -6.436109 | 0.168386  |
| 8             | 6             | C                           | 2.60292   | -5.503882 | 0.31806   |
| 9             | 6             | C                           | 2.202168  | -2.648364 | 0.365144  |
| 10            | 6             | C                           | 1.548353  | -4.074136 | -1.980945 |
| 11            | 8             | O                           | 5.767331  | -8.669413 | 0.504196  |
| 12            | 6             | C                           | 0.860814  | -7.187127 | 1.849734  |
| 13            | 6             | C                           | 10.729207 | 4.120266  | 2.409779  |
| 14            | 8             | O                           | 1.741449  | 2.739519  | 0.098903  |
| 15            | 6             | C                           | 0.38236   | 4.618965  | 1.195594  |
| 16            | 8             | O                           | 0.693263  | 5.299098  | 3.361065  |
| 17            | 6             | C                           | -1.442957 | 5.774638  | -0.686279 |
| 18            | 6             | C                           | -0.031409 | 7.246489  | -2.702764 |
| 19            | 6             | C                           | 0.068006  | 6.415136  | -5.084287 |
| 20            | 6             | C                           | 1.246599  | 9.634589  | -1.830015 |
| 21            | 6             | C                           | -1.114821 | -4.397381 | -2.975984 |
| 22            | 6             | C                           | -2.285395 | -1.8217   | -3.738918 |
| 23            | 8             | O                           | -0.456752 | -0.140616 | -4.822243 |
| 24            | 6             | C                           | -3.585198 | -0.584186 | -1.540699 |
| 25            | 6             | C                           | -6.042278 | -0.06686  | -1.395122 |
| 26            | 6             | C                           | -7.201761 | 1.286452  | 0.861753  |
| 27            | 6             | C                           | -8.762836 | -0.664165 | 2.341376  |

|    |   |   |            |           |           |
|----|---|---|------------|-----------|-----------|
| 28 | 6 | C | -8.865546  | 3.498733  | -0.010163 |
| 29 | 8 | O | -5.31195   | 2.222087  | 2.513787  |
| 30 | 8 | O | -8.187741  | -1.346277 | 4.463238  |
| 31 | 8 | O | -10.733095 | -1.534917 | 1.038225  |
| 32 | 8 | O | -1.102221  | -5.93693  | -5.194022 |
| 33 | 6 | C | -12.242041 | -3.440681 | 2.281141  |
| 34 | 1 | H | 0.655724   | -2.066402 | 1.583473  |
| 35 | 1 | H | 6.543001   | -2.567159 | 3.261185  |
| 36 | 1 | H | 4.810568   | -0.371469 | -1.749913 |
| 37 | 1 | H | 2.868995   | -3.782285 | -3.527661 |
| 38 | 1 | H | 5.627043   | 5.219193  | 2.456107  |
| 39 | 1 | H | 6.428886   | 4.002408  | -0.550666 |
| 40 | 1 | H | 8.138017   | 1.831024  | 4.53029   |
| 41 | 1 | H | 9.540829   | 0.200583  | -0.830845 |
| 42 | 1 | H | 10.775955  | -1.094769 | 1.97956   |
| 43 | 1 | H | 3.22207    | 1.394236  | 3.475142  |
| 44 | 1 | H | 7.47854    | -4.019924 | -2.257896 |
| 45 | 1 | H | 9.139587   | -5.382979 | 0.294262  |
| 46 | 1 | H | 0.579262   | -9.013066 | 0.920278  |
| 47 | 1 | H | 1.680809   | -7.55388  | 3.713015  |
| 48 | 1 | H | -0.98443   | -6.302692 | 2.132715  |
| 49 | 1 | H | 10.309665  | 5.870952  | 3.433324  |
| 50 | 1 | H | 11.159736  | 4.62118   | 0.444377  |
| 51 | 1 | H | 12.432484  | 3.284121  | 3.239376  |
| 52 | 1 | H | -2.554451  | 4.266675  | -1.547793 |
| 53 | 1 | H | -2.715468  | 6.999145  | 0.38715   |
| 54 | 1 | H | 1.085177   | 7.457438  | -6.533902 |
| 55 | 1 | H | -0.826464  | 4.656355  | -5.6524   |
| 56 | 1 | H | -0.132024  | 10.962375 | -1.028822 |
| 57 | 1 | H | 2.619896   | 9.24071   | -0.32478  |
| 58 | 1 | H | 2.238692   | 10.5764   | -3.379201 |
| 59 | 1 | H | -2.352573  | -5.24313  | -1.54065  |
| 60 | 1 | H | -3.646442  | -2.21663  | -5.245184 |
| 61 | 1 | H | 0.420872   | 0.697146  | -3.437332 |
| 62 | 1 | H | -2.391567  | -0.008062 | 0.023782  |
| 63 | 1 | H | -7.341934  | -0.588937 | -2.900272 |
| 64 | 1 | H | -10.329768 | 2.860066  | -1.318573 |
| 65 | 1 | H | -7.674068  | 4.891739  | -0.964635 |
| 66 | 1 | H | -9.759927  | 4.400014  | 1.621551  |
| 67 | 1 | H | -5.392332  | 1.169219  | 4.027658  |
| 68 | 1 | H | -0.288765  | -7.520401 | -4.750533 |
| 69 | 1 | H | -11.081237 | -5.090745 | 2.714575  |
| 70 | 1 | H | -13.048022 | -2.68162  | 4.022329  |
| 71 | 1 | H | -13.725094 | -3.92204  | 0.938833  |

**Table S4.** MAE $_{\Delta\Delta\delta}$  analysis based on the calculated NMR chemical shifts of **A** and **B** as well as the experimental NMR chemical shifts of **1** and **2**.

| NO. | $\delta_{\text{exp-1}}$ | $\delta_{\text{calc-A}}$ | $\delta_{\text{calc-B}}$ | $\delta_{\text{exp-2}}$ | $\Delta\delta_{\text{exp(1-2)}}$ | $\Delta\delta_{\text{calc(A-B)}}$ | $\Delta\Delta\delta_{\text{calc\_A-B/exp 1-2}}$ | $\Delta\Delta\delta_{\text{calc\_A-B/exp 2-1}}$ |
|-----|-------------------------|--------------------------|--------------------------|-------------------------|----------------------------------|-----------------------------------|-------------------------------------------------|-------------------------------------------------|
| 1   | 76.5                    | 74.82                    | 77.62                    | 76.5                    | 0                                | -2.81                             | 2.80517                                         | 2.80517                                         |
| 2   | 40.4                    | 38.96                    | 36.80                    | 40.5                    | -0.1                             | 2.16                              | 2.256589                                        | 2.056589                                        |
| 3   | 30.7                    | 32.12                    | 31.32                    | 30.7                    | 0                                | 0.80                              | 0.798494                                        | 0.798494                                        |

|                          |       |        |        |       |      |       |               |          |
|--------------------------|-------|--------|--------|-------|------|-------|---------------|----------|
| 4                        | 40.7  | 39.45  | 39.14  | 40.7  | 0    | 0.31  | 0.310091      | 0.310091 |
| 5                        | 41.3  | 42.59  | 41.52  | 41.4  | -0.1 | 1.07  | 1.173763      | 0.973763 |
| 6                        | 43.5  | 43.25  | 44.01  | 43.4  | 0.1  | -0.77 | 0.868726      | 0.668726 |
| 7                        | 209.1 | 208.72 | 208.13 | 209.1 | 0    | 0.59  | 0.590684      | 0.590684 |
| 8                        | 33.2  | 35.64  | 35.18  | 33.2  | 0    | 0.46  | 0.460659      | 0.460659 |
| 9                        | 32.3  | 36.11  | 34.26  | 32.3  | 0    | 1.86  | 1.8553        | 1.8553   |
| 10                       | 47.7  | 45.48  | 46.35  | 47.7  | 0    | -0.87 | 0.868336      | 0.868336 |
| 11                       | 21.8  | 20.66  | 20.35  | 21.8  | 0    | 0.31  | 0.309207      | 0.309207 |
| 12                       | 15.7  | 14.36  | 15.29  | 15.7  | 0    | -0.93 | 0.927909      | 0.927909 |
| 13                       | 37.7  | 40.34  | 42.01  | 37.7  | 0    | -1.67 | 1.673333      | 1.673333 |
| 14                       | 73.7  | 73.11  | 72.02  | 73.5  | 0.2  | 1.09  | 0.891468      | 1.291468 |
| 15                       | 75.8  | 72.34  | 75.96  | 75.9  | -0.1 | -3.62 | 3.523341      | 3.723341 |
| 16                       | 128.4 | 130.16 | 131.69 | 128.7 | -0.3 | -1.52 | 1.221621      | 1.821621 |
| 17                       | 134.8 | 132.91 | 132.19 | 135   | -0.2 | 0.72  | 0.923771      | 0.523771 |
| 18                       | 74.6  | 75.04  | 74.01  | 74.3  | 0.3  | 1.04  | 0.737604      | 1.337604 |
| 19                       | 175.6 | 174.15 | 174.62 | 175.6 | 0    | -0.48 | 0.478526      | 0.478526 |
| 20                       | 26.2  | 26.74  | 24.48  | 26.4  | -0.2 | 2.25  | 2.452322      | 2.052322 |
| 21                       | 53.1  | 51.91  | 51.77  | 53.3  | -0.2 | 0.14  | 0.338601      | 0.061399 |
| 1'                       | 171.4 | 171.70 | 170.34 | 171.4 | 0    | 1.36  | 1.362201      | 1.362201 |
| 2'                       | 44    | 42.95  | 46.26  | 44    | 0    | -3.31 | 3.310957      | 3.310957 |
| 3'                       | 139.2 | 143.52 | 142.16 | 139.2 | 0    | 1.37  | 1.367188      | 1.367188 |
| 4'                       | 114.7 | 114.41 | 115.09 | 114.8 | -0.1 | -0.68 | 0.582764      | 0.782764 |
| 5'                       | 22.7  | 23.29  | 22.17  | 22.7  | 0    | 1.12  | 1.120631      | 1.120631 |
| <b>MAE<sub>ΔΔδ</sub></b> |       |        |        |       |      |       | <b>1.2772</b> | 1.2897   |

Calculated structures:

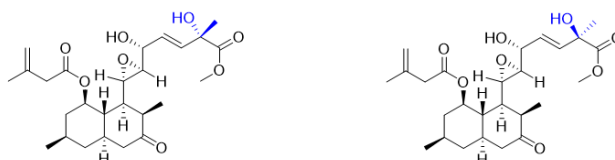

**C:** 1*R*,3*R*,5*R*,8*R*,9*R*,10*S*,13*S*,14*S*,15*R*,18*S* **D:** 1*R*,3*R*,5*R*,8*R*,9*R*,10*S*,13*S*,14*S*,15*R*,18*R*

**Figure S71.** Structures (**C** and **D**) used for NMR DP4+ calculation.

**Table S5.** Gibbs free energies<sup>a</sup> and equilibrium populations<sup>b</sup> of low-energy conformers of **C** and **D**.

| Conformers | $\Delta G$ (a.u.) | P(%) / 100 | G(a.u.)      |
|------------|-------------------|------------|--------------|
| <b>C-1</b> | 0.00438           | 0.95       | -1614.920462 |
| <b>C-2</b> | 0.00444           | 0.89       | -1614.920405 |
| <b>C-3</b> | 0.01402           | 0.0        | -1614.910818 |
| <b>C-4</b> | 0.00842           | 0.01       | -1614.916424 |
| <b>C-5</b> | 0.0               | 98.05      | -1614.924841 |
| <b>C-6</b> | 0.00727           | 0.04       | -1614.91757  |
| <b>C-7</b> | 0.00714           | 0.05       | -1614.917701 |
| <b>D-1</b> | 0.00263           | 5.52       | -1614.917885 |
| <b>D-2</b> | 0.00374           | 1.71       | -1614.916778 |
| <b>D-3</b> | 0.00649           | 0.09       | -1614.914023 |
| <b>D-4</b> | 0.0               | 89.45      | -1614.920514 |
| <b>D-5</b> | 0.00373           | 1.72       | -1614.916784 |



|            |         |     |              |
|------------|---------|-----|--------------|
| <b>D-6</b> | 0.00386 | 1.5 | -1614.916657 |
|------------|---------|-----|--------------|

<sup>a</sup>wB97M-V/def2-TZVP, in a.u.

<sup>b</sup>From  $\Delta G$  values at 298.15K.

**Table S6.** Cartesian coordinates for the low-energy reoptimized random research conformers of **C** and **D** at B3LYP-D3(BJ)/6-31G\* level of theory in chloroform.

| <b>C-5</b>    |               | Standard Orientation (A.U.) |           |           |           |
|---------------|---------------|-----------------------------|-----------|-----------|-----------|
| Center number | Atomic number | Atomic Type                 | X         | Y         | Z         |
| 0             | 6             | C                           | 0.566163  | 9.979494  | 17.794446 |
| 1             | 1             | H                           | 0.820851  | 7.922228  | 18.012245 |
| 2             | 1             | H                           | 0.909992  | 10.86253  | 19.64289  |
| 3             | 1             | H                           | 2.034076  | 10.608484 | 16.46195  |
| 4             | 6             | C                           | -2.026406 | 10.59609  | 16.804845 |
| 5             | 6             | C                           | -2.679639 | 9.541778  | 14.236466 |
| 6             | 1             | H                           | -2.490528 | 7.46813   | 14.183538 |
| 7             | 1             | H                           | -4.665811 | 9.949602  | 13.755189 |
| 8             | 6             | C                           | -1.078194 | 10.616757 | 12.112071 |
| 9             | 6             | C                           | 0.238637  | 9.871757  | 7.865297  |
| 10            | 1             | H                           | 1.869426  | 10.983416 | 8.523147  |
| 11            | 6             | C                           | -1.453898 | 11.52415  | 6.216163  |
| 12            | 1             | H                           | -1.965164 | 13.226378 | 7.297434  |
| 13            | 1             | H                           | -3.219695 | 10.476207 | 5.840045  |
| 14            | 6             | C                           | -0.2149   | 12.246129 | 3.706201  |
| 15            | 1             | H                           | 1.496728  | 13.367723 | 4.133063  |
| 16            | 6             | C                           | 0.630856  | 9.841793  | 2.339152  |
| 17            | 1             | H                           | 1.599035  | 10.326349 | 0.55839   |
| 18            | 1             | H                           | -1.054866 | 8.72521   | 1.807269  |
| 19            | 6             | C                           | 2.375015  | 8.204457  | 3.963557  |
| 20            | 1             | H                           | 4.073907  | 9.341338  | 4.405482  |
| 21            | 6             | C                           | 1.159965  | 7.477178  | 6.518455  |
| 22            | 1             | H                           | -0.529792 | 6.312123  | 6.130157  |
| 23            | 6             | C                           | 3.054578  | 5.908004  | 8.098298  |
| 24            | 1             | H                           | 4.733018  | 7.108218  | 8.407417  |
| 25            | 6             | C                           | 3.958487  | 3.504366  | 6.674413  |
| 26            | 1             | H                           | 5.579964  | 2.705374  | 7.702387  |
| 27            | 6             | C                           | 4.966954  | 4.184789  | 4.065144  |
| 28            | 6             | C                           | 3.255112  | 5.856323  | 2.498269  |
| 29            | 1             | H                           | 1.576862  | 4.739535  | 1.950563  |
| 30            | 1             | H                           | 4.259149  | 6.377263  | 0.75603   |
| 31            | 6             | C                           | -1.968752 | 13.861999 | 2.077972  |
| 32            | 1             | H                           | -3.706416 | 12.814661 | 1.598951  |
| 33            | 1             | H                           | -1.049983 | 14.412192 | 0.292842  |
| 34            | 1             | H                           | -2.533525 | 15.601425 | 3.071799  |
| 35            | 6             | C                           | 1.930501  | 1.431184  | 6.447997  |
| 36            | 1             | H                           | 1.408768  | 0.695898  | 8.320908  |
| 37            | 1             | H                           | 0.194184  | 2.116717  | 5.531995  |
| 38            | 1             | H                           | 2.65662   | -0.163883 | 5.327896  |
| 39            | 6             | C                           | 2.122051  | 5.15417   | 10.69431  |
| 40            | 1             | H                           | 0.215127  | 4.36023   | 10.787897 |
| 41            | 6             | C                           | 3.894126  | 4.39301   | 12.684679 |
| 42            | 1             | H                           | 5.931807  | 4.455212  | 12.291287 |
| 43            | 6             | C                           | 3.0971    | 2.595572  | 14.795453 |
| 44            | 1             | H                           | 3.409192  | 0.645138  | 14.107844 |

| 45            | 6             | C                           | 4.708081  | 3.018275  | 17.111496 |
|---------------|---------------|-----------------------------|-----------|-----------|-----------|
| 46            | 1             | H                           | 6.761087  | 2.9866    | 16.858025 |
| 47            | 6             | C                           | 3.77855   | 3.464739  | 19.40896  |
| 48            | 1             | H                           | 1.736993  | 3.477838  | 19.720375 |
| 49            | 6             | C                           | 5.420803  | 3.976454  | 21.707345 |
| 50            | 6             | C                           | 4.790767  | 6.580492  | 22.832287 |
| 51            | 1             | H                           | 5.316967  | 8.036922  | 21.448011 |
| 52            | 1             | H                           | 5.892747  | 6.888073  | 24.568726 |
| 53            | 1             | H                           | 2.766972  | 6.751035  | 23.261451 |
| 54            | 6             | C                           | 4.882157  | 1.885485  | 23.648968 |
| 55            | 6             | C                           | 1.835993  | -0.063023 | 26.226793 |
| 56            | 1             | H                           | 2.99418   | 0.084729  | 27.946216 |
| 57            | 1             | H                           | 2.129448  | -1.940299 | 25.384532 |
| 58            | 1             | H                           | -0.165935 | 0.226994  | 26.672279 |
| 59            | 6             | CC                          | -3.695419 | 11.977283 | 18.109438 |
| 60            | 1             | H                           | -3.235948 | 12.737749 | 19.975229 |
| 61            | 1             | H                           | -5.570322 | 12.408077 | 17.353589 |
| 62            | 8             | O                           | 0.089281  | 12.569122 | 12.194392 |
| 63            | 8             | O                           | -1.193631 | 9.116166  | 10.053166 |
| 64            | 8             | O                           | 6.990733  | 3.427155  | 3.312088  |
| 65            | 8             | O                           | 2.692097  | 6.806451  | 12.766036 |
| 66            | 8             | O                           | 0.488375  | 2.821725  | 15.271579 |
| 67            | 1             | H                           | 0.175237  | 4.614436  | 15.495556 |
| 68            | 8             | O                           | 8.007783  | 3.879448  | 21.117325 |
| 69            | 1             | H                           | 8.662502  | 2.381763  | 21.959903 |
| 70            | 8             | O                           | 6.480693  | 0.397038  | 24.327241 |
| 71            | 8             | O                           | 2.501298  | 1.877407  | 24.465499 |
| <b>D-4</b>    |               | Standard Orientation (A.U.) |           |           |           |
| Center number | Atomic number | Atomic Type                 | X         | Y         | Z         |
| 0             | 6             | C                           | 3.897449  | 0.894977  | 7.293954  |
| 1             | 1             | H                           | 3.157884  | 0.021828  | 9.029372  |
| 2             | 1             | H                           | 5.141206  | -0.495095 | 6.37405   |
| 3             | 1             | H                           | 2.284983  | 1.246387  | 6.028868  |
| 4             | 6             | C                           | 5.379603  | 3.322615  | 7.903885  |
| 5             | 1             | H                           | 6.871373  | 2.837147  | 9.268837  |
| 6             | 6             | C                           | 6.765466  | 4.245327  | 5.554063  |
| 7             | 6             | C                           | 5.140851  | 5.611667  | 3.637212  |
| 8             | 1             | H                           | 3.859648  | 4.215183  | 2.758636  |
| 9             | 1             | H                           | 6.375813  | 6.359258  | 2.143615  |
| 10            | 6             | C                           | 3.538171  | 7.708311  | 4.848917  |
| 11            | 1             | H                           | 4.853895  | 9.126764  | 5.644341  |
| 12            | 6             | C                           | 1.956473  | 6.675932  | 7.076193  |
| 13            | 1             | H                           | 0.664812  | 5.211145  | 6.334507  |
| 14            | 6             | C                           | 3.735178  | 5.464334  | 9.054092  |
| 15            | 1             | H                           | 5.03665   | 6.962434  | 9.698797  |
| 16            | 6             | C                           | 2.425714  | 4.487221  | 11.399023 |
| 17            | 1             | H                           | 0.722076  | 3.355744  | 11.09677  |
| 18            | 6             | C                           | 3.832724  | 4.022632  | 13.740882 |
| 19            | 1             | H                           | 5.860239  | 4.457037  | 13.807554 |
| 20            | 6             | C                           | 2.919514  | 2.073396  | 15.659562 |
| 21            | 1             | H                           | 3.5985    | 0.19635   | 15.055034 |
| 22            | 6             | C                           | 3.929407  | 2.648623  | 18.257845 |
| 23            | 1             | H                           | 3.255467  | 4.392554  | 19.148003 |
| 24            | 6             | C                           | 5.582409  | 1.196381  | 19.48655  |

|    |   |   |           |           |           |
|----|---|---|-----------|-----------|-----------|
| 25 | 1 | H | 6.295579  | -0.550548 | 18.631478 |
| 26 | 6 | C | 6.618091  | 1.804849  | 22.102229 |
| 27 | 6 | C | 9.445092  | 2.400429  | 21.959292 |
| 28 | 1 | H | 10.179143 | 2.789885  | 23.864364 |
| 29 | 1 | H | 9.71647   | 4.085509  | 20.776606 |
| 30 | 1 | H | 10.48889  | 0.802962  | 21.146143 |
| 31 | 6 | C | 6.217327  | -0.616856 | 23.670539 |
| 32 | 6 | C | 3.474271  | -2.637351 | 26.545265 |
| 33 | 1 | H | 1.744764  | -2.157731 | 27.579912 |
| 34 | 1 | H | 5.000478  | -3.130319 | 27.867012 |
| 35 | 1 | H | 3.143435  | -4.254079 | 25.281373 |
| 36 | 6 | C | 1.915018  | 9.046921  | 2.866937  |
| 37 | 1 | H | 0.629669  | 7.655607  | 1.981941  |
| 38 | 1 | H | 3.140521  | 9.767974  | 1.343285  |
| 39 | 6 | C | 0.350224  | 11.198368 | 4.000232  |
| 40 | 1 | H | 1.681835  | 12.596004 | 4.802637  |
| 41 | 6 | C | -1.263723 | 10.159735 | 6.162757  |
| 42 | 1 | H | -2.319822 | 11.693144 | 7.091582  |
| 43 | 1 | H | -2.669052 | 8.820555  | 5.394901  |
| 44 | 6 | C | 0.286373  | 8.77954   | 8.165734  |
| 45 | 1 | H | 1.455198  | 10.147249 | 9.210399  |
| 46 | 6 | C | -2.160449 | 9.010198  | 11.955927 |
| 47 | 6 | C | -4.026742 | 7.535157  | 13.565631 |
| 48 | 1 | H | -5.860499 | 7.630554  | 12.580345 |
| 49 | 1 | H | -3.466234 | 5.528725  | 13.538215 |
| 50 | 6 | C | -4.261545 | 8.530527  | 16.227864 |
| 51 | 6 | C | -1.999183 | 8.149926  | 17.909337 |
| 52 | 1 | H | -2.241245 | 9.094069  | 19.743393 |
| 53 | 1 | H | -0.271221 | 8.872475  | 17.003709 |
| 54 | 1 | H | -1.69274  | 6.117979  | 18.283144 |
| 55 | 6 | C | -1.26498  | 12.531293 | 2.012043  |
| 56 | 1 | H | -0.089267 | 13.307848 | 0.479717  |
| 57 | 1 | H | -2.3491   | 14.099987 | 2.846286  |
| 58 | 1 | H | -2.626921 | 11.205463 | 1.155922  |
| 59 | 8 | O | 9.005785  | 3.890098  | 5.252436  |
| 60 | 8 | O | 2.220572  | 6.18044   | 13.508216 |
| 61 | 8 | O | 0.245415  | 1.987713  | 15.654056 |
| 62 | 1 | H | -0.296465 | 3.739559  | 15.595515 |
| 63 | 8 | O | 5.406789  | 3.900298  | 23.207606 |
| 64 | 1 | H | 3.790751  | 3.323239  | 23.841553 |
| 65 | 8 | O | 4.134152  | -0.441275 | 25.116145 |
| 66 | 8 | O | 7.517263  | -2.480124 | 23.542672 |
| 67 | 8 | O | -1.44836  | 7.636806  | 9.927983  |
| 68 | 8 | O | -1.45492  | 11.1349   | 12.361998 |
| 69 | 6 | C | -6.379603 | 9.661703  | 17.018813 |
| 70 | 1 | H | -6.556096 | 10.390294 | 18.944475 |
| 71 | 1 | H | -8.004289 | 9.911692  | 15.76609  |

**Table S7.** MAE $_{\Delta\Delta\delta}$  analysis based on the calculated NMR chemical shifts of **C** and **D** as well as the experimental NMR chemical shifts of **5** and **6**.

| NO.                                          | $\delta_{\text{exp-5}}$ | $\delta_{\text{calc-C}}$ | $\delta_{\text{calc-D}}$ | $\delta_{\text{exp-6}}$ | $\Delta\delta_{\text{exp(5-6)}}$ | $\Delta\delta_{\text{calc(C-D)}}$ | $\Delta\Delta\delta_{\text{calc\_C-D/exp 5-6}}$ | $\Delta\Delta\delta_{\text{calc\_C-D/exp 6-5}}$ |
|----------------------------------------------|-------------------------|--------------------------|--------------------------|-------------------------|----------------------------------|-----------------------------------|-------------------------------------------------|-------------------------------------------------|
| 1                                            | 75.08                   | 77.1993                  | 77.1334                  | 75.07                   | 0.01                             | 0.0659                            | 0.0559                                          | 0.0759                                          |
| 2                                            | 40.76                   | 43.43872                 | 43.04618                 | 40.74                   | 0.02                             | 0.392541                          | 0.372541                                        | 0.412541                                        |
| 3                                            | 30.18                   | 34.09979                 | 34.02893                 | 30.17                   | 0.01                             | 0.070858                          | 0.060858                                        | 0.080858                                        |
| 4                                            | 41.29                   | 44.75652                 | 44.96464                 | 41.28                   | 0.01                             | -0.20812                          | 0.21812                                         | 0.19812                                         |
| 5                                            | 38.28                   | 45.06449                 | 44.881                   | 38.3                    | -0.02                            | 0.183491                          | 0.203491                                        | 0.163491                                        |
| 6                                            | 44.42                   | 48.93513                 | 49.12157                 | 44.42                   | 0                                | -0.18644                          | 0.186442                                        | 0.186442                                        |
| 7                                            | 212.08                  | 222.3643                 | 222.4453                 | 212.09                  | -0.01                            | -0.08099                          | 0.070985                                        | 0.090985                                        |
| 8                                            | 45.92                   | 54.37209                 | 54.4769                  | 45.94                   | -0.02                            | -0.1048                           | 0.084805                                        | 0.124805                                        |
| 9                                            | 45.51                   | 52.66819                 | 52.32203                 | 45.52                   | -0.01                            | 0.346158                          | 0.356158                                        | 0.336158                                        |
| 10                                           | 43.45                   | 45.89726                 | 45.7512                  | 43.4                    | 0.05                             | 0.146056                          | 0.096056                                        | 0.196056                                        |
| 11                                           | 21.76                   | 24.52049                 | 24.63474                 | 21.77                   | -0.01                            | -0.11426                          | 0.104258                                        | 0.124258                                        |
| 12                                           | 12.38                   | 16.76554                 | 16.81309                 | 12.46                   | -0.08                            | -0.04755                          | 0.032449                                        | 0.127551                                        |
| 13                                           | 57.59                   | 59.75757                 | 59.75669                 | 57.66                   | -0.07                            | 0.000872                          | 0.070872                                        | 0.069128                                        |
| 14                                           | 60.34                   | 63.38961                 | 63.18418                 | 60.28                   | 0.06                             | 0.205423                          | 0.145423                                        | 0.265423                                        |
| 15                                           | 71.31                   | 71.86564                 | 73.03313                 | 71.39                   | -0.08                            | -1.16749                          | 1.087486                                        | 1.247486                                        |
| 16                                           | 128.18                  | 141.5121                 | 139.838                  | 128.11                  | 0.07                             | 1.674101                          | 1.604101                                        | 1.744101                                        |
| 17                                           | 134.25                  | 141.311                  | 145.657                  | 134.35                  | -0.1                             | -4.34608                          | 4.246076                                        | 4.446076                                        |
| 18                                           | 74.26                   | 78.76283                 | 81.19511                 | 74.25                   | 0.01                             | -2.43228                          | 2.442278                                        | 2.422278                                        |
| 19                                           | 175.86                  | 185.5925                 | 181.2218                 | 175.82                  | 0.04                             | 4.370762                          | 4.330762                                        | 4.410762                                        |
| 20                                           | 26.45                   | 30.371                   | 28.05306                 | 26.52                   | -0.07                            | 2.317937                          | 2.387937                                        | 2.247937                                        |
| 21                                           | 53.38                   | 56.07188                 | 55.63288                 | 53.42                   | -0.04                            | 0.439002                          | 0.479002                                        | 0.399002                                        |
| 1'                                           | 171.16                  | 178.1848                 | 177.9866                 | 171.15                  | 0.01                             | 0.198287                          | 0.188287                                        | 0.208287                                        |
| 2'                                           | 43.89                   | 48.29926                 | 48.3115                  | 43.9                    | -0.01                            | -0.01224                          | 0.002244                                        | 0.022244                                        |
| 3'                                           | 139.02                  | 152.6968                 | 152.1855                 | 139.01                  | 0.01                             | 0.511297                          | 0.501297                                        | 0.521297                                        |
| 4'                                           | 22.68                   | 29.1458                  | 27.00546                 | 22.68                   | 0                                | 2.140339                          | 2.140339                                        | 2.140339                                        |
| 5'                                           | 114.66                  | 123.2339                 | 123.4377                 | 114.69                  | -0.03                            | -0.20381                          | 0.173806                                        | 0.233806                                        |
| <b>MAE<math>_{\Delta\Delta\delta}</math></b> |                         |                          |                          |                         |                                  |                                   | <b>0.8324</b>                                   | 0.8650                                          |

### Theory and ECD calculation details.

In general, conformational analyses were carried out via random searching in the Sybyl-X 2.0 using the MMFF94S force field with an energy cutoff of 5 kcal/mol.<sup>[1]</sup> The results showed eight lowest energy conformer for both compounds. Subsequently, geometry optimizations and frequency analyses were implemented at the B3LYP-D3(BJ)/6-31G\* level in PCM methanol using ORCA5.0.1<sup>[2]</sup> All conformers used for property calculations in this work were characterized to be stable point on potential energy surface (PES) with no imaginary frequencies. The excitation energies, oscillator strengths, and rotational strengths (velocity) of the first 60 excited states were calculated using the TD-DFT methodology at the PBE0/def2-TZVP level in PCM

methanol using ORCA5.0.1.<sup>[2]</sup> The ECD spectra were simulated by the overlapping Gaussian function (half the bandwidth at 1/e peak height, sigma = 0.30 for all).<sup>[3]</sup> Gibbs free energies for conformers were determined by using thermal correction at B3LYP-D3(BJ)/6-31G\* level and electronic energies evaluated at the wB97M-V/def2-TZVP level in PCM methanol using ORCA5.0.1<sup>[2]</sup> To get the final spectra, the simulated spectra of the conformers were averaged according to the boltzmann distribution theory and their relative Gibbs free energy ( $\Delta G$ ). By comparing the experiment spectra with the calculated model molecules, the absolute configuration of the only chiral center was determined to be.

[1]. Sybyl Software, version X 2.0; Tripos Associates Inc.: *St. Louis, MO*, 2013.

[2]. Neese, F. (2012) The ORCA program system, Wiley Interdiscip. Rev.: *Comput. Mol. Sci.*, 2, 73-78.

[3]. Stephens, P. J.; Harada, N. ECD cotton effect approximated by the Gaussian curve and other methods. *Chirality* 2010, 22, 229–233.
